# Supplementary material for: Sensing and extraction of hazardous metals by di-phosphonates of heterocycles: a combined experimental and theoretical study
Source: Royal Society of Chemistry journal article supplement (doi:10.1039/d3dt01534c), 2023-01-01
Supplement: d3dt01534c1.pdf [file d3dt01534c1.pdf]

# Supporting Information

## Sensing and extraction of hazardous metals by di-phosphonates of heterocycles: combined experimental and theoretical study

Ekaterina A. Konopkina <sup>a</sup>, Anton S. Pozdeev <sup>b</sup>, Paulina Kalle <sup>c</sup>, Dmitry O. Kirsanov <sup>d,e</sup>, Nikolai A. Smol'yanov <sup>e</sup>, Anna A. Kirsanova <sup>a</sup>, Stepan N. Kalmykov <sup>a</sup>, Vladimir G. Petrov <sup>a</sup>, Nataliya E. Borisova <sup>a</sup>, Petr I. Matveev <sup>a</sup>

Corresponding author's e-mail konopkina.kate@gmail.com

<sup>a</sup> Department of Chemistry, Lomonosov Moscow State University, Moscow, Russian Federation;

<sup>b</sup> Department of Chemistry and Biochemistry, Utah State University, 0300 Old Main Hill, Logan, UT, 84322-0300, USA

<sup>c</sup> N.S. Kurnakov Institute of General and Inorganic Chemistry of the Russian Academy of Sciences, Moscow, Russian Federation;

<sup>d</sup> Institute of Chemistry, Saint-Petersburg State University, Saint-Petersburg, Russian Federation;

<sup>e</sup> ITMO University, Saint-Petersburg, Russian Federation

### Table of content:

|                                                                                                        |    |
|--------------------------------------------------------------------------------------------------------|----|
| 1. Spectral information for Phen-PO-C5 (Tetrapentyl 1,10-phenanthroline-2,9-diylbis(phosphonate))..... | 1  |
| 2. Solvent Extraction.....                                                                             | 2  |
| 3. Sensor experiments.....                                                                             | 3  |
| 4. X-ray diffraction data.....                                                                         | 5  |
| 5. DFT calculations.....                                                                               | 10 |
| Cartesian coordinates of the optimized geometries.....                                                 | 12 |

### 1. Spectral information for Phen-PO-C5 (Tetrapentyl 1,10-phenanthroline-2,9-diylbis(phosphonate))

Tetrapentyl 1,10-phenanthroline-2,9-diylbis(phosphonate)

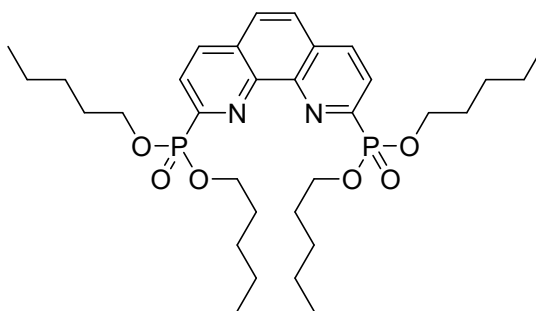

Yield 10%, colorless oil.

<sup>1</sup>H NMR (600 MHz, CDCl<sub>3</sub>) δ 8.37 (dd, *J* = 8.1, 5.5 Hz, 2H), 8.29 (dd, *J* = 8.1, 4.9 Hz, 2H), 7.90 (s, 2H), 4.42 (dq, *J* = 10.0, 6.7 Hz, 4H), 4.36 (dq, *J* = 10.1, 6.8 Hz, 4H), 1.76 (dq, *J* = 13.6, 6.6 Hz, 1H), 1.38 (pd, *J* = 7.4, 2.0 Hz, 8H), 1.32 (hd, *J* = 7.0, 1.9 Hz, 8H), 0.85 (t, *J* = 7.2 Hz, 12H).

$^{13}\text{C}$  NMR (151 MHz,  $\text{CDCl}_3$ )  $\delta$  152.71 (d,  $J = 227.4$  Hz), 145.62 (d,  $J = 25.9$  Hz), 135.52 (d,  $J = 11.8$  Hz), 129.21 (s), 127.68 (s), 125.86 (d,  $J = 26.3$  Hz), 67.38 (d,  $J = 6.7$  Hz), 29.84 (d,  $J = 5.9$  Hz), 27.15 (s), 21.74 (s), 13.41 (s).

$^{31}\text{P}$  NMR (243 MHz,  $\text{CDCl}_3$ )  $\delta$  12.49.

**HR-ESI-MS:** calc.  $m/z = 621,3217$ ; found  $m/z = 621,3191$

**FT-IR:**  $1263\text{ cm}^{-1}$  (P=O)

## 2. Solvent Extraction

Table S1 Distribution ratio for the d-metal cations for the pyridine ligands Organic phase:  $c(\text{L}) = 0.05\text{ mol L}^{-1}$  in F-3, Aqueous phase:  $c(\text{HNO}_3) = 3\text{ mol L}^{-1}$ ,  $c(\text{M(II)}) = 1 \cdot 10^{-4}\text{ mol L}^{-1}$ .  
Temperature:  $25\text{ }^\circ\text{C}$ .

|              | D(Co)           | D(Ni)           | D(Cu)           | D(Zn)           | D(Cd)           | D(Pb)           |
|--------------|-----------------|-----------------|-----------------|-----------------|-----------------|-----------------|
| Py-PO-iPr    | $0.03 \pm 0.01$ | $0.02 \pm 0.01$ | <0.01           | $0.01 \pm 0.01$ | $0.04 \pm 0.01$ | $0.8 \pm 0.2$   |
| Py-PO-cHex   | $0.03 \pm 0.01$ | $0.02 \pm 0.01$ | $0.01 \pm 0.01$ | $0.21 \pm 0.1$  | $0.04 \pm 0.01$ | $0.2 \pm 0.1$   |
| Py-PO-C5     | $0.01 \pm 0.01$ | $0.01 \pm 0.01$ | <0.01           | $0.02 \pm 0.01$ | <0.01           | $0.3 \pm 0.1$   |
| Py-PO-2EtHex | $0.01 \pm 0.01$ | <0.01           | $0.01 \pm 0.01$ | <0.01           | <0.01           | $0.03 \pm 0.01$ |

**Table S2** Distribution ratio for the d-metal cations for the ligand PO-Phen-C5 Organic phase:  $c(\text{PO-Phen-C5}) = 0.05\text{ mol L}^{-1}$  in F-3, Aqueous phase:  $c(\text{HNO}_3) = 3\text{ mol L}^{-1}$ ,  $c(\text{M(II)}) = 1 \cdot 10^{-4}\text{ mol L}^{-1}$ . Temperature:  $25\text{ }^\circ\text{C}$ .

|                                                        | D(Co) | D(Ni) | D(Cu)           | D(Zn)           | D(Cd) | D(Pb) |
|--------------------------------------------------------|-------|-------|-----------------|-----------------|-------|-------|
| Phen-PO-C5, $c(\text{HNO}_3) = 0.05\text{ mol L}^{-1}$ | <0.01 | <0.01 | $0.6 \pm 0.2$   | <0.01           | >90   | >90   |
| Phen-PO-C5, $c(\text{HNO}_3) = 1\text{ mol L}^{-1}$    | <0.01 | <0.01 | $0.11 \pm 0.04$ | <0.01           | >90   | >90   |
| Phen-PO-C5, $c(\text{HNO}_3) = 3\text{ mol L}^{-1}$    | <0.01 | <0.01 | $1.27 \pm 0.5$  | $0.03 \pm 0.01$ | >90   | >90   |

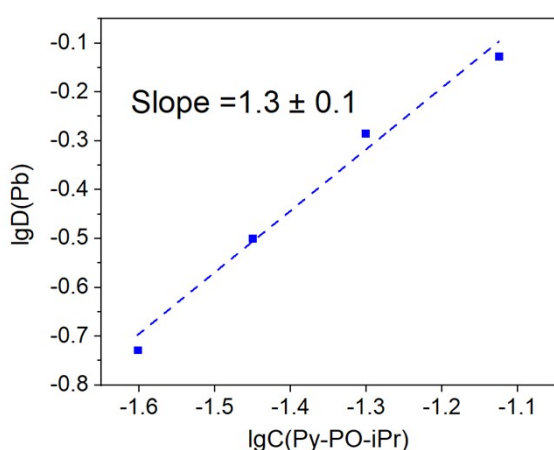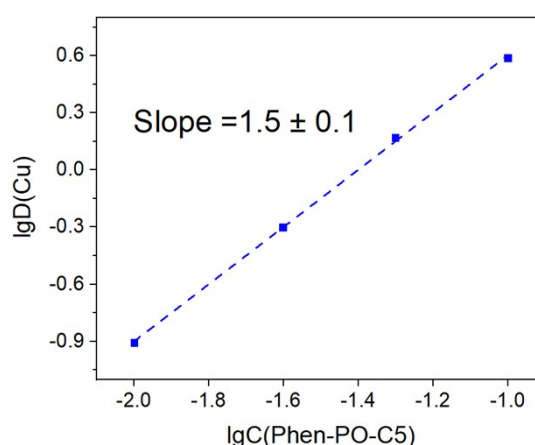

Figure S1 Dependence of Pb(II) and Cu(II) extraction on ligand concentration, Organic phase:  $c(\text{L}) = 0.025 - 0.1\text{ mol L}^{-1}$  in F-3, Aqueous phase:  $c(\text{HNO}_3) = 3\text{ mol L}^{-1}$  with  $c(\text{M(II)}) = 1 \cdot 10^{-4}\text{ mol L}^{-1}$ . Temperature:  $25\text{ }^\circ\text{C}$ .

a)

b)

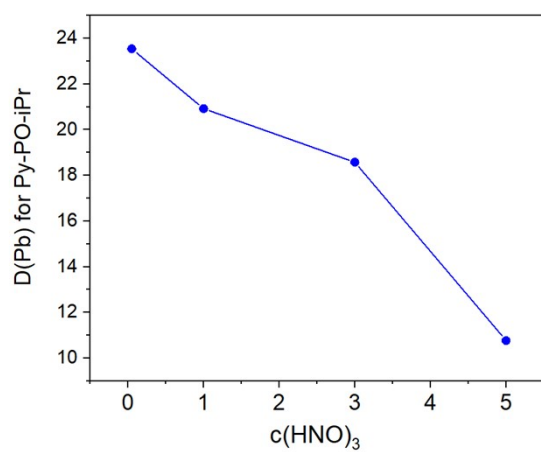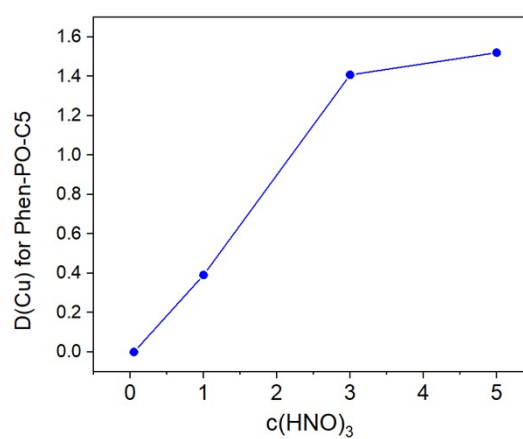

Figure S2 The dependence of extraction of Pb(II) (a) and Cu(II) (b) on nitric acid concentration for Py-PO-iPr and Phen-PO-C5 ligands. Organic phase:  $c(\text{Py-PO-iPr}) = 0.1 \text{ mol L}^{-1}$ ,  $c(\text{Phen-PO-C5}) = 0.05 \text{ mol L}^{-1}$  in F-3, Aqueous phase:  $c(\text{HNO}_3) = 0.05\text{-}5 \text{ mol L}^{-1}$   $c(\text{M(II)}) = 1 \cdot 10^{-4} \text{ mol L}^{-1}$ .  
Temperature:  $25 \pm 1^\circ\text{C}$ .

### 3. Sensor experiments

Membrane Composition: membrane mass = 300 mg,  $c(\text{Ligand}) = 50 \text{ mmol}\cdot\text{kg}^{-1}$ ,  $c(\text{CCD}) = 10 \text{ mmol}\cdot\text{kg}^{-1}$ ,  $m(\text{PVC}) : m(\text{NPOE}) = 1:2$ .

Table S3 Membranes composition.

| Ligand       | Ligand mass, mg | CCD mass, mg | PVC mass, mg | NPOE mass, mg |
|--------------|-----------------|--------------|--------------|---------------|
| Py-PO-iPr    | 6.1             | 1.5          | 97.5         | 194.9         |
| Py-PO-cHex   | 8.5             | 1.5          | 96.7         | 193.3         |
| Py-PO-C5     | 7.8             | 1.5          | 96.9         | 193.8         |
| Py-PO-2EtHex | 10.3            | 1.5          | 96.1         | 192.1         |
| Phen-PO-C5   | 9.3             | 1.5          | 96.4         | 192.8         |

Table S4 Slopes ( $\pm 2 \text{ mV/dec}$ ) of electrode functions for various cations. Inner electrolyte solution is  $0.01 \text{ mol}\cdot\text{L}^{-1} \text{ NaCl}$ .

| Sensor type/Cation | Py-PO-iPr | Py-PO-cHex | Py-PO-C5  | Py-PO-2EtHex | Phen-PO-C5 |
|--------------------|-----------|------------|-----------|--------------|------------|
| Zn(II)             | 24        | 19         | 4         | 25           | <b>58</b>  |
| Cu(II)             | 30        | 22         | 12        | <b>37</b>    | <b>76</b>  |
| Ni(II)             | 7         | 9          | 4         | 15           | <b>31</b>  |
| Co(II)             | 11        | 12         | 4         | 19           | <b>44</b>  |
| Cd(II)             | 21        | 20         | 10        | 28           | <b>49</b>  |
| Pb(II)             | <b>35</b> | <b>31</b>  | <b>46</b> | <b>40</b>    | <b>55</b>  |

Table S5 Slopes ( $\pm 2 \text{ mV/dec}$ ) of electrode functions for various cations. Inner electrolyte solution is  $0.01 \text{ mol}\cdot\text{L}^{-1} \text{ CuCl}_2$  or  $\text{ZnCl}_2$ .

| Sensor type | Sensor filler   | Py-PO-iPr | Py-PO-cHex | Py-PO-C5 | Py-PO-2EtHex | Phen-PO-C5 |
|-------------|-----------------|-----------|------------|----------|--------------|------------|
| Cation      |                 |           |            |          |              |            |
| Cu(II)      | $\text{CuCl}_2$ | 19        | 20         | 14       | <b>27</b>    | <b>32</b>  |
| Zn(II)      | $\text{ZnCl}_2$ | 14        | 16         | 8        | 22           | 22         |

Table S6 Lower detection limits (LOD) and linear response ranges (LR) for potentiometric sensors (mol/L). Inner electrolyte solution is 0.01 mol·L<sup>-1</sup> NaCl.

| Sensor type/Cation | Parameter | Py-PO-iPr                           | Py-PO-cHex                          | Py-PO-C5                            | Py-PO-2EtHex                        | Phen-PO-C5                          |
|--------------------|-----------|-------------------------------------|-------------------------------------|-------------------------------------|-------------------------------------|-------------------------------------|
| Zn(II)             | LOD       | 6*10 <sup>-6</sup>                  | 3*10 <sup>-6</sup>                  | -                                   | 4*10 <sup>-6</sup>                  | 10 <sup>-6</sup>                    |
|                    | LR        | 10 <sup>-5</sup> – 10 <sup>-3</sup> | 10 <sup>-5</sup> – 10 <sup>-3</sup> | -                                   | 10 <sup>-5</sup> – 10 <sup>-3</sup> | 10 <sup>-6</sup> – 10 <sup>-3</sup> |
| Cu(II)             | LOD       | 3*10 <sup>-6</sup>                  | 2*10 <sup>-6</sup>                  | -                                   | 10 <sup>-6</sup>                    | 10 <sup>-6</sup>                    |
|                    | LR        | 10 <sup>-5</sup> – 10 <sup>-3</sup> | 10 <sup>-5</sup> – 10 <sup>-3</sup> | -                                   | 10 <sup>-6</sup> – 10 <sup>-3</sup> | 10 <sup>-6</sup> – 10 <sup>-3</sup> |
| Ni(II)             | LOD       | 3*10 <sup>-5</sup>                  | 10 <sup>-5</sup>                    | -                                   | 3*10 <sup>-6</sup>                  | 10 <sup>-6</sup>                    |
|                    | LR        | 10 <sup>-4</sup> – 10 <sup>-3</sup> | 10 <sup>-5</sup> – 10 <sup>-3</sup> | -                                   | 10 <sup>-5</sup> – 10 <sup>-3</sup> | 10 <sup>-6</sup> – 10 <sup>-3</sup> |
| Co(II)             | LOD       | 10 <sup>-5</sup>                    | 3*10 <sup>-6</sup>                  | -                                   | 10 <sup>-6</sup>                    | 10 <sup>-6</sup>                    |
|                    | LR        | 10 <sup>-5</sup> – 10 <sup>-3</sup> | 10 <sup>-5</sup> – 10 <sup>-3</sup> | -                                   | 10 <sup>-6</sup> – 10 <sup>-3</sup> | 10 <sup>-6</sup> – 10 <sup>-3</sup> |
| Cd(II)             | LOD       | 3*10 <sup>-6</sup>                  | 3*10 <sup>-6</sup>                  | -                                   | 10 <sup>-5</sup>                    | 10 <sup>-6</sup>                    |
|                    | LR        | 10 <sup>-5</sup> – 10 <sup>-3</sup> | 10 <sup>-5</sup> – 10 <sup>-3</sup> | -                                   | 10 <sup>-5</sup> – 10 <sup>-3</sup> | 10 <sup>-6</sup> – 10 <sup>-3</sup> |
| Pb(II)             | LOD       | 4*10 <sup>-6</sup>                  | 10 <sup>-7</sup>                    | 10 <sup>-6</sup>                    | 2*10 <sup>-6</sup>                  | 10 <sup>-6</sup>                    |
|                    | LR        | 10 <sup>-5</sup> – 10 <sup>-3</sup> | 10 <sup>-7</sup> – 10 <sup>-3</sup> | 10 <sup>-5</sup> – 10 <sup>-3</sup> | 10 <sup>-5</sup> – 10 <sup>-3</sup> | 10 <sup>-6</sup> – 10 <sup>-3</sup> |

#### 4. X-ray diffraction data

Table S7 Crystallographic details for CdCl<sub>2</sub>Py-PO-iPr , Pb(NO<sub>3</sub>)<sub>2</sub>Py-PO-cHex and Cd(NO<sub>3</sub>)<sub>2</sub>Py-PO-iPr structures.

|                                        | CdCl <sub>2</sub> Py-PO-iPr                                                                                         | Pb(NO <sub>3</sub> ) <sub>2</sub> Py-PO-cHex                                     | Cd(NO <sub>3</sub> ) <sub>2</sub> Py-PO-iPr                                      |
|----------------------------------------|---------------------------------------------------------------------------------------------------------------------|----------------------------------------------------------------------------------|----------------------------------------------------------------------------------|
| Empirical formula                      | C <sub>34</sub> H <sub>62</sub> Cd <sub>2</sub> Cl <sub>3.6</sub> N <sub>2.4</sub> O <sub>13.2</sub> P <sub>4</sub> | C <sub>58</sub> H <sub>94</sub> N <sub>4</sub> O <sub>18</sub> P <sub>4</sub> Pb | C <sub>17</sub> H <sub>31</sub> CdN <sub>3</sub> O <sub>12</sub> P <sub>24</sub> |
| Mw                                     | 1191.96                                                                                                             | 1466.44                                                                          | 643.79                                                                           |
| T (K)                                  | 150(2)                                                                                                              | 150(2)                                                                           | 100(2)                                                                           |
| Crystal size (mm <sup>3</sup> )        | 0.35 × 0.25 × 0.1                                                                                                   | 0.32 × 0.1 × 0.08                                                                | 0.17 × 0.13 × 0.01                                                               |
| Crystal system                         | monoclinic                                                                                                          | monoclinic                                                                       | monoclinic                                                                       |
| Space group                            | P21/n                                                                                                               | P21/c                                                                            | P21/c                                                                            |
| <i>a</i> (Å)                           | 12.8333(9)                                                                                                          | 12.9451(13)                                                                      | 22.4562(14)                                                                      |
| <i>b</i> (Å)                           | 16.1328(11)                                                                                                         | 35.541(3)                                                                        | 13.6538(9)                                                                       |
| <i>c</i> (Å)                           | 13.2377(9)                                                                                                          | 15.6372(14)                                                                      | 18.4024(11)                                                                      |
| <i>α</i> (°)                           | 90                                                                                                                  | 90                                                                               | 90                                                                               |
| <i>β</i> (°)                           | 110.798(2)                                                                                                          | 108.592(4)                                                                       | 108.491(2)                                                                       |
| <i>γ</i> (°)                           | 90                                                                                                                  | 90                                                                               | 90                                                                               |
| V (Å <sup>3</sup> )                    | 2562.1(3)                                                                                                           | 6819.0(11)                                                                       | 5351.1(6)                                                                        |
| Z                                      | 2                                                                                                                   | 4                                                                                | 8                                                                                |
| ρ <sub>calc</sub> (g/cm <sup>3</sup> ) | 1.545                                                                                                               | 1.428                                                                            | 1.598                                                                            |
| μ (mm <sup>-1</sup> )                  | 1.198                                                                                                               | 2.636                                                                            | 0.996                                                                            |

|                                                        |                                    |                                    |                                    |
|--------------------------------------------------------|------------------------------------|------------------------------------|------------------------------------|
| F(000)                                                 | 1211                               | 3024                               | 2624                               |
| $\theta$ range for data collection ( $^\circ$ )        | $2.28 < \theta < 27.79$            | $2.02 < \theta < 25.05$            | $1.77 < \theta < 26.43$            |
| Reflections collected                                  | 43896                              | 49253                              | 61083                              |
| Independent reflections                                | 5817                               | 12064                              | 10953                              |
| Data/<br>restraints/<br>parameters                     | 5817/4/286                         | 12064/290/530                      | 10953/0/647                        |
| Goodness-of-fit<br>on $F^2$                            | 1.149                              | 1.039                              | 1.092                              |
| Final R indexes<br>[ $I \geq 2\sigma(I)$ ]             | $R_1 = 0.0355,$<br>$wR_2 = 0.0785$ | $R_1 = 0.0747,$<br>$wR_2 = 0.1991$ | $R_1 = 0.0449,$<br>$wR_2 = 0.0830$ |
| Final R indexes<br>[all data]                          | $R_1 = 0.0395,$<br>$wR_2 = 0.0801$ | $R_1 = 0.1143,$<br>$wR_2 = 0.2263$ | $R_1 = 0.0814,$<br>$wR_2 = 0.0955$ |
| Largest diff.<br>peak/hole<br>( $e \text{ \AA}^{-3}$ ) | 1.05 / -0.77                       | 1.25 / -1.69                       | 1.19 / -1.12                       |

Table S8 Distances in the coordination sphere of Cadmium in Cd(NO<sub>3</sub>)<sub>2</sub>Py-PO-iPr

| Bond    | Å        | Bond    | Å        |
|---------|----------|---------|----------|
| Cd1 N1  | 2.369(3) | Cd2 N4  | 2.351(3) |
| Cd1 O1  | 2.295(3) | Cd2 O13 | 2.292(3) |
| Cd1 O2  | 2.292(3) | Cd2 O14 | 2.313(3) |
| Cd1 O7  | 2.522(3) | Cd2 O23 | 2.528(3) |
| Cd1 O8  | 2.264(3) | Cd2 O22 | 2.273(3) |
| Cd1 O10 | 2.296(3) | Cd2 O20 | 2.293(3) |
| Cd1 O11 | 2.452(3) | Cd2 O19 | 2.446(3) |

Table S9 Torsion angles in the ligands in Cd(NO<sub>3</sub>)<sub>2</sub>Py-PO-iPr

| Torsion angle | Cd1       | Torsion angle | Cd2      |
|---------------|-----------|---------------|----------|
| O1 P1 C1 N1   | 17.3(4)°  | O13 P3 C18 N4 | 7.4(4)°  |
| O2 P2 C5 N1   | -13.0(3)° | O14 P4 C22 N4 | -4.8(4)° |

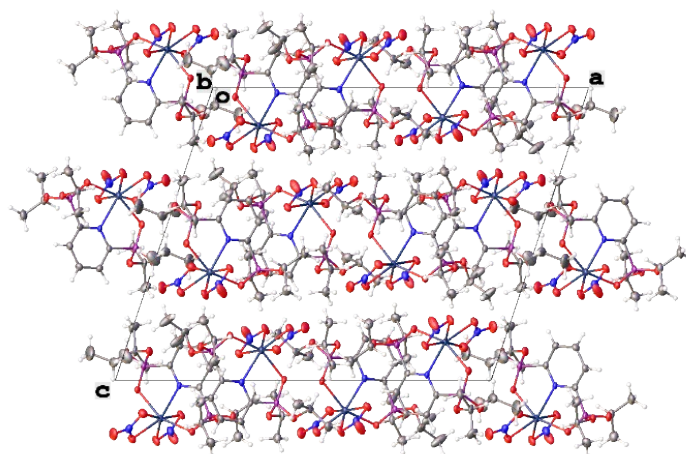Figure S3 Fragment of the crystal packing of Cd(NO<sub>3</sub>)<sub>2</sub>Py-PO-iPr



Table S10 Distances in the coordination sphere of Pb and torsion angles for the chelating and bridging ligands in  $\text{Pb}(\text{NO}_3)_2\text{Py-PO-cHex}$ .

| Bond       | Å                  | Torsion angle   | °                  |
|------------|--------------------|-----------------|--------------------|
| Pb1 O1     | 2.690(8)           | N1 C1 P2a/P2 O1 | -13.7(14)/23.5(15) |
| Pb1 O2     | 2.549(8)           | N1 C5 P1 O2     | 3.9(13)            |
| Pb1 O3     | 2.573(6)           | N2 C6 P3 O3     | -174.4(10)         |
| Pb1 O4'    | 2.626(7)           | N2 C10 P4 O4    | 176.9(9)           |
| Pb1 O5/O5a | 2.73 (4) / 2.61(4) |                 |                    |
| Pb1 O6/O6a | 2.54(3) / 2.61(3)  |                 |                    |
| Pb1 O8     | 2.783(11)          |                 |                    |
| Pb1 O9     | 2.763(9)           |                 |                    |
| Pb1 N1     | 2.826(8)           |                 |                    |

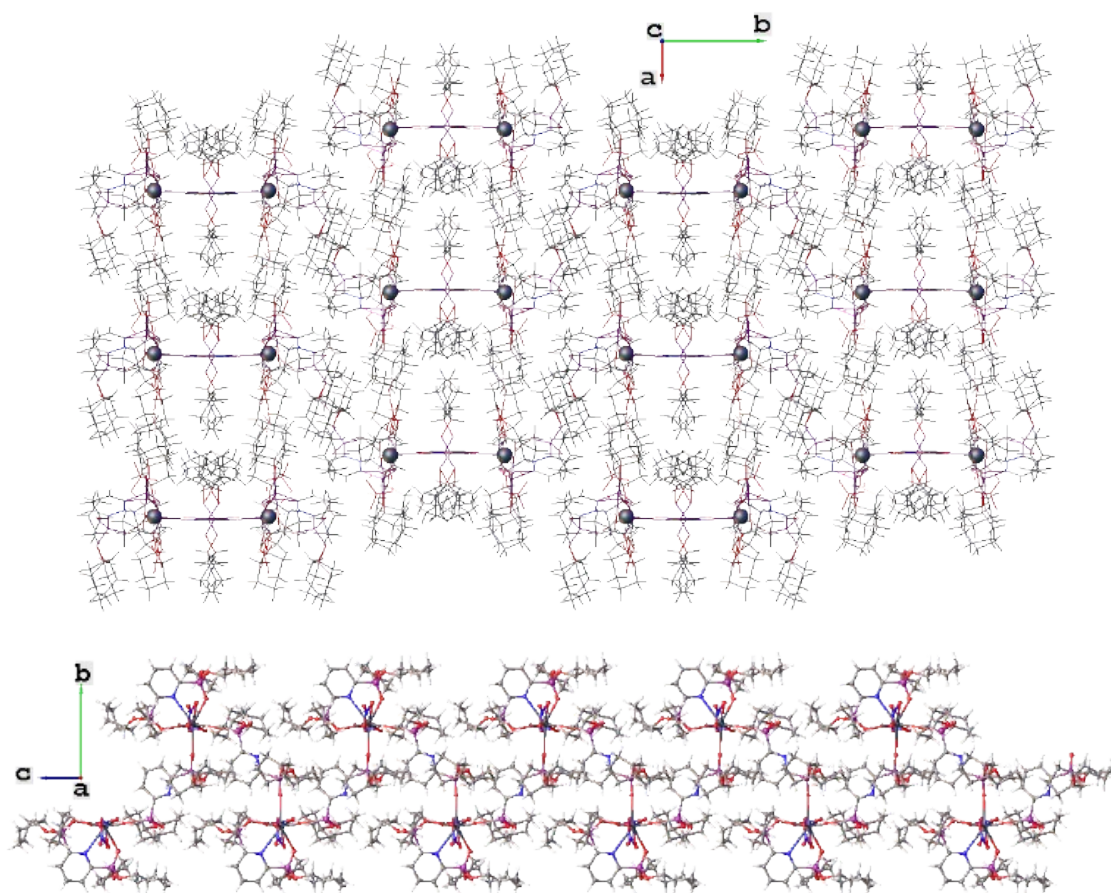

Figure S4 Polymeric chains (side and top views) in  $\text{Pb}(\text{NO}_3)_2\text{Py-PO-cHex}$ .

Table S11 Distances in the coordination sphere of Cd in CdCl<sub>2</sub>Py-PO-iPr.

| Bond     | Å          | Average bond lengths<br>in Cadmium complexes, Å |              |
|----------|------------|-------------------------------------------------|--------------|
| Bond     | Å          | Cd Cl(bridging)                                 | 2.635(0.089) |
| Cd1 Cl2  | 2.4436(7)  |                                                 |              |
| Cd1 Cl2' | 2.8910(8)  | Cd Cl(terminal)                                 | 2.473(0.068) |
| Cd1 Cl1  | 2.5315(13) | Cd O                                            | 2.358(0.099) |
| Cd1 O2   | 2.367(2)   |                                                 |              |
| Cd1 O1   | 2.349(2)   |                                                 |              |
|          |            |                                                 |              |

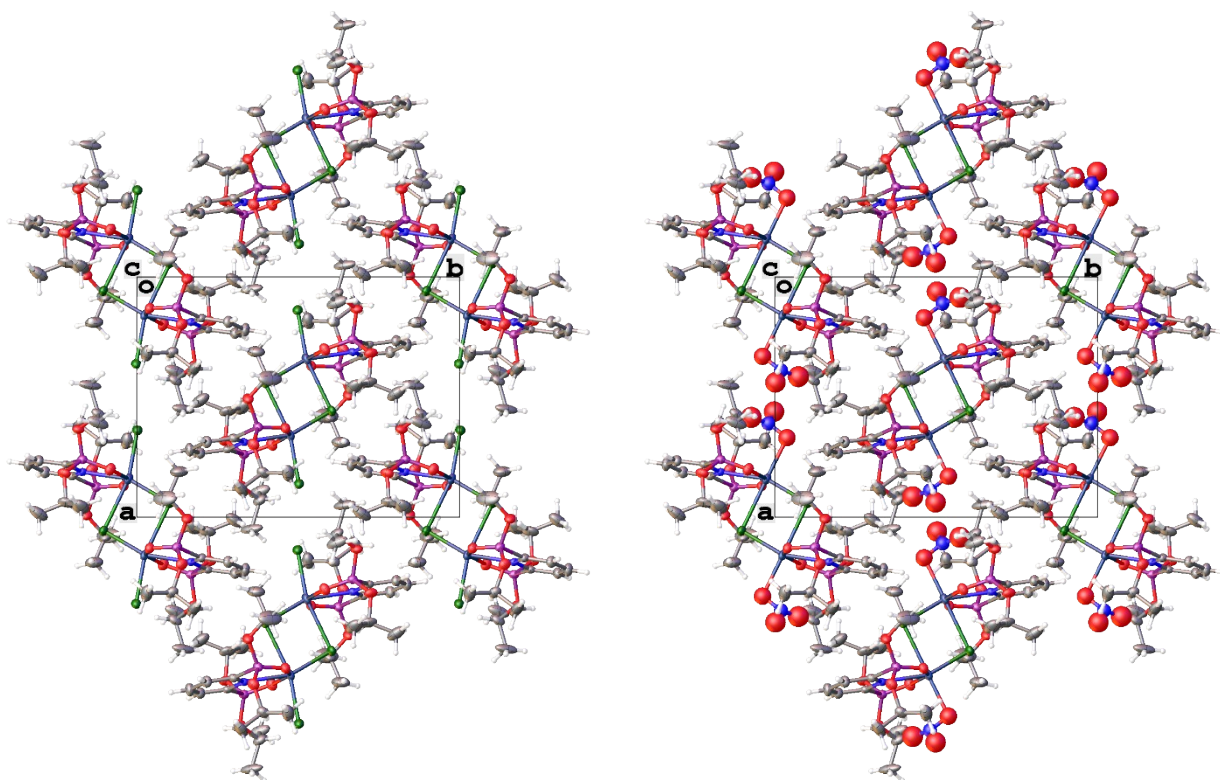

Figure S5 Fragment of the crystal packing of CdCl<sub>2</sub>Py-PO-iPr (with chloride – left and with nitrate – right).

## 5. DFT calculations

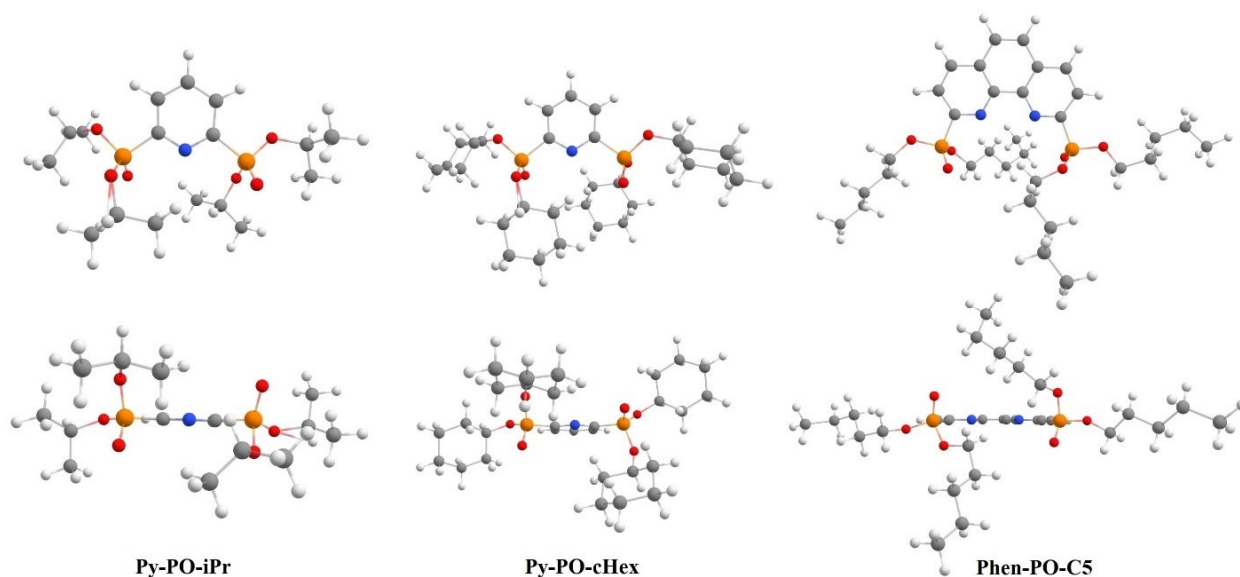

Figure S6 Optimized structures of the ligands in two projections at B97M-V/def2-TZVP level of theory.

Table S12 The energy difference between the classical and non-classical structures of Py-PO-iPr\*Pb(NO<sub>3</sub>)<sub>2</sub> complex depending on chosen functional. def2-TZVP basis set, solvent effects at CPCM(acetone) level.

| Level of theory | ( $E_{\text{classical}} - E_{\text{non-classical}}$ ), kcal/mol |
|-----------------|-----------------------------------------------------------------|
| revPBE0-D3      | 4.8                                                             |
| B3LYP           | -3.7                                                            |
| wB97M-V         | -1.1                                                            |
| B2PLYP          | 1.8                                                             |

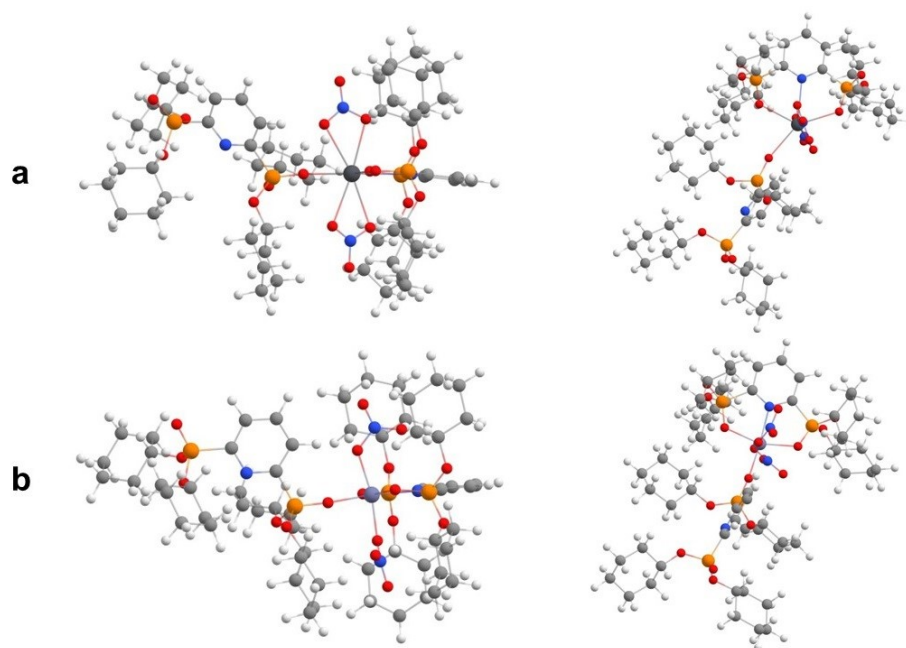

Figure S7 Structure of the (a)  $\text{Pb}(\text{NO}_3)_2 \cdot 2\text{Py-PO-cHex}$  complex, (b)  $\text{Zn}(\text{NO}_3)_2 \cdot 2\text{Py-PO-cHex}$  complexes.

Table S13 The energy of complex formation for Py-PO-iPr\*M(NO<sub>3</sub>)<sub>2</sub> complex (M=Pb, Cd, Zn, Cu) with def2-TZVP basis set (CPCM model) depending on chosen functional, kcal/mol.

| DFT functional | M  | Initial state                                     |                                                                    |
|----------------|----|---------------------------------------------------|--------------------------------------------------------------------|
|                |    | [M(H <sub>2</sub> O) <sub>6</sub> ] <sup>2+</sup> | [M(NO <sub>3</sub> )(H <sub>2</sub> O) <sub>5</sub> ] <sup>+</sup> |
| revPBE0-D3     | Pb | -11.6                                             | -5.1                                                               |
|                | Cd | -6.9                                              | -1.2                                                               |
|                | Zn | -3.1                                              | 2.6                                                                |
|                | Cu | -7.9                                              | -0.1                                                               |
| B3LYP          | Pb | -8.8                                              | -1.6                                                               |
|                | Cd | -6.9                                              | -1.4                                                               |
|                | Zn | -0.7                                              | 5.4                                                                |
|                | Cu | -6.3                                              | 2.1                                                                |
| wB97M-V        | Pb | -20.1                                             | -8.6                                                               |
|                | Cd | -18.4                                             | -6.9                                                               |
|                | Zn | -15.0                                             | -4.4                                                               |
|                | Cu | -16.0                                             | -3.7                                                               |
| B2PLYP         | Pb | -15.0                                             | -6.8                                                               |
|                | Cd | -12.2                                             | -5.0                                                               |
|                | Zn | -6.4                                              | 0.6                                                                |
|                | Cu | -8.7                                              | -0.3                                                               |

Table S14 DFT energies of complex formation at wB97M-V/def2-TZVP theoretical level.

| Complex                                       | Energy of complex formation (including solvents at CPCM level), kcal/mol |                                                                                  | Preorganization energy (gas phase), kcal/mol |
|-----------------------------------------------|--------------------------------------------------------------------------|----------------------------------------------------------------------------------|----------------------------------------------|
|                                               | [M(H <sub>2</sub> O) <sub>6</sub> ] <sup>2+</sup> initial state          | [M(NO <sub>3</sub> )(H <sub>2</sub> O) <sub>5</sub> ] <sup>+</sup> initial state |                                              |
| Pb(NO <sub>3</sub> ) <sub>2</sub> *Py-PO-iPr  | -20.1                                                                    | -8.6                                                                             | 9.7                                          |
| Cd(NO <sub>3</sub> ) <sub>2</sub> *Py-PO-iPr  | -18.4                                                                    | -6.9                                                                             | 11.4                                         |
| Cu(NO <sub>3</sub> ) <sub>2</sub> *Py-PO-iPr  | -16.0                                                                    | -3.7                                                                             | 12.0                                         |
| Zn(NO <sub>3</sub> ) <sub>2</sub> *Py-PO-iPr  | -15.0                                                                    | -4.4                                                                             | 16.4                                         |
| Pb(NO <sub>3</sub> ) <sub>2</sub> *Py-PO-cHex | -24.7                                                                    | -13.2                                                                            | 9.8                                          |
| Cd(NO <sub>3</sub> ) <sub>2</sub> *Py-PO-cHex | -22.7                                                                    | -11.2                                                                            | 12.0                                         |
| Cu(NO <sub>3</sub> ) <sub>2</sub> *Py-PO-cHex | -19.1                                                                    | -6.7                                                                             | 13.8                                         |
| Zn(NO <sub>3</sub> ) <sub>2</sub> *Py-PO-cHex | -20.9                                                                    | -10.3                                                                            | 15.4                                         |
| Pb(NO <sub>3</sub> ) <sub>2</sub> *Phen-PO-C5 | -33.5                                                                    | -22.0                                                                            | 12.7                                         |
| Cd(NO <sub>3</sub> ) <sub>2</sub> *Phen-PO-C5 | -32.8                                                                    | -21.2                                                                            | 13.7                                         |
| Cu(NO <sub>3</sub> ) <sub>2</sub> *Phen-PO-C5 | -27.8                                                                    | -15.5                                                                            | 13.8                                         |
| Zn(NO <sub>3</sub> ) <sub>2</sub> *Phen-PO-C5 | -22.3                                                                    | -11.7                                                                            | 16.8                                         |

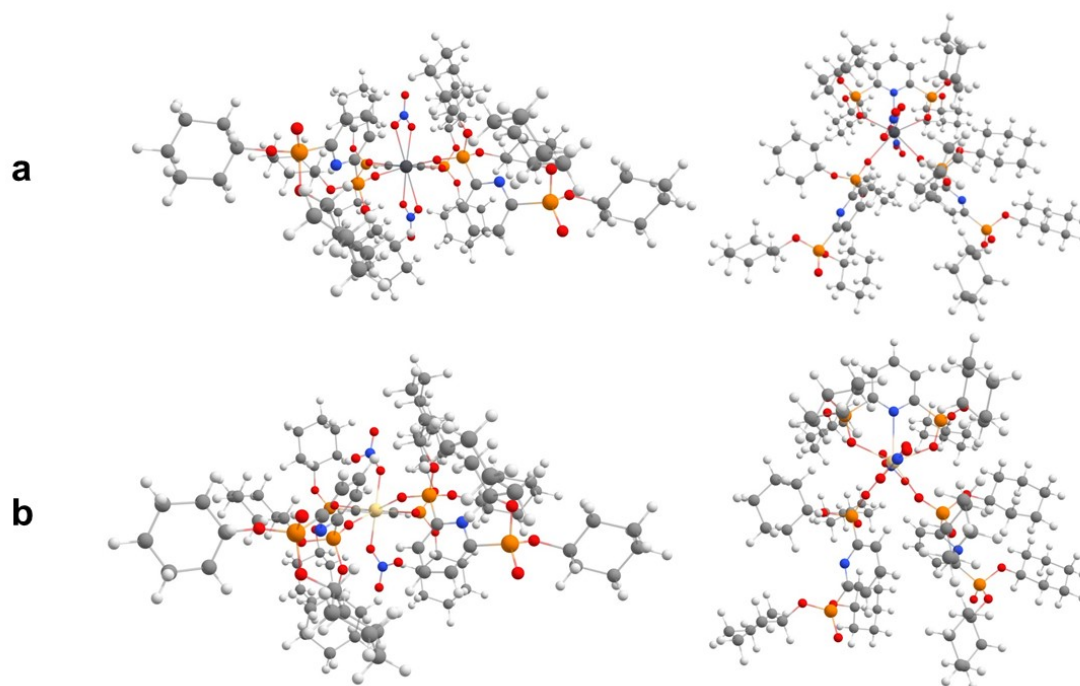

Figure S8 Structure of the (a)  $\text{Pb}(\text{NO}_3)_2 \cdot 3\text{Py-PO-cHex}$  complex, (b)  $\text{Cd}(\text{NO}_3)_2 \cdot 3\text{Py-PO-cHex}$  complexes.

Table S15 DFT energies of complex formation in the at PBE/def2-SVP theoretical level.

| Complex                                             | Energy of complex formation according to reactions (1) and (2), kcal/mol |
|-----------------------------------------------------|--------------------------------------------------------------------------|
| $\text{Pb}(\text{NO}_3)_2 \cdot 2\text{Py-PO-cHex}$ | -39.5                                                                    |
| $\text{Cd}(\text{NO}_3)_2 \cdot 2\text{Py-PO-cHex}$ | -22.0                                                                    |
| $\text{Zn}(\text{NO}_3)_2 \cdot 2\text{Py-PO-cHex}$ | -26.4                                                                    |
| $\text{Cu}(\text{NO}_3)_2 \cdot 2\text{Py-PO-cHex}$ | -23.0                                                                    |
| $\text{Pb}(\text{NO}_3)_2 \cdot 3\text{Py-PO-cHex}$ | -29.2                                                                    |
| $\text{Cd}(\text{NO}_3)_2 \cdot 3\text{Py-PO-cHex}$ | -13.5                                                                    |

#### Cartesian coordinates of the optimized geometries

| Structure | XYZ coordinates |              |              |              |
|-----------|-----------------|--------------|--------------|--------------|
| Py-PO-iPr | 6               | -1.648374000 | -0.821804000 | 0.238477000  |
|           | 6               | -2.398787000 | -1.735002000 | 0.969691000  |
|           | 6               | -1.758246000 | -2.490662000 | 1.935012000  |
|           | 6               | -0.401794000 | -2.315325000 | 2.139994000  |
|           | 6               | 0.265007000  | -1.379717000 | 1.361428000  |
|           | 7               | -0.343294000 | -0.647002000 | 0.430461000  |
|           | 1               | -2.311140000 | -3.207419000 | 2.522112000  |
|           | 1               | -3.452878000 | -1.839473000 | 0.779907000  |
|           | 1               | 0.134846000  | -2.878674000 | 2.884534000  |
|           | 15              | 2.035233000  | -1.058018000 | 1.439541000  |
|           | 15              | -2.335068000 | 0.253378000  | -1.040765000 |
|           | 8               | 2.159625000  | 0.496542000  | 1.686594000  |
|           | 8               | -3.855710000 | -0.156791000 | -0.937805000 |

|            |   |              |              |              |
|------------|---|--------------|--------------|--------------|
|            | 8 | -2.007559000 | 1.672935000  | -0.882022000 |
|            | 8 | 2.381425000  | -1.670210000 | 2.850393000  |
|            | 8 | 2.777235000  | -1.556536000 | 0.277786000  |
|            | 6 | -4.972804000 | 0.679852000  | -1.343191000 |
|            | 6 | -5.206276000 | 1.749096000  | -0.306392000 |
|            | 6 | -4.780893000 | 1.232260000  | -2.732508000 |
|            | 1 | -5.803730000 | -0.022947000 | -1.344291000 |
|            | 1 | -4.371653000 | 2.443481000  | -0.284331000 |
|            | 1 | -5.319513000 | 1.309807000  | 0.680904000  |
|            | 1 | -3.979938000 | 1.966990000  | -2.745785000 |
|            | 1 | -4.545661000 | 0.441925000  | -3.439360000 |
|            | 6 | 3.686559000  | 1.960823000  | 0.576144000  |
|            | 6 | 1.219195000  | 2.462967000  | 0.707666000  |
|            | 6 | 2.284494000  | 1.413571000  | 0.556887000  |
|            | 1 | 3.875997000  | 2.487998000  | 1.509415000  |
|            | 1 | 4.412442000  | 1.159170000  | 0.473522000  |
|            | 1 | 0.226953000  | 2.024899000  | 0.660726000  |
|            | 1 | 1.337556000  | 2.988074000  | 1.653748000  |
|            | 1 | 2.126215000  | 0.840087000  | -0.353614000 |
|            | 8 | -1.892325000 | -0.401363000 | -2.410584000 |
|            | 6 | -0.844707000 | 0.088099000  | -3.299653000 |
|            | 6 | -1.324773000 | 1.312005000  | -4.037595000 |
|            | 6 | 0.457464000  | 0.311070000  | -2.577553000 |
|            | 1 | -0.736539000 | -0.740387000 | -3.996653000 |
|            | 1 | -1.458843000 | 2.142130000  | -3.349527000 |
|            | 1 | -2.265078000 | 1.118092000  | -4.546316000 |
|            | 1 | 0.360330000  | 1.121172000  | -1.859163000 |
|            | 1 | 0.786710000  | -0.578741000 | -2.049979000 |
|            | 6 | 4.746794000  | -1.019108000 | 2.924705000  |
|            | 6 | 4.039261000  | -3.419353000 | 2.656423000  |
|            | 6 | 3.720097000  | -2.073057000 | 3.254897000  |
|            | 1 | 4.883528000  | -0.939222000 | 1.849037000  |
|            | 1 | 4.455155000  | -0.048507000 | 3.314549000  |
|            | 1 | 3.278799000  | -4.149451000 | 2.920100000  |
|            | 1 | 4.092817000  | -3.347229000 | 1.574056000  |
|            | 1 | 3.624444000  | -2.159466000 | 4.335346000  |
|            | 1 | 1.222720000  | 0.581446000  | -3.302551000 |
|            | 1 | -0.588151000 | 1.596774000  | -4.785701000 |
|            | 1 | -5.696094000 | 1.722356000  | -3.056276000 |
|            | 1 | -6.115738000 | 2.297839000  | -0.541203000 |
|            | 1 | 1.299753000  | 3.190841000  | -0.097186000 |
|            | 1 | 3.828268000  | 2.658728000  | -0.245969000 |
|            | 1 | 5.700578000  | -1.295021000 | 3.368485000  |
|            | 1 | 4.996065000  | -3.773922000 | 3.033432000  |
| Py-PO-cHex | 6 | -2.160751000 | -0.864994000 | 0.726532000  |
|            | 6 | -3.022220000 | -1.913067000 | 1.029400000  |
|            | 6 | -2.487675000 | -3.181033000 | 1.168080000  |
|            | 6 | -1.126983000 | -3.366495000 | 0.993649000  |
|            | 6 | -0.345879000 | -2.259045000 | 0.690249000  |
|            | 7 | -0.853020000 | -1.036316000 | 0.565914000  |
|            | 1 | -3.125237000 | -4.017690000 | 1.408386000  |
|            | 1 | -4.075484000 | -1.727931000 | 1.156285000  |

|  |    |              |              |              |
|--|----|--------------|--------------|--------------|
|  | 1  | -0.673404000 | -4.337785000 | 1.091576000  |
|  | 15 | 1.423502000  | -2.321373000 | 0.334897000  |
|  | 15 | -2.696364000 | 0.846114000  | 0.494966000  |
|  | 8  | -1.731290000 | 1.837043000  | 0.976997000  |
|  | 8  | 1.731645000  | -3.792962000 | 0.820354000  |
|  | 8  | 1.762746000  | -1.989268000 | -1.053031000 |
|  | 6  | 4.154296000  | -3.896786000 | 0.390394000  |
|  | 6  | 5.263745000  | -4.839088000 | -0.050429000 |
|  | 6  | 4.987031000  | -5.396474000 | -1.436315000 |
|  | 6  | 3.636778000  | -6.091541000 | -1.479498000 |
|  | 6  | 2.525073000  | -5.155080000 | -1.033525000 |
|  | 6  | 2.824694000  | -4.613293000 | 0.345867000  |
|  | 1  | 4.114022000  | -3.041102000 | -0.285429000 |
|  | 1  | 4.335041000  | -3.513403000 | 1.393641000  |
|  | 1  | 5.341029000  | -5.666887000 | 0.660199000  |
|  | 1  | 6.221465000  | -4.321911000 | -0.025344000 |
|  | 1  | 5.778311000  | -6.082984000 | -1.734665000 |
|  | 1  | 4.992293000  | -4.577857000 | -2.160044000 |
|  | 1  | 3.663629000  | -6.964879000 | -0.821156000 |
|  | 1  | 3.427617000  | -6.467035000 | -2.479690000 |
|  | 1  | 1.562767000  | -5.666158000 | -1.021245000 |
|  | 1  | 2.436414000  | -4.313618000 | -1.720514000 |
|  | 1  | 2.843934000  | -5.437952000 | 1.061011000  |
|  | 8  | 2.105013000  | -1.426718000 | 1.441629000  |
|  | 6  | 1.751436000  | 0.874402000  | 0.598554000  |
|  | 6  | 2.407450000  | 2.243546000  | 0.517804000  |
|  | 6  | 3.728375000  | 2.175459000  | -0.227216000 |
|  | 6  | 4.658543000  | 1.167943000  | 0.426979000  |
|  | 6  | 4.006351000  | -0.203448000 | 0.517393000  |
|  | 6  | 2.691044000  | -0.106708000 | 1.256263000  |
|  | 1  | 1.533998000  | 0.514562000  | -0.408578000 |
|  | 1  | 0.805724000  | 0.923239000  | 1.130718000  |
|  | 1  | 2.582062000  | 2.625117000  | 1.528038000  |
|  | 1  | 1.724447000  | 2.945818000  | 0.041274000  |
|  | 1  | 4.199287000  | 3.157213000  | -0.268155000 |
|  | 1  | 3.540792000  | 1.872389000  | -1.261115000 |
|  | 1  | 4.909941000  | 1.516794000  | 1.432806000  |
|  | 1  | 5.598930000  | 1.095376000  | -0.117638000 |
|  | 1  | 4.660755000  | -0.912993000 | 1.022887000  |
|  | 1  | 3.808046000  | -0.590679000 | -0.482883000 |
|  | 1  | 2.878799000  | 0.213257000  | 2.282633000  |
|  | 8  | -3.116410000 | 0.976532000  | -1.029030000 |
|  | 6  | -0.944787000 | 0.670764000  | -2.135990000 |
|  | 6  | -0.065992000 | 1.154247000  | -3.277289000 |
|  | 6  | 0.175046000  | 2.650359000  | -3.182902000 |
|  | 6  | -1.142792000 | 3.405541000  | -3.151066000 |
|  | 6  | -2.015422000 | 2.932521000  | -1.998705000 |
|  | 6  | -2.242037000 | 1.440072000  | -2.094034000 |
|  | 1  | -0.424261000 | 0.815595000  | -1.190006000 |
|  | 1  | -1.142302000 | -0.396543000 | -2.224677000 |
|  | 1  | -0.546105000 | 0.926739000  | -4.233726000 |
|  | 1  | 0.873705000  | 0.604537000  | -3.265109000 |



|          |    |              |              |              |
|----------|----|--------------|--------------|--------------|
|          | 1  | 0.790886000  | 2.992577000  | -4.013937000 |
|          | 1  | 0.734845000  | 2.865311000  | -2.268012000 |
|          | 1  | -1.668231000 | 3.245697000  | -4.097393000 |
|          | 1  | -0.973928000 | 4.478386000  | -3.070838000 |
|          | 1  | -2.977198000 | 3.445838000  | -1.999325000 |
|          | 1  | -1.531629000 | 3.149812000  | -1.046662000 |
|          | 1  | -2.821288000 | 1.223438000  | -2.993373000 |
|          | 8  | -4.105990000 | 0.786181000  | 1.202562000  |
|          | 6  | -4.893238000 | 3.061983000  | 0.665066000  |
|          | 6  | -5.707009000 | 4.220790000  | 1.221435000  |
|          | 6  | -5.122066000 | 4.718020000  | 2.532134000  |
|          | 6  | -5.031568000 | 3.590031000  | 3.545426000  |
|          | 6  | -4.223866000 | 2.425257000  | 2.994741000  |
|          | 6  | -4.818795000 | 1.951227000  | 1.688191000  |
|          | 1  | -3.881547000 | 3.405454000  | 0.441664000  |
|          | 1  | -5.321286000 | 2.685014000  | -0.262131000 |
|          | 1  | -6.737934000 | 3.895141000  | 1.386510000  |
|          | 1  | -5.751828000 | 5.024793000  | 0.488636000  |
|          | 1  | -5.718424000 | 5.539271000  | 2.927458000  |
|          | 1  | -4.121008000 | 5.115467000  | 2.347986000  |
|          | 1  | -6.041226000 | 3.249282000  | 3.792460000  |
|          | 1  | -4.588459000 | 3.940140000  | 4.476024000  |
|          | 1  | -4.197967000 | 1.596691000  | 3.701392000  |
|          | 1  | -3.193056000 | 2.730100000  | 2.815122000  |
|          | 1  | -5.825548000 | 1.570017000  | 1.868493000  |
| Py-PO-C5 | 6  | -4.763458000 | -0.615449000 | 1.255768000  |
|          | 6  | -5.416170000 | 0.040074000  | 0.242500000  |
|          | 6  | -4.679160000 | 0.700015000  | -0.750205000 |
|          | 6  | -3.272215000 | 0.655867000  | -0.644680000 |
|          | 7  | -2.642057000 | 0.020470000  | 0.346191000  |
|          | 6  | -3.362064000 | -0.597327000 | 1.261533000  |
|          | 6  | -5.279210000 | 1.399694000  | -1.834216000 |
|          | 6  | -2.470663000 | 1.326874000  | -1.632684000 |
|          | 6  | -3.102517000 | 2.023733000  | -2.684555000 |
|          | 6  | -4.523013000 | 2.034482000  | -2.762704000 |
|          | 6  | -2.274187000 | 2.690250000  | -3.598969000 |
|          | 1  | -2.720602000 | 3.235028000  | -4.418218000 |
|          | 6  | -0.912523000 | 2.660558000  | -3.435206000 |
|          | 6  | -0.391214000 | 1.938834000  | -2.352699000 |
|          | 7  | -1.144634000 | 1.282450000  | -1.493145000 |
|          | 1  | -6.357215000 | 1.417486000  | -1.899440000 |
|          | 1  | -5.299072000 | -1.138092000 | 2.029864000  |
|          | 1  | -6.495498000 | 0.052562000  | 0.196740000  |
|          | 15 | -2.298397000 | -1.420063000 | 2.459784000  |
|          | 1  | -4.988552000 | 2.568623000  | -3.577940000 |
|          | 1  | -0.250001000 | 3.181272000  | -4.106787000 |
|          | 15 | 1.352329000  | 1.761945000  | -1.938759000 |
|          | 8  | 1.947080000  | 3.072133000  | -2.592828000 |
|          | 8  | 1.956930000  | 0.490828000  | -2.341912000 |
|          | 8  | -1.334717000 | -0.547445000 | 3.130545000  |
|          | 8  | -1.646092000 | -2.634386000 | 1.677988000  |
|          | 6  | 3.375211000  | 3.269154000  | -2.590296000 |

|  |   |              |              |              |
|--|---|--------------|--------------|--------------|
|  | 1 | 3.697466000  | 3.433899000  | -1.563275000 |
|  | 6 | 3.684823000  | 4.454787000  | -3.460087000 |
|  | 1 | 3.852858000  | 2.363468000  | -2.962814000 |
|  | 1 | 3.154121000  | 5.326423000  | -3.071064000 |
|  | 6 | 3.323688000  | 4.239697000  | -4.918043000 |
|  | 1 | 4.749338000  | 4.666008000  | -3.355362000 |
|  | 1 | 2.278292000  | 3.937636000  | -4.978321000 |
|  | 1 | 3.905230000  | 3.401219000  | -5.311022000 |
|  | 6 | 3.545029000  | 5.463514000  | -5.790653000 |
|  | 6 | 4.998628000  | 5.880853000  | -5.903935000 |
|  | 1 | 2.954291000  | 6.293677000  | -5.396717000 |
|  | 1 | 3.151303000  | 5.261662000  | -6.786991000 |
|  | 6 | -0.372686000 | -2.506508000 | 1.001727000  |
|  | 1 | 0.221250000  | -3.357032000 | 1.332117000  |
|  | 1 | 0.119405000  | -1.596390000 | 1.338389000  |
|  | 6 | -0.563801000 | -2.523653000 | -0.490213000 |
|  | 6 | 0.760422000  | -2.563912000 | -1.230323000 |
|  | 1 | -1.115967000 | -1.630984000 | -0.784890000 |
|  | 1 | -1.177736000 | -3.387436000 | -0.747533000 |
|  | 1 | 1.384957000  | -1.730859000 | -0.906025000 |
|  | 6 | 0.610202000  | -2.479350000 | -2.739502000 |
|  | 1 | 1.298759000  | -3.480722000 | -0.968551000 |
|  | 6 | -0.138354000 | -3.648936000 | -3.348598000 |
|  | 1 | 1.601654000  | -2.404707000 | -3.183638000 |
|  | 1 | 0.113002000  | -1.540796000 | -2.988474000 |
|  | 8 | 1.437806000  | 2.089115000  | -0.397539000 |
|  | 6 | 1.192828000  | 1.062620000  | 0.602035000  |
|  | 1 | 0.130721000  | 0.835254000  | 0.600583000  |
|  | 6 | 1.649573000  | 1.584124000  | 1.932151000  |
|  | 1 | 1.748332000  | 0.171065000  | 0.310859000  |
|  | 1 | 1.115231000  | 2.511006000  | 2.149550000  |
|  | 6 | 3.144788000  | 1.812052000  | 2.019313000  |
|  | 1 | 1.325547000  | 0.865399000  | 2.687332000  |
|  | 1 | 3.451839000  | 2.510836000  | 1.238049000  |
|  | 1 | 3.666154000  | 0.874247000  | 1.805066000  |
|  | 6 | 3.588704000  | 2.339805000  | 3.368103000  |
|  | 1 | 3.276209000  | 1.642313000  | 4.148035000  |
|  | 1 | 3.063064000  | 3.273988000  | 3.577417000  |
|  | 6 | 5.084307000  | 2.565583000  | 3.449238000  |
|  | 8 | -3.375451000 | -2.142473000 | 3.362735000  |
|  | 6 | -2.942649000 | -2.852036000 | 4.541168000  |
|  | 1 | -3.647976000 | -2.585311000 | 5.324675000  |
|  | 1 | -1.960138000 | -2.488294000 | 4.839704000  |
|  | 6 | -2.934458000 | -4.337082000 | 4.296739000  |
|  | 6 | -2.538960000 | -5.107745000 | 5.540286000  |
|  | 1 | -2.248463000 | -4.559535000 | 3.479396000  |
|  | 1 | -3.926326000 | -4.646705000 | 3.963251000  |
|  | 1 | -1.547016000 | -4.787637000 | 5.870088000  |
|  | 6 | -2.534686000 | -6.609433000 | 5.331860000  |
|  | 1 | -3.220071000 | -4.859961000 | 6.359275000  |
|  | 1 | -3.525890000 | -6.927113000 | 5.002360000  |
|  | 6 | -2.137105000 | -7.373153000 | 6.577504000  |

|                                                                      |    |              |              |              |
|----------------------------------------------------------------------|----|--------------|--------------|--------------|
|                                                                      | 1  | -1.854921000 | -6.854448000 | 4.513634000  |
|                                                                      | 1  | 5.383998000  | 2.952416000  | 4.420247000  |
|                                                                      | 1  | 5.413383000  | 3.278266000  | 2.694223000  |
|                                                                      | 1  | 5.630789000  | 1.639013000  | 3.279928000  |
|                                                                      | 1  | 5.608422000  | 5.065516000  | -6.291319000 |
|                                                                      | 1  | 5.415015000  | 6.170827000  | -4.941928000 |
|                                                                      | 1  | 5.118025000  | 6.727852000  | -6.574752000 |
|                                                                      | 1  | -2.139681000 | -8.447305000 | 6.411269000  |
|                                                                      | 1  | -2.819939000 | -7.165238000 | 7.399764000  |
|                                                                      | 1  | -1.137928000 | -7.093100000 | 6.907099000  |
|                                                                      | 1  | -0.162754000 | -3.581903000 | -4.433986000 |
|                                                                      | 1  | -1.170020000 | -3.697689000 | -3.005576000 |
|                                                                      | 1  | 0.335204000  | -4.596265000 | -3.089708000 |
| Py-PO-iPr*Pb(NO <sub>3</sub> ) <sub>2</sub><br>(classical structure) | 6  | -1.483648000 | -0.638073000 | -0.034160000 |
|                                                                      | 6  | -2.355151000 | -1.168972000 | 0.904988000  |
|                                                                      | 6  | -1.866289000 | -1.481711000 | 2.160139000  |
|                                                                      | 6  | -0.530463000 | -1.249950000 | 2.432991000  |
|                                                                      | 6  | 0.271384000  | -0.720993000 | 1.431924000  |
|                                                                      | 7  | -0.196918000 | -0.425175000 | 0.223894000  |
|                                                                      | 1  | -2.515242000 | -1.897455000 | 2.914112000  |
|                                                                      | 1  | -3.390441000 | -1.326187000 | 0.648805000  |
|                                                                      | 1  | -0.105527000 | -1.476698000 | 3.397409000  |
|                                                                      | 15 | 2.025835000  | -0.382279000 | 1.668416000  |
|                                                                      | 15 | -2.022020000 | -0.149527000 | -1.682312000 |
|                                                                      | 8  | -3.304376000 | 0.735280000  | -1.516405000 |
|                                                                      | 8  | -0.912530000 | 0.487972000  | -2.430581000 |
|                                                                      | 8  | 2.618071000  | -1.588317000 | 2.482839000  |
|                                                                      | 8  | 2.693893000  | -0.098126000 | 0.380475000  |
|                                                                      | 6  | -3.359019000 | 2.166824000  | -1.169392000 |
|                                                                      | 6  | -2.780263000 | 2.402685000  | 0.198587000  |
|                                                                      | 6  | -2.734255000 | 3.007544000  | -2.249855000 |
|                                                                      | 1  | -4.433057000 | 2.335062000  | -1.149398000 |
|                                                                      | 1  | -1.707735000 | 2.221028000  | 0.222552000  |
|                                                                      | 1  | -3.267230000 | 1.778004000  | 0.944045000  |
|                                                                      | 1  | -1.661222000 | 2.860781000  | -2.311486000 |
|                                                                      | 1  | -3.170731000 | 2.780977000  | -3.219108000 |
|                                                                      | 8  | -2.597135000 | -1.480313000 | -2.246702000 |
|                                                                      | 6  | -2.799913000 | -1.789748000 | -3.671752000 |
|                                                                      | 6  | -3.405602000 | -0.622832000 | -4.406554000 |
|                                                                      | 6  | -1.500441000 | -2.267359000 | -4.255424000 |
|                                                                      | 1  | -3.515510000 | -2.606445000 | -3.622488000 |
|                                                                      | 1  | -2.703965000 | 0.206649000  | -4.467629000 |
|                                                                      | 1  | -4.318184000 | -0.280077000 | -3.928550000 |
|                                                                      | 1  | -0.774204000 | -1.460302000 | -4.302448000 |
|                                                                      | 1  | -1.082386000 | -3.078306000 | -3.667740000 |
|                                                                      | 6  | 4.404836000  | -2.618855000 | 1.180205000  |
|                                                                      | 6  | 2.052172000  | -3.511763000 | 1.061926000  |
|                                                                      | 6  | 3.106250000  | -2.848986000 | 1.907069000  |
|                                                                      | 1  | 4.247711000  | -2.041851000 | 0.274916000  |
|                                                                      | 1  | 5.115715000  | -2.093649000 | 1.812568000  |
|                                                                      | 1  | 1.136154000  | -3.670627000 | 1.625949000  |
|                                                                      | 1  | 1.819964000  | -2.941285000 | 0.163908000  |

|                                                                          |    |              |              |              |
|--------------------------------------------------------------------------|----|--------------|--------------|--------------|
|                                                                          | 1  | 3.286553000  | -3.438664000 | 2.802816000  |
|                                                                          | 1  | -1.669360000 | -2.631430000 | -5.266228000 |
|                                                                          | 1  | -3.644131000 | -0.931885000 | -5.421136000 |
|                                                                          | 1  | -2.918414000 | 4.056061000  | -2.029422000 |
|                                                                          | 1  | -2.930730000 | 3.442680000  | 0.476202000  |
|                                                                          | 1  | 4.837413000  | -3.578715000 | 0.908631000  |
|                                                                          | 1  | 2.414865000  | -4.484640000 | 0.739176000  |
|                                                                          | 82 | 1.415763000  | 0.510718000  | -1.756596000 |
|                                                                          | 7  | 0.523533000  | 3.296740000  | -0.818390000 |
|                                                                          | 8  | 0.549995000  | 2.210911000  | -0.132913000 |
|                                                                          | 8  | 0.135824000  | 4.326008000  | -0.299737000 |
|                                                                          | 8  | 0.888394000  | 3.233727000  | -2.010620000 |
|                                                                          | 7  | 1.418853000  | -2.342590000 | -2.871962000 |
|                                                                          | 8  | 1.814981000  | -1.470283000 | -3.672259000 |
|                                                                          | 8  | 1.460348000  | -3.531098000 | -3.115452000 |
|                                                                          | 8  | 0.939275000  | -1.938349000 | -1.748377000 |
|                                                                          | 8  | 1.980602000  | 0.757804000  | 2.730696000  |
|                                                                          | 6  | 3.047534000  | 1.735131000  | 2.982002000  |
|                                                                          | 6  | 4.388870000  | 1.057445000  | 3.087873000  |
|                                                                          | 6  | 2.993887000  | 2.816519000  | 1.937777000  |
|                                                                          | 1  | 2.760279000  | 2.137013000  | 3.950264000  |
|                                                                          | 1  | 4.689181000  | 0.640371000  | 2.128710000  |
|                                                                          | 1  | 4.376518000  | 0.263353000  | 3.828584000  |
|                                                                          | 1  | 3.297088000  | 2.429172000  | 0.968945000  |
|                                                                          | 1  | 1.991329000  | 3.220241000  | 1.841641000  |
|                                                                          | 1  | 3.671762000  | 3.619823000  | 2.217602000  |
|                                                                          | 1  | 5.136530000  | 1.789850000  | 3.381829000  |
| Py-PO-iPr*Pb(NO <sub>3</sub> ) <sub>2</sub><br>(non-classical structure) | 6  | -1.513069000 | 0.172156000  | 0.310691000  |
|                                                                          | 6  | -2.440702000 | -0.671234000 | 0.907064000  |
|                                                                          | 6  | -1.994365000 | -1.616975000 | 1.814062000  |
|                                                                          | 6  | -0.643669000 | -1.684155000 | 2.098907000  |
|                                                                          | 6  | 0.209343000  | -0.784611000 | 1.472920000  |
|                                                                          | 7  | -0.212908000 | 0.123217000  | 0.598763000  |
|                                                                          | 1  | -2.690068000 | -2.288482000 | 2.291427000  |
|                                                                          | 1  | -3.486998000 | -0.577713000 | 0.666149000  |
|                                                                          | 1  | -0.249493000 | -2.407092000 | 2.794833000  |
|                                                                          | 15 | 1.981837000  | -0.743509000 | 1.794058000  |
|                                                                          | 15 | -1.947785000 | 1.422909000  | -0.916428000 |
|                                                                          | 8  | -2.136500000 | 0.746488000  | -2.319191000 |
|                                                                          | 8  | 2.003428000  | -0.469881000 | 3.339478000  |
|                                                                          | 8  | -3.395362000 | 1.806870000  | -0.411179000 |
|                                                                          | 8  | -0.960719000 | 2.504071000  | -0.999843000 |
|                                                                          | 8  | 2.521684000  | -2.212420000 | 1.714675000  |
|                                                                          | 8  | 2.662622000  | 0.253660000  | 0.947780000  |
|                                                                          | 6  | -4.116516000 | 2.872832000  | -1.105877000 |
|                                                                          | 6  | -5.553337000 | 2.437302000  | -1.177162000 |
|                                                                          | 6  | -3.902216000 | 4.155058000  | -0.349543000 |
|                                                                          | 1  | -3.700168000 | 2.956675000  | -2.111045000 |
|                                                                          | 1  | -5.950039000 | 2.286184000  | -0.175642000 |
|                                                                          | 1  | -5.655104000 | 1.509061000  | -1.733567000 |
|                                                                          | 1  | -4.284920000 | 4.061576000  | 0.664490000  |
|                                                                          | 1  | -2.845645000 | 4.398442000  | -0.304697000 |

|                                             |    |              |              |              |
|---------------------------------------------|----|--------------|--------------|--------------|
|                                             | 6  | -2.317648000 | -1.636535000 | -2.629070000 |
|                                             | 6  | -3.069843000 | -0.332179000 | -2.605692000 |
|                                             | 6  | -3.695982000 | 0.007951000  | -3.930944000 |
|                                             | 1  | -3.002279000 | -2.448638000 | -2.865555000 |
|                                             | 1  | -1.852678000 | -1.849349000 | -1.670352000 |
|                                             | 1  | -3.830908000 | -0.334873000 | -1.821068000 |
|                                             | 1  | -4.216500000 | 0.961381000  | -3.885974000 |
|                                             | 1  | -4.407722000 | -0.761024000 | -4.220190000 |
|                                             | 6  | 4.457655000  | -2.366846000 | 0.245857000  |
|                                             | 6  | 2.130022000  | -2.717315000 | -0.655547000 |
|                                             | 6  | 3.066342000  | -2.870182000 | 0.510884000  |
|                                             | 1  | 4.447517000  | -1.335546000 | -0.088348000 |
|                                             | 1  | 5.077437000  | -2.456556000 | 1.134550000  |
|                                             | 1  | 1.129579000  | -3.068363000 | -0.410813000 |
|                                             | 1  | 2.079485000  | -1.688606000 | -1.001315000 |
|                                             | 1  | 3.096964000  | -3.908349000 | 0.833481000  |
|                                             | 6  | 3.200840000  | -0.929590000 | 5.339234000  |
|                                             | 6  | 3.540793000  | 1.227608000  | 4.078108000  |
|                                             | 6  | 3.294488000  | -0.254009000 | 4.000848000  |
|                                             | 1  | 2.396450000  | -0.491412000 | 5.925701000  |
|                                             | 1  | 3.010371000  | -1.992754000 | 5.228159000  |
|                                             | 1  | 3.568832000  | 1.665457000  | 3.085584000  |
|                                             | 1  | 2.754545000  | 1.708827000  | 4.655690000  |
|                                             | 1  | 4.062361000  | -0.733174000 | 3.392094000  |
|                                             | 82 | 1.762112000  | 1.746958000  | -0.971876000 |
|                                             | 7  | 4.514122000  | 0.967908000  | -1.558412000 |
|                                             | 8  | 5.605031000  | 0.454559000  | -1.650634000 |
|                                             | 8  | 4.347564000  | 2.152494000  | -1.176718000 |
|                                             | 8  | 3.457108000  | 0.296653000  | -1.844788000 |
|                                             | 7  | 0.668186000  | 0.428052000  | -3.303584000 |
|                                             | 8  | 0.213632000  | -0.173283000 | -4.248680000 |
|                                             | 8  | 1.168629000  | 1.575992000  | -3.410595000 |
|                                             | 8  | 0.648552000  | -0.085544000 | -2.129584000 |
|                                             | 1  | -6.152524000 | 3.197732000  | -1.670867000 |
|                                             | 1  | -4.426434000 | 4.971205000  | -0.840626000 |
|                                             | 1  | -2.923315000 | 0.070816000  | -4.692793000 |
|                                             | 1  | -1.533177000 | -1.597530000 | -3.378476000 |
|                                             | 1  | 4.910466000  | -2.962912000 | -0.542698000 |
|                                             | 1  | 2.497138000  | -3.310825000 | -1.488959000 |
|                                             | 1  | 4.130912000  | -0.801001000 | 5.886553000  |
|                                             | 1  | 4.492549000  | 1.422372000  | 4.566292000  |
| Py-PO-iPr*Cd(NO <sub>3</sub> ) <sub>2</sub> | 6  | -1.511001000 | -0.547706000 | 0.316577000  |
|                                             | 6  | -2.387464000 | -1.039510000 | 1.272266000  |
|                                             | 6  | -1.883106000 | -1.391515000 | 2.512485000  |
|                                             | 6  | -0.527850000 | -1.248623000 | 2.754605000  |
|                                             | 6  | 0.282170000  | -0.758999000 | 1.739539000  |
|                                             | 7  | -0.209341000 | -0.412350000 | 0.552667000  |
|                                             | 1  | -2.537331000 | -1.772767000 | 3.280256000  |
|                                             | 1  | -3.436601000 | -1.135207000 | 1.044118000  |
|                                             | 1  | -0.096052000 | -1.513238000 | 3.706750000  |
|                                             | 15 | 2.075511000  | -0.560620000 | 1.915612000  |
|                                             | 15 | -2.014049000 | -0.030443000 | -1.340042000 |

|    |              |              |              |
|----|--------------|--------------|--------------|
| 8  | 2.282957000  | 0.326709000  | 3.185816000  |
| 8  | -3.373526000 | 0.739345000  | -1.179903000 |
| 8  | -0.932959000 | 0.721018000  | -2.010111000 |
| 8  | 2.636450000  | -1.905283000 | 2.472132000  |
| 8  | 2.634420000  | -0.060264000 | 0.644454000  |
| 6  | -3.510809000 | 2.181078000  | -0.933855000 |
| 6  | -2.722622000 | 2.607076000  | 0.275549000  |
| 6  | -3.167412000 | 2.951102000  | -2.181250000 |
| 1  | -4.575645000 | 2.265080000  | -0.730074000 |
| 1  | -1.649716000 | 2.529438000  | 0.110717000  |
| 1  | -2.996119000 | 2.022003000  | 1.150867000  |
| 1  | -2.107875000 | 2.878686000  | -2.404980000 |
| 1  | -3.732980000 | 2.579869000  | -3.031540000 |
| 6  | 3.054300000  | 2.557238000  | 2.639084000  |
| 6  | 1.446493000  | 2.098245000  | 4.524023000  |
| 6  | 1.889177000  | 1.747255000  | 3.132790000  |
| 1  | 3.891966000  | 2.478430000  | 3.329004000  |
| 1  | 3.375137000  | 2.219026000  | 1.658675000  |
| 1  | 0.612871000  | 1.477663000  | 4.842568000  |
| 1  | 2.265402000  | 1.964325000  | 5.227042000  |
| 1  | 1.059167000  | 1.840329000  | 2.432920000  |
| 8  | -2.451743000 | -1.389623000 | -1.963034000 |
| 6  | -2.578692000 | -1.664674000 | -3.404523000 |
| 6  | -3.373085000 | -0.586361000 | -4.092580000 |
| 6  | -1.215110000 | -1.882182000 | -3.998728000 |
| 1  | -3.140745000 | -2.594853000 | -3.401493000 |
| 1  | -2.819391000 | 0.350356000  | -4.113964000 |
| 1  | -4.329329000 | -0.420253000 | -3.605632000 |
| 1  | -0.652206000 | -0.952679000 | -4.027547000 |
| 1  | -0.647853000 | -2.613348000 | -3.432668000 |
| 6  | 4.138416000  | -2.809639000 | 0.763897000  |
| 6  | 1.761511000  | -3.615125000 | 0.950729000  |
| 6  | 2.973842000  | -3.093428000 | 1.674216000  |
| 1  | 3.856220000  | -2.127973000 | -0.031610000 |
| 1  | 4.968867000  | -2.380677000 | 1.316664000  |
| 1  | 0.927189000  | -3.764023000 | 1.632101000  |
| 1  | 1.461701000  | -2.952833000 | 0.141114000  |
| 1  | 3.272169000  | -3.791039000 | 2.452434000  |
| 1  | -1.321467000 | -2.244795000 | -5.018485000 |
| 1  | -3.557217000 | -0.885050000 | -5.121483000 |
| 1  | -3.420457000 | 3.998867000  | -2.038277000 |
| 1  | -2.939452000 | 3.650075000  | 0.493216000  |
| 1  | 1.131878000  | 3.137704000  | 4.556750000  |
| 1  | 2.762510000  | 3.600631000  | 2.554145000  |
| 1  | 4.470829000  | -3.742558000 | 0.315137000  |
| 1  | 2.002440000  | -4.575257000 | 0.500894000  |
| 48 | 1.271469000  | 0.590394000  | -1.153397000 |
| 7  | 1.512357000  | 3.217572000  | -0.341312000 |
| 8  | 0.654336000  | 2.465882000  | 0.222236000  |
| 8  | 1.684105000  | 4.361935000  | 0.009498000  |
| 8  | 2.181803000  | 2.699528000  | -1.287246000 |
| 7  | 1.828971000  | -1.473249000 | -2.884249000 |

|                                             |    |              |              |              |
|---------------------------------------------|----|--------------|--------------|--------------|
|                                             | 8  | 2.132506000  | -0.256557000 | -3.100162000 |
|                                             | 8  | 2.068488000  | -2.339080000 | -3.693349000 |
|                                             | 8  | 1.251577000  | -1.725085000 | -1.782053000 |
| Py-PO-iPr*Cu(NO <sub>3</sub> ) <sub>2</sub> | 6  | -1.452014000 | -0.415724000 | 0.269342000  |
|                                             | 6  | -2.347101000 | -0.794437000 | 1.257405000  |
|                                             | 6  | -1.861743000 | -1.099490000 | 2.516400000  |
|                                             | 6  | -0.498687000 | -1.029643000 | 2.740785000  |
|                                             | 6  | 0.334610000  | -0.650026000 | 1.699653000  |
|                                             | 7  | -0.140429000 | -0.339496000 | 0.493223000  |
|                                             | 1  | -2.534064000 | -1.389821000 | 3.307868000  |
|                                             | 1  | -3.400378000 | -0.840641000 | 1.033688000  |
|                                             | 1  | -0.073768000 | -1.267565000 | 3.703000000  |
|                                             | 15 | 2.136625000  | -0.569313000 | 1.869411000  |
|                                             | 15 | -1.949257000 | 0.009033000  | -1.414848000 |
|                                             | 8  | 2.416658000  | 0.271926000  | 3.157949000  |
|                                             | 8  | -3.344449000 | 0.723721000  | -1.316414000 |
|                                             | 8  | -0.871506000 | 0.741045000  | -2.098617000 |
|                                             | 8  | 2.602701000  | -1.958577000 | 2.419985000  |
|                                             | 8  | 2.700329000  | -0.106835000 | 0.591063000  |
|                                             | 6  | -3.587285000 | 2.160530000  | -1.135872000 |
|                                             | 6  | -3.109941000 | 2.607869000  | 0.218097000  |
|                                             | 6  | -3.005213000 | 2.959122000  | -2.272220000 |
|                                             | 1  | -4.673356000 | 2.199656000  | -1.178805000 |
|                                             | 1  | -2.026025000 | 2.560828000  | 0.297805000  |
|                                             | 1  | -3.550961000 | 2.006873000  | 1.009951000  |
|                                             | 1  | -1.920894000 | 2.962016000  | -2.240638000 |
|                                             | 1  | -3.321561000 | 2.559348000  | -3.231869000 |
|                                             | 6  | 3.119362000  | 2.515494000  | 2.541833000  |
|                                             | 6  | 1.896550000  | 2.002659000  | 4.682396000  |
|                                             | 6  | 2.055835000  | 1.696949000  | 3.220602000  |
|                                             | 1  | 4.073323000  | 2.397439000  | 3.051992000  |
|                                             | 1  | 3.240980000  | 2.221630000  | 1.504044000  |
|                                             | 1  | 1.127549000  | 1.380642000  | 5.132700000  |
|                                             | 1  | 2.831927000  | 1.831862000  | 5.210444000  |
|                                             | 1  | 1.107971000  | 1.822156000  | 2.700397000  |
|                                             | 8  | -2.334114000 | -1.406404000 | -1.960459000 |
|                                             | 6  | -2.479380000 | -1.750475000 | -3.379371000 |
|                                             | 6  | -3.375067000 | -0.768417000 | -4.088692000 |
|                                             | 6  | -1.122327000 | -1.886488000 | -4.015509000 |
|                                             | 1  | -2.966754000 | -2.720774000 | -3.325566000 |
|                                             | 1  | -2.895544000 | 0.205258000  | -4.169865000 |
|                                             | 1  | -4.323655000 | -0.649745000 | -3.574357000 |
|                                             | 1  | -0.630532000 | -0.919572000 | -4.079612000 |
|                                             | 1  | -0.487039000 | -2.561302000 | -3.451406000 |
|                                             | 6  | 4.070939000  | -2.927149000 | 0.720652000  |
|                                             | 6  | 1.648152000  | -3.593621000 | 0.871512000  |
|                                             | 6  | 2.880409000  | -3.149796000 | 1.615264000  |
|                                             | 1  | 3.839308000  | -2.222976000 | -0.071722000 |
|                                             | 1  | 4.916119000  | -2.547957000 | 1.287310000  |
|                                             | 1  | 0.799841000  | -3.705087000 | 1.542705000  |
|                                             | 1  | 1.394672000  | -2.897341000 | 0.075798000  |
|                                             | 1  | 3.128664000  | -3.876210000 | 2.385066000  |

|                                             |    |              |              |              |
|---------------------------------------------|----|--------------|--------------|--------------|
|                                             | 1  | -1.235572000 | -2.280644000 | -5.022882000 |
|                                             | 1  | -3.569578000 | -1.127280000 | -5.096294000 |
|                                             | 1  | -3.358826000 | 3.984834000  | -2.199333000 |
|                                             | 1  | -3.405076000 | 3.642022000  | 0.379199000  |
|                                             | 1  | 1.613886000  | 3.043917000  | 4.810467000  |
|                                             | 1  | 2.838035000  | 3.565236000  | 2.565369000  |
|                                             | 1  | 4.358267000  | -3.874251000 | 0.270012000  |
|                                             | 1  | 1.838935000  | -4.557814000 | 0.406503000  |
|                                             | 29 | 1.186527000  | 0.384791000  | -1.048132000 |
|                                             | 7  | 0.938377000  | 2.982621000  | -0.032614000 |
|                                             | 8  | 0.159078000  | 2.422234000  | 0.749973000  |
|                                             | 8  | 1.184576000  | 4.168738000  | -0.004773000 |
|                                             | 8  | 1.528633000  | 2.262106000  | -0.927251000 |
|                                             | 7  | 1.991793000  | -1.124080000 | -2.781163000 |
|                                             | 8  | 2.265092000  | 0.106226000  | -2.801021000 |
|                                             | 8  | 2.345086000  | -1.906352000 | -3.618543000 |
|                                             | 8  | 1.281285000  | -1.483485000 | -1.772014000 |
| Py-PO-iPr*Zn(NO <sub>3</sub> ) <sub>2</sub> | 6  | -1.608168000 | -0.671579000 | 0.045664000  |
|                                             | 6  | -2.473850000 | -1.192827000 | 0.993298000  |
|                                             | 6  | -1.979235000 | -1.479064000 | 2.254367000  |
|                                             | 6  | -0.644436000 | -1.234337000 | 2.530511000  |
|                                             | 6  | 0.154025000  | -0.714983000 | 1.524709000  |
|                                             | 7  | -0.326314000 | -0.446829000 | 0.314894000  |
|                                             | 1  | -2.625891000 | -1.887564000 | 3.014255000  |
|                                             | 1  | -3.508030000 | -1.364933000 | 0.742987000  |
|                                             | 1  | -0.223707000 | -1.444731000 | 3.500330000  |
|                                             | 15 | 1.915434000  | -0.349799000 | 1.650973000  |
|                                             | 15 | -2.052203000 | -0.187425000 | -1.633919000 |
|                                             | 8  | -3.351767000 | 0.684743000  | -1.555204000 |
|                                             | 8  | -0.880775000 | 0.459202000  | -2.264653000 |
|                                             | 8  | 2.610823000  | -1.538303000 | 2.399167000  |
|                                             | 8  | 2.429833000  | -0.055569000 | 0.294840000  |
|                                             | 6  | -3.446413000 | 2.116555000  | -1.237453000 |
|                                             | 6  | -3.004267000 | 2.374465000  | 0.177469000  |
|                                             | 6  | -2.717444000 | 2.950565000  | -2.256885000 |
|                                             | 1  | -4.517601000 | 2.281003000  | -1.326513000 |
|                                             | 1  | -1.929224000 | 2.250265000  | 0.286384000  |
|                                             | 1  | -3.523317000 | 1.722876000  | 0.876584000  |
|                                             | 1  | -1.642847000 | 2.822284000  | -2.183999000 |
|                                             | 1  | -3.030731000 | 2.695537000  | -3.265569000 |
|                                             | 8  | -2.575659000 | -1.517723000 | -2.246929000 |
|                                             | 6  | -2.655644000 | -1.813878000 | -3.687974000 |
|                                             | 6  | -3.295556000 | -0.674910000 | -4.437473000 |
|                                             | 6  | -1.293128000 | -2.185234000 | -4.202599000 |
|                                             | 1  | -3.313076000 | -2.679254000 | -3.697783000 |
|                                             | 1  | -2.649923000 | 0.201336000  | -4.436607000 |
|                                             | 1  | -4.257681000 | -0.406457000 | -4.011959000 |
|                                             | 1  | -0.633070000 | -1.321510000 | -4.212040000 |
|                                             | 1  | -0.838564000 | -2.959811000 | -3.594559000 |
|                                             | 6  | 4.246474000  | -2.526863000 | 0.872067000  |
|                                             | 6  | 1.951393000  | -3.531008000 | 1.137238000  |
|                                             | 6  | 3.085420000  | -2.791765000 | 1.792927000  |



|                                                                       |    |              |              |              |
|-----------------------------------------------------------------------|----|--------------|--------------|--------------|
|                                                                       | 1  | 3.929565000  | -2.003123000 | -0.023805000 |
|                                                                       | 1  | 5.009976000  | -1.935734000 | 1.370545000  |
|                                                                       | 1  | 1.124807000  | -3.678978000 | 1.828313000  |
|                                                                       | 1  | 1.589974000  | -3.012145000 | 0.251496000  |
|                                                                       | 1  | 3.427158000  | -3.335153000 | 2.670465000  |
|                                                                       | 1  | -1.384732000 | -2.553117000 | -5.222082000 |
|                                                                       | 1  | -3.446954000 | -0.973032000 | -5.471864000 |
|                                                                       | 1  | -2.950495000 | 3.998538000  | -2.084633000 |
|                                                                       | 1  | -3.235879000 | 3.403255000  | 0.442649000  |
|                                                                       | 1  | 4.690552000  | -3.475341000 | 0.579747000  |
|                                                                       | 1  | 2.299325000  | -4.510155000 | 0.817340000  |
|                                                                       | 30 | 0.998559000  | 0.319338000  | -1.252614000 |
|                                                                       | 7  | 1.023583000  | 2.914057000  | -0.769831000 |
|                                                                       | 8  | 0.312772000  | 2.297812000  | 0.060485000  |
|                                                                       | 8  | 1.178208000  | 4.113946000  | -0.742878000 |
|                                                                       | 8  | 1.603018000  | 2.202852000  | -1.666390000 |
|                                                                       | 7  | 1.532645000  | -1.933986000 | -2.571331000 |
|                                                                       | 8  | 1.940734000  | -0.720866000 | -2.686960000 |
|                                                                       | 8  | 1.925613000  | -2.782325000 | -3.340238000 |
|                                                                       | 8  | 0.721685000  | -2.171665000 | -1.647552000 |
|                                                                       | 8  | 1.946171000  | 0.789791000  | 2.709877000  |
|                                                                       | 6  | 3.048545000  | 1.748466000  | 2.898483000  |
|                                                                       | 6  | 4.379789000  | 1.044930000  | 2.926748000  |
|                                                                       | 6  | 2.960464000  | 2.827431000  | 1.855288000  |
|                                                                       | 1  | 2.821645000  | 2.153975000  | 3.880950000  |
|                                                                       | 1  | 4.624920000  | 0.639557000  | 1.946705000  |
|                                                                       | 1  | 4.392768000  | 0.240368000  | 3.655695000  |
|                                                                       | 1  | 3.203778000  | 2.435294000  | 0.871005000  |
|                                                                       | 1  | 1.966693000  | 3.260260000  | 1.818788000  |
|                                                                       | 1  | 3.672156000  | 3.614466000  | 2.093969000  |
|                                                                       | 1  | 5.153346000  | 1.761668000  | 3.190471000  |
| Py-PO-cHex*Pb(NO <sub>3</sub> ) <sub>2</sub><br>(classical structure) | 6  | -1.096147000 | -0.740868000 | 0.904824000  |
|                                                                       | 6  | -1.706177000 | -1.715732000 | 1.679395000  |
|                                                                       | 6  | -0.913502000 | -2.674015000 | 2.284592000  |
|                                                                       | 6  | 0.454404000  | -2.620503000 | 2.095997000  |
|                                                                       | 6  | 0.983622000  | -1.610755000 | 1.303614000  |
|                                                                       | 7  | 0.220379000  | -0.693918000 | 0.712562000  |
|                                                                       | 1  | -1.354280000 | -3.444801000 | 2.896344000  |
|                                                                       | 1  | -2.777174000 | -1.711205000 | 1.801439000  |
|                                                                       | 1  | 1.113402000  | -3.340865000 | 2.553950000  |
|                                                                       | 15 | 2.762736000  | -1.458033000 | 1.024902000  |
|                                                                       | 15 | -2.042716000 | 0.553555000  | 0.087111000  |
|                                                                       | 8  | -1.156396000 | 1.409733000  | -0.737238000 |
|                                                                       | 8  | 3.248643000  | -2.818530000 | 0.431183000  |
|                                                                       | 8  | 3.026863000  | -0.228491000 | 0.252166000  |
|                                                                       | 6  | 3.780859000  | -2.470079000 | -1.949767000 |
|                                                                       | 6  | 3.674547000  | -3.137405000 | -3.314523000 |
|                                                                       | 6  | 2.222943000  | -3.364347000 | -3.703426000 |
|                                                                       | 6  | 1.498203000  | -4.172095000 | -2.640472000 |
|                                                                       | 6  | 1.607888000  | -3.506497000 | -1.275439000 |
|                                                                       | 6  | 3.065053000  | -3.319623000 | -0.929354000 |
|                                                                       | 1  | 3.317975000  | -1.485289000 | -1.985415000 |

|    |              |              |              |
|----|--------------|--------------|--------------|
| 1  | 4.820445000  | -2.338886000 | -1.653123000 |
| 1  | 4.201613000  | -4.096204000 | -3.290934000 |
| 1  | 4.178076000  | -2.525446000 | -4.060197000 |
| 1  | 2.166905000  | -3.875754000 | -4.663791000 |
| 1  | 1.728278000  | -2.400973000 | -3.827331000 |
| 1  | 1.926733000  | -5.177423000 | -2.584404000 |
| 1  | 0.448476000  | -4.300819000 | -2.901455000 |
| 1  | 1.116009000  | -4.105899000 | -0.508278000 |
| 1  | 1.119203000  | -2.531434000 | -1.314213000 |
| 1  | 3.546231000  | -4.296446000 | -0.873227000 |
| 82 | 1.274363000  | 1.500188000  | -0.518663000 |
| 7  | 0.669897000  | 3.035844000  | 2.078620000  |
| 8  | 0.542564000  | 3.502386000  | 3.195038000  |
| 8  | 0.576320000  | 1.767991000  | 1.902660000  |
| 8  | 0.884782000  | 3.743937000  | 1.073045000  |
| 7  | 0.942139000  | 0.421080000  | -3.325366000 |
| 8  | 0.911796000  | -0.121401000 | -4.414609000 |
| 8  | 0.865826000  | 1.658930000  | -3.188489000 |
| 8  | 1.051595000  | -0.290308000 | -2.262276000 |
| 8  | 3.445369000  | -1.601066000 | 2.422518000  |
| 6  | 2.251775000  | -0.237723000 | 4.086792000  |
| 6  | 2.471092000  | 0.708645000  | 5.260077000  |
| 6  | 3.236612000  | 1.948127000  | 4.830709000  |
| 6  | 4.549143000  | 1.575005000  | 4.164093000  |
| 6  | 4.313712000  | 0.642754000  | 2.984611000  |
| 6  | 3.581281000  | -0.585782000 | 3.465643000  |
| 1  | 1.619364000  | 0.257285000  | 3.347012000  |
| 1  | 1.743139000  | -1.146381000 | 4.410847000  |
| 1  | 3.029110000  | 0.187463000  | 6.043826000  |
| 1  | 1.510212000  | 0.983552000  | 5.689840000  |
| 1  | 3.416482000  | 2.593619000  | 5.689151000  |
| 1  | 2.619334000  | 2.520788000  | 4.137312000  |
| 1  | 5.202342000  | 1.082495000  | 4.890373000  |
| 1  | 5.077489000  | 2.464952000  | 3.827568000  |
| 1  | 5.249603000  | 0.356038000  | 2.507667000  |
| 1  | 3.709901000  | 1.150660000  | 2.233197000  |
| 1  | 4.199984000  | -1.103824000 | 4.198852000  |
| 8  | -3.211383000 | -0.148449000 | -0.685722000 |
| 6  | -2.055508000 | -1.713030000 | -2.213079000 |
| 6  | -2.188760000 | -2.363887000 | -3.584623000 |
| 6  | -2.222963000 | -1.326378000 | -4.695030000 |
| 6  | -3.306494000 | -0.290039000 | -4.452645000 |
| 6  | -3.149224000 | 0.357206000  | -3.084148000 |
| 6  | -3.175957000 | -0.720482000 | -2.028469000 |
| 1  | -1.095099000 | -1.195713000 | -2.148569000 |
| 1  | -2.084247000 | -2.465132000 | -1.422866000 |
| 1  | -3.107275000 | -2.957803000 | -3.609256000 |
| 1  | -1.364800000 | -3.057811000 | -3.741044000 |
| 1  | -2.378584000 | -1.816128000 | -5.655501000 |
| 1  | -1.253959000 | -0.831439000 | -4.750754000 |
| 1  | -4.290248000 | -0.765358000 | -4.511575000 |
| 1  | -3.285090000 | 0.473913000  | -5.227099000 |

|                                                                            |    |              |              |              |
|----------------------------------------------------------------------------|----|--------------|--------------|--------------|
|                                                                            | 1  | -3.945648000 | 1.076096000  | -2.894132000 |
|                                                                            | 1  | -2.201405000 | 0.893951000  | -3.024584000 |
|                                                                            | 1  | -4.131534000 | -1.244113000 | -2.076453000 |
|                                                                            | 8  | -2.786234000 | 1.206031000  | 1.287107000  |
|                                                                            | 6  | -4.169730000 | 2.796529000  | -0.021590000 |
|                                                                            | 6  | -4.862241000 | 4.149621000  | 0.068898000  |
|                                                                            | 6  | -3.874163000 | 5.251714000  | 0.411042000  |
|                                                                            | 6  | -3.139026000 | 4.935259000  | 1.701523000  |
|                                                                            | 6  | -2.449692000 | 3.582795000  | 1.618986000  |
|                                                                            | 6  | -3.452171000 | 2.512494000  | 1.276720000  |
|                                                                            | 1  | -3.439334000 | 2.820166000  | -0.834052000 |
|                                                                            | 1  | -4.880975000 | 2.003133000  | -0.244311000 |
|                                                                            | 1  | -5.636296000 | 4.107125000  | 0.839960000  |
|                                                                            | 1  | -5.372945000 | 4.361712000  | -0.868741000 |
|                                                                            | 1  | -4.388377000 | 6.208490000  | 0.488447000  |
|                                                                            | 1  | -3.150135000 | 5.349820000  | -0.401431000 |
|                                                                            | 1  | -3.853634000 | 4.929779000  | 2.529614000  |
|                                                                            | 1  | -2.404020000 | 5.702755000  | 1.932260000  |
|                                                                            | 1  | -1.953123000 | 3.337528000  | 2.554759000  |
|                                                                            | 1  | -1.686315000 | 3.608398000  | 0.840064000  |
|                                                                            | 1  | -4.181739000 | 2.415040000  | 2.080755000  |
| Py-PO-cHex *Pb(NO <sub>3</sub> ) <sub>2</sub><br>(non-classical structure) | 6  | -1.160616000 | -0.362708000 | -0.228925000 |
|                                                                            | 6  | -1.730152000 | -1.619395000 | -0.357583000 |
|                                                                            | 6  | -1.004838000 | -2.720238000 | 0.065302000  |
|                                                                            | 6  | 0.268907000  | -2.530678000 | 0.565338000  |
|                                                                            | 6  | 0.770607000  | -1.236759000 | 0.627453000  |
|                                                                            | 7  | 0.062995000  | -0.171276000 | 0.262835000  |
|                                                                            | 1  | -1.416135000 | -3.713067000 | -0.022826000 |
|                                                                            | 1  | -2.706307000 | -1.727172000 | -0.799636000 |
|                                                                            | 1  | 0.884953000  | -3.361179000 | 0.869297000  |
|                                                                            | 15 | 2.469533000  | -0.869394000 | 1.118125000  |
|                                                                            | 15 | -1.898881000 | 1.170318000  | -0.826050000 |
|                                                                            | 8  | -0.926034000 | 1.993662000  | -1.559502000 |
|                                                                            | 8  | 3.327526000  | -2.129862000 | 0.799434000  |
|                                                                            | 8  | 2.889919000  | 0.408121000  | 0.501764000  |
|                                                                            | 6  | 3.139067000  | -2.989464000 | -1.480392000 |
|                                                                            | 6  | 3.877084000  | -3.142818000 | -2.802756000 |
|                                                                            | 6  | 5.219886000  | -3.824799000 | -2.607322000 |
|                                                                            | 6  | 6.062958000  | -3.075067000 | -1.589836000 |
|                                                                            | 6  | 5.322679000  | -2.932479000 | -0.267135000 |
|                                                                            | 6  | 4.010174000  | -2.239710000 | -0.506760000 |
|                                                                            | 1  | 2.906832000  | -3.972357000 | -1.058596000 |
|                                                                            | 1  | 2.201816000  | -2.460323000 | -1.642100000 |
|                                                                            | 1  | 4.030210000  | -2.150350000 | -3.228002000 |
|                                                                            | 1  | 3.257643000  | -3.693440000 | -3.508134000 |
|                                                                            | 1  | 5.749176000  | -3.898132000 | -3.555828000 |
|                                                                            | 1  | 5.060618000  | -4.849271000 | -2.257763000 |
|                                                                            | 1  | 6.293422000  | -2.081128000 | -1.978719000 |
|                                                                            | 1  | 7.014792000  | -3.577343000 | -1.426512000 |
|                                                                            | 1  | 5.911213000  | -2.370870000 | 0.456090000  |
|                                                                            | 1  | 5.127612000  | -3.917384000 | 0.164263000  |
|                                                                            | 1  | 4.178696000  | -1.228400000 | -0.868358000 |

|   |              |              |              |
|---|--------------|--------------|--------------|
| 8 | 2.494569000  | -0.907219000 | 2.689628000  |
| 6 | 2.877311000  | 1.169371000  | 3.858590000  |
| 6 | 2.229550000  | 2.260519000  | 4.696415000  |
| 6 | 1.478550000  | 1.665120000  | 5.874388000  |
| 6 | 0.440841000  | 0.662965000  | 5.399232000  |
| 6 | 1.077202000  | -0.429755000 | 4.553702000  |
| 6 | 1.836846000  | 0.177349000  | 3.402496000  |
| 1 | 3.619079000  | 0.634132000  | 4.455131000  |
| 1 | 3.392663000  | 1.578599000  | 2.992548000  |
| 1 | 1.532468000  | 2.828045000  | 4.073853000  |
| 1 | 2.984793000  | 2.967478000  | 5.033121000  |
| 1 | 1.007250000  | 2.448585000  | 6.465365000  |
| 1 | 2.188815000  | 1.160088000  | 6.533739000  |
| 1 | -0.308044000 | 1.186555000  | 4.799984000  |
| 1 | -0.090329000 | 0.222571000  | 6.241276000  |
| 1 | 0.327832000  | -1.125249000 | 4.175307000  |
| 1 | 1.777341000  | -1.011113000 | 5.156809000  |
| 1 | 1.134916000  | 0.673790000  | 2.723523000  |
| 8 | -3.136815000 | 0.641264000  | -1.631249000 |
| 6 | -2.609728000 | 0.763632000  | -4.015928000 |
| 6 | -3.137959000 | 1.218109000  | -5.366512000 |
| 6 | -3.422361000 | 2.709964000  | -5.362274000 |
| 6 | -4.393108000 | 3.072626000  | -4.250853000 |
| 6 | -3.868432000 | 2.620499000  | -2.895389000 |
| 6 | -3.588198000 | 1.138062000  | -2.930899000 |
| 1 | -1.656712000 | 1.252149000  | -3.814949000 |
| 1 | -2.431548000 | -0.309908000 | -4.003982000 |
| 1 | -4.059749000 | 0.677854000  | -5.602014000 |
| 1 | -2.420425000 | 0.959177000  | -6.141305000 |
| 1 | -3.817607000 | 3.025182000  | -6.326589000 |
| 1 | -2.486447000 | 3.252754000  | -5.213171000 |
| 1 | -5.356332000 | 2.592397000  | -4.445143000 |
| 1 | -4.582058000 | 4.144270000  | -4.233049000 |
| 1 | -4.581576000 | 2.847490000  | -2.102676000 |
| 1 | -2.941430000 | 3.146932000  | -2.664603000 |
| 1 | -4.523424000 | 0.596584000  | -3.077586000 |
| 8 | -2.429662000 | 1.983502000  | 0.410624000  |
| 6 | -2.406990000 | 1.033727000  | 2.638913000  |
| 6 | -3.264961000 | 0.741637000  | 3.859604000  |
| 6 | -4.395505000 | -0.211368000 | 3.511310000  |
| 6 | -5.233587000 | 0.341615000  | 2.371824000  |
| 6 | -4.378092000 | 0.629579000  | 1.147444000  |
| 6 | -3.263883000 | 1.581007000  | 1.519353000  |
| 1 | -1.922778000 | 0.113865000  | 2.302845000  |
| 1 | -1.616755000 | 1.747527000  | 2.866893000  |
| 1 | -3.688253000 | 1.677342000  | 4.233633000  |
| 1 | -2.650365000 | 0.338548000  | 4.662395000  |
| 1 | -5.016747000 | -0.400362000 | 4.384856000  |
| 1 | -3.972623000 | -1.174881000 | 3.213854000  |
| 1 | -5.717032000 | 1.265881000  | 2.697944000  |
| 1 | -6.033451000 | -0.347323000 | 2.108082000  |
| 1 | -4.973328000 | 1.045253000  | 0.337448000  |

|                                                |    |              |              |              |
|------------------------------------------------|----|--------------|--------------|--------------|
|                                                | 1  | -3.947900000 | -0.304205000 | 0.781329000  |
|                                                | 1  | -3.707781000 | 2.522223000  | 1.846560000  |
|                                                | 82 | 1.812190000  | 1.578502000  | -1.562970000 |
|                                                | 7  | 4.466500000  | 1.340407000  | -2.775697000 |
|                                                | 8  | 5.578236000  | 1.128187000  | -3.192945000 |
|                                                | 8  | 3.996294000  | 2.497443000  | -2.637523000 |
|                                                | 8  | 3.700885000  | 0.363554000  | -2.442642000 |
|                                                | 7  | 0.712804000  | -0.196585000 | -3.575447000 |
|                                                | 8  | 0.216445000  | -0.951541000 | -4.376997000 |
|                                                | 8  | 1.053392000  | 0.978652000  | -3.871908000 |
|                                                | 8  | 0.899849000  | -0.560087000 | -2.362882000 |
| Py-PO- cHex *Cd(NO <sub>3</sub> ) <sub>2</sub> | 6  | -1.287212000 | -0.853176000 | 0.926037000  |
|                                                | 6  | -1.857340000 | -1.868018000 | 1.679468000  |
|                                                | 6  | -1.025992000 | -2.823696000 | 2.237867000  |
|                                                | 6  | 0.339550000  | -2.732786000 | 2.033552000  |
|                                                | 6  | 0.829958000  | -1.681038000 | 1.273047000  |
|                                                | 7  | 0.026174000  | -0.770303000 | 0.729307000  |
|                                                | 1  | -1.437123000 | -3.626916000 | 2.828372000  |
|                                                | 1  | -2.925679000 | -1.900682000 | 1.819729000  |
|                                                | 1  | 1.019300000  | -3.454458000 | 2.457848000  |
|                                                | 15 | 2.595294000  | -1.421541000 | 0.958808000  |
|                                                | 15 | -2.236795000 | 0.466543000  | 0.135342000  |
|                                                | 8  | -1.346812000 | 1.355982000  | -0.638021000 |
|                                                | 8  | 3.151985000  | -2.749336000 | 0.357308000  |
|                                                | 8  | 2.768561000  | -0.187447000 | 0.165466000  |
|                                                | 6  | 3.711932000  | -2.296614000 | -2.002217000 |
|                                                | 6  | 3.667120000  | -2.918588000 | -3.391159000 |
|                                                | 6  | 2.239983000  | -3.229572000 | -3.810244000 |
|                                                | 6  | 1.558573000  | -4.121823000 | -2.787149000 |
|                                                | 6  | 1.595151000  | -3.488463000 | -1.402970000 |
|                                                | 6  | 3.030612000  | -3.219564000 | -1.021478000 |
|                                                | 1  | 3.199167000  | -1.336401000 | -2.009013000 |
|                                                | 1  | 4.736982000  | -2.113868000 | -1.683733000 |
|                                                | 1  | 4.256265000  | -3.840607000 | -3.393698000 |
|                                                | 1  | 4.137545000  | -2.246883000 | -4.105855000 |
|                                                | 1  | 2.231313000  | -3.705618000 | -4.789905000 |
|                                                | 1  | 1.681244000  | -2.297888000 | -3.906678000 |
|                                                | 1  | 2.061341000  | -5.092962000 | -2.750646000 |
|                                                | 1  | 0.527489000  | -4.321376000 | -3.074541000 |
|                                                | 1  | 1.125094000  | -4.134969000 | -0.660914000 |
|                                                | 1  | 1.047970000  | -2.543988000 | -1.431407000 |
|                                                | 1  | 3.571537000  | -4.165272000 | -0.981612000 |
|                                                | 48 | 0.982626000  | 1.148521000  | -0.497645000 |
|                                                | 7  | 0.991864000  | 3.139692000  | 1.420790000  |
|                                                | 8  | 0.953979000  | 4.055096000  | 2.214423000  |
|                                                | 8  | 0.794793000  | 1.938391000  | 1.778138000  |
|                                                | 8  | 1.224070000  | 3.336166000  | 0.188483000  |
|                                                | 7  | 1.277387000  | 0.455674000  | -3.155773000 |
|                                                | 8  | 1.420318000  | 0.200259000  | -4.332097000 |
|                                                | 8  | 1.709363000  | 1.533784000  | -2.649331000 |
|                                                | 8  | 0.686592000  | -0.348224000 | -2.368196000 |
|                                                | 8  | 3.315077000  | -1.503144000 | 2.340051000  |

|   |              |              |              |
|---|--------------|--------------|--------------|
| 6 | 2.038701000  | -0.195034000 | 3.985370000  |
| 6 | 2.189844000  | 0.790520000  | 5.136610000  |
| 6 | 2.870064000  | 2.069842000  | 4.678459000  |
| 6 | 4.210425000  | 1.766816000  | 4.031124000  |
| 6 | 4.049552000  | 0.793662000  | 2.871895000  |
| 6 | 3.390145000  | -0.467859000 | 3.373365000  |
| 1 | 1.385967000  | 0.244999000  | 3.230614000  |
| 1 | 1.587213000  | -1.128061000 | 4.324267000  |
| 1 | 2.781133000  | 0.327431000  | 5.932265000  |
| 1 | 1.211659000  | 1.006981000  | 5.562102000  |
| 1 | 3.003347000  | 2.744228000  | 5.523270000  |
| 1 | 2.225557000  | 2.583905000  | 3.964496000  |
| 1 | 4.885555000  | 1.335131000  | 4.776264000  |
| 1 | 4.683681000  | 2.680699000  | 3.678073000  |
| 1 | 5.009244000  | 0.553215000  | 2.417229000  |
| 1 | 3.426192000  | 1.242700000  | 2.100581000  |
| 1 | 4.034768000  | -0.941577000 | 4.113875000  |
| 8 | -3.392840000 | -0.209715000 | -0.681500000 |
| 6 | -2.249110000 | -1.932518000 | -2.018312000 |
| 6 | -2.220661000 | -2.589459000 | -3.390990000 |
| 6 | -1.925167000 | -1.571036000 | -4.478098000 |
| 6 | -2.935603000 | -0.437094000 | -4.438896000 |
| 6 | -2.956816000 | 0.226974000  | -3.069135000 |
| 6 | -3.256747000 | -0.808374000 | -2.012031000 |
| 1 | -1.258172000 | -1.527972000 | -1.802977000 |
| 1 | -2.496979000 | -2.657985000 | -1.242369000 |
| 1 | -3.187275000 | -3.064195000 | -3.584705000 |
| 1 | -1.478859000 | -3.386062000 | -3.396924000 |
| 1 | -1.933009000 | -2.050950000 | -5.455686000 |
| 1 | -0.922226000 | -1.167363000 | -4.330258000 |
| 1 | -3.931271000 | -0.826227000 | -4.672445000 |
| 1 | -2.706650000 | 0.306163000  | -5.199713000 |
| 1 | -3.702366000 | 1.020510000  | -3.027150000 |
| 1 | -1.987207000 | 0.676535000  | -2.864164000 |
| 1 | -4.253379000 | -1.217458000 | -2.180049000 |
| 8 | -2.992565000 | 1.080806000  | 1.351926000  |
| 6 | -4.213792000 | 2.910668000  | 0.232203000  |
| 6 | -4.694825000 | 4.342800000  | 0.424274000  |
| 6 | -3.535202000 | 5.280594000  | 0.715413000  |
| 6 | -2.741851000 | 4.809206000  | 1.922051000  |
| 6 | -2.257534000 | 3.382027000  | 1.724856000  |
| 6 | -3.431613000 | 2.477821000  | 1.448549000  |
| 1 | -3.564928000 | 2.857823000  | -0.644958000 |
| 1 | -5.049389000 | 2.232760000  | 0.063661000  |
| 1 | -5.402737000 | 4.373845000  | 1.257158000  |
| 1 | -5.243940000 | 4.666337000  | -0.458103000 |
| 1 | -3.900836000 | 6.294408000  | 0.871055000  |
| 1 | -2.874156000 | 5.316470000  | -0.153658000 |
| 1 | -3.371500000 | 4.866526000  | 2.814752000  |
| 1 | -1.885770000 | 5.455217000  | 2.101813000  |
| 1 | -1.702935000 | 3.024744000  | 2.589844000  |
| 1 | -1.581728000 | 3.348086000  | 0.870254000  |

|                                                |    |              |              |              |
|------------------------------------------------|----|--------------|--------------|--------------|
|                                                | 1  | -4.092665000 | 2.453603000  | 2.314699000  |
| Py-PO- cHex *Cu(NO <sub>3</sub> ) <sub>2</sub> | 6  | -1.110819000 | -0.827408000 | 0.712251000  |
|                                                | 6  | -1.700457000 | -1.932534000 | 1.303825000  |
|                                                | 6  | -0.888735000 | -2.938938000 | 1.797143000  |
|                                                | 6  | 0.482872000  | -2.799822000 | 1.697275000  |
|                                                | 6  | 1.000633000  | -1.659650000 | 1.100536000  |
|                                                | 7  | 0.213163000  | -0.702102000 | 0.611057000  |
|                                                | 1  | -1.319170000 | -3.814186000 | 2.257050000  |
|                                                | 1  | -2.774666000 | -1.993058000 | 1.366994000  |
|                                                | 1  | 1.153249000  | -3.553848000 | 2.077778000  |
|                                                | 15 | 2.778166000  | -1.329085000 | 0.984257000  |
|                                                | 15 | -2.051635000 | 0.567384000  | 0.052369000  |
|                                                | 8  | -1.184285000 | 1.427246000  | -0.768897000 |
|                                                | 8  | 3.452775000  | -2.614022000 | 0.409986000  |
|                                                | 8  | 2.964794000  | -0.050107000 | 0.280912000  |
|                                                | 6  | 3.828019000  | -2.016429000 | -1.967921000 |
|                                                | 6  | 3.923875000  | -2.636367000 | -3.355497000 |
|                                                | 6  | 2.628976000  | -3.331200000 | -3.741243000 |
|                                                | 6  | 2.243975000  | -4.374833000 | -2.706135000 |
|                                                | 6  | 2.152300000  | -3.757638000 | -1.317525000 |
|                                                | 6  | 3.460489000  | -3.089605000 | -0.972702000 |
|                                                | 1  | 3.070520000  | -1.234746000 | -1.963276000 |
|                                                | 1  | 4.765891000  | -1.545419000 | -1.679209000 |
|                                                | 1  | 4.743342000  | -3.361236000 | -3.371255000 |
|                                                | 1  | 4.176516000  | -1.865743000 | -4.080436000 |
|                                                | 1  | 2.728375000  | -3.793679000 | -4.722397000 |
|                                                | 1  | 1.830993000  | -2.592112000 | -3.822769000 |
|                                                | 1  | 2.991041000  | -5.173943000 | -2.696885000 |
|                                                | 1  | 1.294265000  | -4.841067000 | -2.963395000 |
|                                                | 1  | 1.912166000  | -4.510534000 | -0.566037000 |
|                                                | 1  | 1.358471000  | -3.009965000 | -1.314851000 |
|                                                | 1  | 4.251548000  | -3.839609000 | -0.948226000 |
|                                                | 29 | 1.054412000  | 1.025526000  | -0.343962000 |
|                                                | 7  | 1.356022000  | 3.096261000  | 0.906527000  |
|                                                | 8  | 1.463218000  | 4.092739000  | 1.568534000  |
|                                                | 8  | 0.940739000  | 1.990556000  | 1.411563000  |
|                                                | 8  | 1.628065000  | 3.029574000  | -0.320881000 |
|                                                | 7  | 0.812451000  | -0.220246000 | -2.839315000 |
|                                                | 8  | 0.845947000  | -0.219256000 | -4.054472000 |
|                                                | 8  | 1.360932000  | 0.767966000  | -2.219031000 |
|                                                | 8  | 0.297708000  | -1.124873000 | -2.171446000 |
|                                                | 8  | 3.337251000  | -1.449164000 | 2.443422000  |
|                                                | 6  | 1.810899000  | -0.156820000 | 3.876913000  |
|                                                | 6  | 1.771445000  | 0.823590000  | 5.040158000  |
|                                                | 6  | 2.513583000  | 2.103489000  | 4.697689000  |
|                                                | 6  | 3.945814000  | 1.803208000  | 4.289696000  |
|                                                | 6  | 3.987529000  | 0.829322000  | 3.121141000  |
|                                                | 6  | 3.243786000  | -0.432489000 | 3.487480000  |
|                                                | 1  | 1.283539000  | 0.283756000  | 3.030289000  |
|                                                | 1  | 1.311093000  | -1.091210000 | 4.134646000  |
|                                                | 1  | 2.228446000  | 0.359915000  | 5.919305000  |
|                                                | 1  | 0.736727000  | 1.034528000  | 5.305027000  |

|                                                |   |              |              |              |
|------------------------------------------------|---|--------------|--------------|--------------|
|                                                | 1 | 2.496603000  | 2.788445000  | 5.544291000  |
|                                                | 1 | 2.003725000  | 2.606411000  | 3.873975000  |
|                                                | 1 | 4.485988000  | 1.378360000  | 5.140992000  |
|                                                | 1 | 4.467012000  | 2.719241000  | 4.018997000  |
|                                                | 1 | 5.011829000  | 0.583146000  | 2.845759000  |
|                                                | 1 | 3.519612000  | 1.280451000  | 2.248164000  |
|                                                | 1 | 3.751058000  | -0.918169000 | 4.321762000  |
|                                                | 8 | -3.341585000 | -0.010327000 | -0.627438000 |
|                                                | 6 | -2.870267000 | -1.953276000 | -2.035403000 |
|                                                | 6 | -3.102429000 | -2.565304000 | -3.409246000 |
|                                                | 6 | -2.564083000 | -1.662043000 | -4.505257000 |
|                                                | 6 | -3.189804000 | -0.281108000 | -4.414842000 |
|                                                | 6 | -2.934262000 | 0.339457000  | -3.049062000 |
|                                                | 6 | -3.475308000 | -0.572420000 | -1.974266000 |
|                                                | 1 | -1.797759000 | -1.876658000 | -1.860222000 |
|                                                | 1 | -3.299722000 | -2.577782000 | -1.251060000 |
|                                                | 1 | -4.174607000 | -2.722407000 | -3.560655000 |
|                                                | 1 | -2.636583000 | -3.548507000 | -3.452938000 |
|                                                | 1 | -2.756213000 | -2.101271000 | -5.483297000 |
|                                                | 1 | -1.481298000 | -1.569884000 | -4.402640000 |
|                                                | 1 | -4.267401000 | -0.355204000 | -4.590359000 |
|                                                | 1 | -2.791971000 | 0.371820000  | -5.188712000 |
|                                                | 1 | -3.396194000 | 1.322775000  | -2.967441000 |
|                                                | 1 | -1.865022000 | 0.478719000  | -2.908467000 |
|                                                | 1 | -4.558338000 | -0.646223000 | -2.080214000 |
|                                                | 8 | -2.618358000 | 1.174519000  | 1.379722000  |
|                                                | 6 | -4.114804000 | 2.904036000  | 0.455119000  |
|                                                | 6 | -4.652974000 | 4.303680000  | 0.715909000  |
|                                                | 6 | -3.526475000 | 5.320055000  | 0.790316000  |
|                                                | 6 | -2.506826000 | 4.923551000  | 1.844476000  |
|                                                | 6 | -1.968477000 | 3.525805000  | 1.582483000  |
|                                                | 6 | -3.112211000 | 2.542453000  | 1.525065000  |
|                                                | 1 | -3.618290000 | 2.881256000  | -0.518181000 |
|                                                | 1 | -4.916871000 | 2.168476000  | 0.428423000  |
|                                                | 1 | -5.203560000 | 4.306266000  | 1.660565000  |
|                                                | 1 | -5.368581000 | 4.573344000  | -0.058714000 |
|                                                | 1 | -3.925151000 | 6.311816000  | 0.998342000  |
|                                                | 1 | -3.031082000 | 5.378761000  | -0.181706000 |
|                                                | 1 | -2.977898000 | 4.954348000  | 2.831234000  |
|                                                | 1 | -1.681724000 | 5.631878000  | 1.873376000  |
|                                                | 1 | -1.256032000 | 3.223423000  | 2.346854000  |
|                                                | 1 | -1.445511000 | 3.505783000  | 0.625907000  |
|                                                | 1 | -3.614411000 | 2.510196000  | 2.492328000  |
| Py-PO- cHex *Zn(NO <sub>3</sub> ) <sub>2</sub> | 6 | -1.239056000 | -0.806743000 | 0.975007000  |
|                                                | 6 | -1.801611000 | -1.810888000 | 1.744562000  |
|                                                | 6 | -0.969040000 | -2.781654000 | 2.276881000  |
|                                                | 6 | 0.391448000  | -2.715066000 | 2.032324000  |
|                                                | 6 | 0.877244000  | -1.670606000 | 1.260938000  |
|                                                | 7 | 0.069766000  | -0.748948000 | 0.742265000  |
|                                                | 1 | -1.376292000 | -3.577981000 | 2.879114000  |
|                                                | 1 | -2.865472000 | -1.826922000 | 1.916932000  |
|                                                | 1 | 1.070655000  | -3.448393000 | 2.436705000  |



|    |              |              |              |
|----|--------------|--------------|--------------|
| 15 | 2.621578000  | -1.373267000 | 0.885446000  |
| 15 | -2.144294000 | 0.530452000  | 0.169330000  |
| 8  | -1.182451000 | 1.351841000  | -0.598281000 |
| 8  | 3.208745000  | -2.670158000 | 0.250345000  |
| 8  | 2.678541000  | -0.126306000 | 0.092033000  |
| 6  | 3.634726000  | -2.175752000 | -2.128758000 |
| 6  | 3.553114000  | -2.783211000 | -3.522345000 |
| 6  | 2.127202000  | -3.176122000 | -3.870599000 |
| 6  | 1.555763000  | -4.121433000 | -2.827662000 |
| 6  | 1.629788000  | -3.509765000 | -1.435624000 |
| 6  | 3.060476000  | -3.144790000 | -1.125206000 |
| 1  | 3.068145000  | -1.248071000 | -2.098139000 |
| 1  | 4.662924000  | -1.937262000 | -1.861436000 |
| 1  | 4.198285000  | -3.665426000 | -3.574706000 |
| 1  | 3.940397000  | -2.072464000 | -4.249092000 |
| 1  | 2.095935000  | -3.641209000 | -4.855133000 |
| 1  | 1.510562000  | -2.277685000 | -3.925427000 |
| 1  | 2.116947000  | -5.060568000 | -2.837364000 |
| 1  | 0.523665000  | -4.378297000 | -3.061992000 |
| 1  | 1.250303000  | -4.199748000 | -0.680769000 |
| 1  | 1.016903000  | -2.607896000 | -1.410854000 |
| 1  | 3.665919000  | -4.051476000 | -1.111734000 |
| 30 | 0.902512000  | 0.937386000  | -0.381643000 |
| 7  | 0.890162000  | 2.695570000  | 1.729722000  |
| 8  | 0.994351000  | 3.718830000  | 2.376506000  |
| 8  | 0.361910000  | 1.660649000  | 2.178834000  |
| 8  | 1.344821000  | 2.663571000  | 0.527170000  |
| 7  | 1.099074000  | 0.489751000  | -2.913012000 |
| 8  | 1.216630000  | 0.389705000  | -4.113917000 |
| 8  | 1.452682000  | 1.536163000  | -2.286706000 |
| 8  | 0.617611000  | -0.441497000 | -2.202308000 |
| 8  | 3.412709000  | -1.426743000 | 2.224422000  |
| 6  | 2.180326000  | -0.403627000 | 4.081700000  |
| 6  | 2.334246000  | 0.528514000  | 5.275747000  |
| 6  | 2.745053000  | 1.920861000  | 4.828843000  |
| 6  | 4.015709000  | 1.873823000  | 3.997411000  |
| 6  | 3.863533000  | 0.939227000  | 2.804216000  |
| 6  | 3.467653000  | -0.429614000 | 3.297728000  |
| 1  | 1.376688000  | -0.030400000 | 3.445219000  |
| 1  | 1.921603000  | -1.413402000 | 4.402609000  |
| 1  | 3.089947000  | 0.121859000  | 5.954530000  |
| 1  | 1.401048000  | 0.563430000  | 5.834976000  |
| 1  | 2.887733000  | 2.565930000  | 5.694820000  |
| 1  | 1.942586000  | 2.362929000  | 4.238117000  |
| 1  | 4.847691000  | 1.532211000  | 4.620679000  |
| 1  | 4.278316000  | 2.868643000  | 3.644639000  |
| 1  | 4.787239000  | 0.874398000  | 2.231647000  |
| 1  | 3.099787000  | 1.322881000  | 2.130269000  |
| 1  | 4.264243000  | -0.829888000 | 3.925109000  |
| 8  | -3.310662000 | -0.111684000 | -0.659309000 |
| 6  | -2.292666000 | -1.955890000 | -1.928204000 |
| 6  | -2.289111000 | -2.647457000 | -3.284410000 |

|                                                                     |    |              |              |              |
|---------------------------------------------------------------------|----|--------------|--------------|--------------|
|                                                                     | 6  | -1.886881000 | -1.683490000 | -4.387521000 |
|                                                                     | 6  | -2.802273000 | -0.471409000 | -4.398984000 |
|                                                                     | 6  | -2.798470000 | 0.229019000  | -3.047301000 |
|                                                                     | 6  | -3.200468000 | -0.751302000 | -1.971740000 |
|                                                                     | 1  | -1.277589000 | -1.629035000 | -1.699397000 |
|                                                                     | 1  | -2.617506000 | -2.637423000 | -1.140883000 |
|                                                                     | 1  | -3.287896000 | -3.043574000 | -3.490698000 |
|                                                                     | 1  | -1.617281000 | -3.503989000 | -3.254117000 |
|                                                                     | 1  | -1.913307000 | -2.185594000 | -5.353730000 |
|                                                                     | 1  | -0.858933000 | -1.355320000 | -4.226246000 |
|                                                                     | 1  | -3.821072000 | -0.787074000 | -4.643711000 |
|                                                                     | 1  | -2.499480000 | 0.230551000  | -5.172949000 |
|                                                                     | 1  | -3.481776000 | 1.077848000  | -3.042719000 |
|                                                                     | 1  | -1.802172000 | 0.609581000  | -2.832820000 |
|                                                                     | 1  | -4.224913000 | -1.080417000 | -2.148882000 |
|                                                                     | 8  | -2.901108000 | 1.200607000  | 1.350153000  |
|                                                                     | 6  | -4.111070000 | 2.948449000  | 0.091248000  |
|                                                                     | 6  | -4.632120000 | 4.375862000  | 0.193242000  |
|                                                                     | 6  | -3.505914000 | 5.352334000  | 0.487070000  |
|                                                                     | 6  | -2.759920000 | 4.955721000  | 1.749255000  |
|                                                                     | 6  | -2.235018000 | 3.532469000  | 1.645722000  |
|                                                                     | 6  | -3.376230000 | 2.590283000  | 1.360898000  |
|                                                                     | 1  | -3.420901000 | 2.874779000  | -0.752759000 |
|                                                                     | 1  | -4.922059000 | 2.243714000  | -0.085629000 |
|                                                                     | 1  | -5.375211000 | 4.429468000  | 0.993559000  |
|                                                                     | 1  | -5.149314000 | 4.642912000  | -0.726565000 |
|                                                                     | 1  | -3.896977000 | 6.364813000  | 0.574980000  |
|                                                                     | 1  | -2.807390000 | 5.357204000  | -0.352899000 |
|                                                                     | 1  | -3.431885000 | 5.039053000  | 2.608465000  |
|                                                                     | 1  | -1.928902000 | 5.631078000  | 1.938841000  |
|                                                                     | 1  | -1.716503000 | 3.229761000  | 2.551508000  |
|                                                                     | 1  | -1.518077000 | 3.471707000  | 0.825870000  |
|                                                                     | 1  | -4.075624000 | 2.591101000  | 2.196573000  |
| Py-PO-C5*Pb(NO <sub>3</sub> ) <sub>2</sub><br>(classical structure) | 6  | -3.086650000 | -1.620276000 | 1.944559000  |
|                                                                     | 6  | -3.968746000 | -1.100766000 | 1.040245000  |
|                                                                     | 6  | -3.490830000 | -0.317559000 | -0.018147000 |
|                                                                     | 6  | -2.096517000 | -0.106658000 | -0.107239000 |
|                                                                     | 7  | -1.239393000 | -0.639763000 | 0.778821000  |
|                                                                     | 6  | -1.720111000 | -1.362657000 | 1.773776000  |
|                                                                     | 6  | -4.365057000 | 0.259844000  | -0.975918000 |
|                                                                     | 6  | -1.584926000 | 0.713690000  | -1.170941000 |
|                                                                     | 6  | -2.491486000 | 1.278782000  | -2.096387000 |
|                                                                     | 6  | -3.883556000 | 1.028943000  | -1.978186000 |
|                                                                     | 6  | -1.968946000 | 2.086993000  | -3.113920000 |
|                                                                     | 1  | -2.640139000 | 2.534260000  | -3.831648000 |
|                                                                     | 6  | -0.620214000 | 2.293760000  | -3.183176000 |
|                                                                     | 6  | 0.202118000  | 1.681063000  | -2.228174000 |
|                                                                     | 7  | -0.262955000 | 0.925253000  | -1.251781000 |
|                                                                     | 1  | -5.423682000 | 0.071790000  | -0.881311000 |
|                                                                     | 1  | -3.415341000 | -2.219531000 | 2.777964000  |
|                                                                     | 1  | -5.030010000 | -1.278684000 | 1.128331000  |
|                                                                     | 15 | -0.532242000 | -2.036200000 | 2.959013000  |

|  |    |              |              |              |
|--|----|--------------|--------------|--------------|
|  | 1  | -4.546833000 | 1.472088000  | -2.705272000 |
|  | 1  | -0.178050000 | 2.902042000  | -3.955396000 |
|  | 15 | 1.994135000  | 1.894241000  | -2.330090000 |
|  | 8  | 2.675011000  | 1.033423000  | -1.347513000 |
|  | 8  | 0.829615000  | -1.574577000 | 2.642453000  |
|  | 8  | -0.791145000 | -3.578226000 | 2.995608000  |
|  | 6  | -0.249642000 | -4.454515000 | 1.963545000  |
|  | 1  | -0.241379000 | -5.434874000 | 2.429080000  |
|  | 1  | 0.771032000  | -4.153563000 | 1.746127000  |
|  | 6  | -1.094164000 | -4.444012000 | 0.719288000  |
|  | 6  | -0.642622000 | -5.497694000 | -0.273280000 |
|  | 1  | -1.027592000 | -3.463974000 | 0.242230000  |
|  | 1  | -2.141686000 | -4.597704000 | 0.990502000  |
|  | 1  | 0.423056000  | -5.373588000 | -0.468160000 |
|  | 6  | -1.395189000 | -5.415521000 | -1.587610000 |
|  | 1  | -0.769598000 | -6.492686000 | 0.162628000  |
|  | 1  | -2.460607000 | -5.584942000 | -1.409273000 |
|  | 6  | -0.872179000 | -6.396240000 | -2.614831000 |
|  | 1  | -1.305156000 | -4.400814000 | -1.980348000 |
|  | 82 | 1.443781000  | -0.389104000 | 0.426172000  |
|  | 7  | 1.477623000  | 1.941136000  | 2.385510000  |
|  | 8  | 2.553299000  | 1.320993000  | 2.272813000  |
|  | 8  | 1.274053000  | 2.738068000  | 3.286700000  |
|  | 8  | 0.564208000  | 1.719768000  | 1.512416000  |
|  | 7  | 1.144391000  | -2.881369000 | -1.416779000 |
|  | 8  | 1.621477000  | -3.071803000 | -0.272652000 |
|  | 8  | 1.252395000  | -3.711604000 | -2.305824000 |
|  | 8  | 0.535916000  | -1.782843000 | -1.628001000 |
|  | 8  | 2.230026000  | 3.439370000  | -2.235540000 |
|  | 6  | 1.876675000  | 4.125922000  | -1.000042000 |
|  | 1  | 0.970566000  | 3.681706000  | -0.583306000 |
|  | 1  | 1.645924000  | 5.140333000  | -1.311841000 |
|  | 6  | 2.991066000  | 4.090122000  | 0.006500000  |
|  | 6  | 2.629562000  | 4.913289000  | 1.229375000  |
|  | 1  | 3.904745000  | 4.467932000  | -0.454350000 |
|  | 1  | 3.183768000  | 3.057357000  | 0.296053000  |
|  | 1  | 2.524788000  | 5.965276000  | 0.946703000  |
|  | 6  | 3.642609000  | 4.785395000  | 2.350061000  |
|  | 1  | 1.652793000  | 4.599544000  | 1.604995000  |
|  | 1  | 3.739485000  | 3.733005000  | 2.616622000  |
|  | 6  | 3.245952000  | 5.584165000  | 3.572917000  |
|  | 1  | 4.622712000  | 5.107503000  | 1.989867000  |
|  | 8  | 2.383307000  | 1.672690000  | -3.830987000 |
|  | 6  | 2.645258000  | 0.320805000  | -4.307998000 |
|  | 1  | 3.256456000  | -0.191296000 | -3.568137000 |
|  | 1  | 3.236104000  | 0.464384000  | -5.206920000 |
|  | 6  | 1.371187000  | -0.427671000 | -4.582207000 |
|  | 6  | 1.632438000  | -1.837220000 | -5.076229000 |
|  | 1  | 0.771900000  | 0.128698000  | -5.306892000 |
|  | 1  | 0.789217000  | -0.504442000 | -3.663700000 |
|  | 1  | 2.197594000  | -1.813376000 | -6.012679000 |
|  | 6  | 0.348534000  | -2.621177000 | -5.265251000 |

|                                                                         |    |              |              |              |
|-------------------------------------------------------------------------|----|--------------|--------------|--------------|
|                                                                         | 1  | 2.251928000  | -2.362724000 | -4.346912000 |
|                                                                         | 1  | -0.196655000 | -2.607977000 | -4.321202000 |
|                                                                         | 6  | 0.601462000  | -4.053580000 | -5.682722000 |
|                                                                         | 1  | -0.279547000 | -2.116569000 | -6.004533000 |
|                                                                         | 8  | -1.090113000 | -1.663166000 | 4.374205000  |
|                                                                         | 6  | -0.741416000 | -0.388304000 | 4.982768000  |
|                                                                         | 1  | 0.339413000  | -0.273694000 | 4.944650000  |
|                                                                         | 1  | -1.044323000 | -0.501508000 | 6.018875000  |
|                                                                         | 6  | -1.439598000 | 0.769660000  | 4.324829000  |
|                                                                         | 6  | -1.225337000 | 2.059363000  | 5.092701000  |
|                                                                         | 1  | -2.507107000 | 0.548448000  | 4.245770000  |
|                                                                         | 1  | -1.060246000 | 0.903264000  | 3.309124000  |
|                                                                         | 1  | -1.674729000 | 1.980022000  | 6.086850000  |
|                                                                         | 6  | -1.791627000 | 3.261203000  | 4.362854000  |
|                                                                         | 1  | -0.156104000 | 2.214004000  | 5.241364000  |
|                                                                         | 1  | -1.366172000 | 3.281076000  | 3.359420000  |
|                                                                         | 6  | -1.487558000 | 4.563922000  | 5.071294000  |
|                                                                         | 1  | -2.872059000 | 3.139635000  | 4.246581000  |
|                                                                         | 1  | 3.141280000  | 6.643287000  | 3.337838000  |
|                                                                         | 1  | 3.980908000  | 5.494578000  | 4.369083000  |
|                                                                         | 1  | 2.292370000  | 5.232746000  | 3.962552000  |
|                                                                         | 1  | -1.890731000 | 4.569650000  | 6.083439000  |
|                                                                         | 1  | -1.906641000 | 5.417959000  | 4.544504000  |
|                                                                         | 1  | -0.412193000 | 4.716314000  | 5.143875000  |
|                                                                         | 1  | 1.188123000  | -4.569242000 | -4.925602000 |
|                                                                         | 1  | 1.150444000  | -4.102638000 | -6.622836000 |
|                                                                         | 1  | -0.326463000 | -4.605610000 | -5.814441000 |
|                                                                         | 1  | -1.415755000 | -6.324579000 | -3.554134000 |
|                                                                         | 1  | -0.956865000 | -7.423147000 | -2.260772000 |
|                                                                         | 1  | 0.177177000  | -6.199090000 | -2.822352000 |
| Py-PO-C5*Pb(NO <sub>3</sub> ) <sub>2</sub><br>(non-classical structure) | 6  | -3.849601000 | -2.061116000 | 0.664455000  |
|                                                                         | 6  | -4.494421000 | -1.560833000 | -0.435415000 |
|                                                                         | 6  | -3.835832000 | -0.651619000 | -1.272882000 |
|                                                                         | 6  | -2.505487000 | -0.310180000 | -0.947038000 |
|                                                                         | 7  | -1.874561000 | -0.825843000 | 0.114810000  |
|                                                                         | 6  | -2.530912000 | -1.658618000 | 0.900180000  |
|                                                                         | 6  | -4.450469000 | -0.080063000 | -2.419541000 |
|                                                                         | 6  | -1.790366000 | 0.615474000  | -1.782581000 |
|                                                                         | 6  | -2.436292000 | 1.156324000  | -2.915341000 |
|                                                                         | 6  | -3.777757000 | 0.790363000  | -3.208209000 |
|                                                                         | 6  | -1.700782000 | 2.035406000  | -3.719860000 |
|                                                                         | 1  | -2.166081000 | 2.472264000  | -4.590914000 |
|                                                                         | 6  | -0.394820000 | 2.302136000  | -3.407678000 |
|                                                                         | 6  | 0.161770000  | 1.691073000  | -2.275466000 |
|                                                                         | 7  | -0.521297000 | 0.901856000  | -1.468948000 |
|                                                                         | 1  | -5.466437000 | -0.362581000 | -2.650697000 |
|                                                                         | 1  | -4.325965000 | -2.758115000 | 1.333332000  |
|                                                                         | 1  | -5.506530000 | -1.856933000 | -0.667432000 |
|                                                                         | 15 | -1.620050000 | -2.153907000 | 2.371813000  |
|                                                                         | 1  | -4.246871000 | 1.215962000  | -4.082505000 |
|                                                                         | 1  | 0.212938000  | 2.945495000  | -4.022616000 |
|                                                                         | 15 | 1.911229000  | 1.887488000  | -1.870186000 |

|  |   |              |              |              |
|--|---|--------------|--------------|--------------|
|  | 8 | 2.387750000  | 0.798830000  | -1.006153000 |
|  | 8 | -0.188461000 | -1.820095000 | 2.303987000  |
|  | 8 | -2.054994000 | -3.644423000 | 2.538276000  |
|  | 6 | -1.520386000 | -4.442100000 | 3.633673000  |
|  | 1 | -2.288236000 | -5.183650000 | 3.833877000  |
|  | 1 | -1.423134000 | -3.807996000 | 4.515088000  |
|  | 6 | -0.215822000 | -5.073307000 | 3.243507000  |
|  | 6 | 0.317816000  | -5.988472000 | 4.329388000  |
|  | 1 | 0.510980000  | -4.291272000 | 3.023492000  |
|  | 1 | -0.362475000 | -5.627528000 | 2.319806000  |
|  | 1 | 0.337020000  | -5.457044000 | 5.284375000  |
|  | 6 | 1.711714000  | -6.510937000 | 4.018752000  |
|  | 1 | -0.364059000 | -6.833271000 | 4.462905000  |
|  | 6 | 1.789034000  | -7.302833000 | 2.727437000  |
|  | 1 | 2.049638000  | -7.128718000 | 4.851678000  |
|  | 1 | 2.400784000  | -5.665577000 | 3.967402000  |
|  | 8 | 2.060310000  | 3.349295000  | -1.293128000 |
|  | 6 | 1.448847000  | 3.646655000  | -0.023028000 |
|  | 1 | 1.587576000  | 2.801167000  | 0.651307000  |
|  | 1 | 0.377133000  | 3.789093000  | -0.177616000 |
|  | 6 | 2.088796000  | 4.889799000  | 0.524028000  |
|  | 6 | 1.447116000  | 5.332213000  | 1.823315000  |
|  | 1 | 2.013554000  | 5.683157000  | -0.220647000 |
|  | 1 | 3.152530000  | 4.701970000  | 0.672207000  |
|  | 1 | 0.386500000  | 5.537866000  | 1.656461000  |
|  | 6 | 2.109826000  | 6.558846000  | 2.418871000  |
|  | 1 | 1.481376000  | 4.514698000  | 2.549791000  |
|  | 1 | 3.166297000  | 6.344641000  | 2.589913000  |
|  | 6 | 1.461713000  | 7.013000000  | 3.710095000  |
|  | 1 | 2.084005000  | 7.368440000  | 1.686886000  |
|  | 8 | 2.658049000  | 2.102292000  | -3.229504000 |
|  | 6 | 3.193562000  | 0.972600000  | -3.972548000 |
|  | 1 | 3.427647000  | 0.169767000  | -3.276251000 |
|  | 1 | 4.123242000  | 1.339314000  | -4.397947000 |
|  | 6 | 2.238284000  | 0.526745000  | -5.043759000 |
|  | 6 | 2.869446000  | -0.509474000 | -5.952947000 |
|  | 1 | 1.929438000  | 1.397929000  | -5.626485000 |
|  | 1 | 1.339498000  | 0.109060000  | -4.587045000 |
|  | 1 | 3.753046000  | -0.084039000 | -6.438209000 |
|  | 6 | 1.906669000  | -1.020558000 | -7.005662000 |
|  | 1 | 3.217443000  | -1.352841000 | -5.354505000 |
|  | 1 | 1.028464000  | -1.423746000 | -6.502032000 |
|  | 6 | 2.525744000  | -2.083368000 | -7.888669000 |
|  | 1 | 1.560987000  | -0.182032000 | -7.616029000 |
|  | 8 | -2.355601000 | -1.451834000 | 3.591758000  |
|  | 6 | -1.877359000 | -0.190661000 | 4.099604000  |
|  | 1 | -0.817920000 | -0.284331000 | 4.328456000  |
|  | 1 | -2.423713000 | -0.044840000 | 5.027436000  |
|  | 6 | -2.124053000 | 0.948740000  | 3.144149000  |
|  | 6 | -1.816320000 | 2.287684000  | 3.784283000  |
|  | 1 | -3.167132000 | 0.923059000  | 2.820759000  |
|  | 1 | -1.512541000 | 0.814049000  | 2.249771000  |

|                                            |    |              |              |              |
|--------------------------------------------|----|--------------|--------------|--------------|
|                                            | 1  | -2.452864000 | 2.424514000  | 4.662533000  |
|                                            | 6  | -2.011743000 | 3.459553000  | 2.841861000  |
|                                            | 1  | -0.787896000 | 2.291549000  | 4.155378000  |
|                                            | 1  | -1.327718000 | 3.356240000  | 1.995415000  |
|                                            | 6  | -1.799864000 | 4.793694000  | 3.525927000  |
|                                            | 1  | -3.018248000 | 3.416054000  | 2.420216000  |
|                                            | 82 | 0.935928000  | -1.426756000 | -0.171254000 |
|                                            | 7  | 1.218320000  | -2.197718000 | -2.999059000 |
|                                            | 8  | 1.287456000  | -2.552317000 | -4.155714000 |
|                                            | 8  | 0.313422000  | -1.386718000 | -2.614229000 |
|                                            | 8  | 2.036618000  | -2.594089000 | -2.126412000 |
|                                            | 7  | 0.267961000  | -4.285376000 | -0.012507000 |
|                                            | 8  | -0.095580000 | -5.439347000 | -0.051605000 |
|                                            | 8  | -0.494125000 | -3.355088000 | -0.467984000 |
|                                            | 8  | 1.367844000  | -3.934295000 | 0.472090000  |
|                                            | 1  | 1.958743000  | 7.886537000  | 4.123587000  |
|                                            | 1  | 1.495826000  | 6.227707000  | 4.464056000  |
|                                            | 1  | 0.414961000  | 7.270334000  | 3.556677000  |
|                                            | 1  | -2.502264000 | 4.925569000  | 4.347334000  |
|                                            | 1  | -1.933449000 | 5.628349000  | 2.841595000  |
|                                            | 1  | -0.796146000 | 4.867471000  | 3.940993000  |
|                                            | 1  | 1.828406000  | -2.437761000 | -8.643777000 |
|                                            | 1  | 2.836006000  | -2.942074000 | -7.296713000 |
|                                            | 1  | 3.406817000  | -1.704223000 | -8.405401000 |
|                                            | 1  | 1.073006000  | -8.124868000 | 2.730587000  |
|                                            | 1  | 2.779093000  | -7.731124000 | 2.590989000  |
|                                            | 1  | 1.578454000  | -6.685814000 | 1.857569000  |
| Py-PO-C5*Cd(NO <sub>3</sub> ) <sub>2</sub> | 6  | -3.452790000 | -1.607911000 | 1.933294000  |
|                                            | 6  | -4.335699000 | -1.030501000 | 1.060203000  |
|                                            | 6  | -3.853672000 | -0.237011000 | 0.009710000  |
|                                            | 6  | -2.457357000 | -0.064962000 | -0.085562000 |
|                                            | 7  | -1.604665000 | -0.632773000 | 0.775028000  |
|                                            | 6  | -2.082398000 | -1.384128000 | 1.748098000  |
|                                            | 6  | -4.704986000 | 0.383863000  | -0.944094000 |
|                                            | 6  | -1.918931000 | 0.739733000  | -1.144730000 |
|                                            | 6  | -2.794729000 | 1.338897000  | -2.073129000 |
|                                            | 6  | -4.196117000 | 1.139855000  | -1.946346000 |
|                                            | 6  | -2.222106000 | 2.116806000  | -3.089436000 |
|                                            | 1  | -2.862166000 | 2.589531000  | -3.819343000 |
|                                            | 6  | -0.862074000 | 2.268838000  | -3.141452000 |
|                                            | 6  | -0.076828000 | 1.631101000  | -2.171203000 |
|                                            | 7  | -0.592501000 | 0.892523000  | -1.209118000 |
|                                            | 1  | -5.770523000 | 0.236982000  | -0.852882000 |
|                                            | 1  | -3.788981000 | -2.230096000 | 2.746780000  |
|                                            | 1  | -5.399731000 | -1.181637000 | 1.164426000  |
|                                            | 15 | -0.821059000 | -2.136289000 | 2.801457000  |
|                                            | 1  | -4.848313000 | 1.607508000  | -2.668298000 |
|                                            | 1  | -0.389327000 | 2.862473000  | -3.907085000 |
|                                            | 15 | 1.724535000  | 1.777513000  | -2.134113000 |
|                                            | 8  | 2.271658000  | 0.911963000  | -1.076553000 |
|                                            | 8  | 0.516154000  | -1.778956000 | 2.301069000  |
|                                            | 8  | -1.166106000 | -3.663349000 | 2.867975000  |

|    |              |              |              |
|----|--------------|--------------|--------------|
| 6  | -0.617830000 | -4.563187000 | 1.863642000  |
| 1  | -0.781891000 | -5.553453000 | 2.276064000  |
| 1  | 0.452499000  | -4.383486000 | 1.793536000  |
| 6  | -1.289117000 | -4.395604000 | 0.528982000  |
| 6  | -0.761714000 | -5.382180000 | -0.494321000 |
| 1  | -1.109834000 | -3.386361000 | 0.155260000  |
| 1  | -2.369312000 | -4.509460000 | 0.649696000  |
| 1  | 0.324639000  | -5.295510000 | -0.554825000 |
| 6  | -1.342619000 | -5.145063000 | -1.873978000 |
| 1  | -0.975094000 | -6.405164000 | -0.171024000 |
| 1  | -2.429670000 | -5.256099000 | -1.833678000 |
| 6  | -0.759328000 | -6.078617000 | -2.912299000 |
| 1  | -1.142365000 | -4.110789000 | -2.157948000 |
| 48 | 0.901075000  | -0.351288000 | 0.415315000  |
| 7  | 1.537268000  | 1.664749000  | 2.235585000  |
| 8  | 2.262525000  | 0.653856000  | 2.054876000  |
| 8  | 1.810902000  | 2.509354000  | 3.071196000  |
| 8  | 0.494774000  | 1.769839000  | 1.511694000  |
| 7  | 1.404100000  | -2.587132000 | -1.186002000 |
| 8  | 2.220047000  | -2.164863000 | -0.326070000 |
| 8  | 1.651809000  | -3.550367000 | -1.890699000 |
| 8  | 0.299957000  | -1.962479000 | -1.291707000 |
| 8  | 2.008345000  | 3.314628000  | -2.052664000 |
| 6  | 1.635226000  | 4.035609000  | -0.844089000 |
| 1  | 0.789191000  | 3.542184000  | -0.363632000 |
| 1  | 1.314081000  | 5.012941000  | -1.193969000 |
| 6  | 2.793202000  | 4.141749000  | 0.105798000  |
| 6  | 2.445353000  | 5.038741000  | 1.278034000  |
| 1  | 3.658604000  | 4.534108000  | -0.430637000 |
| 1  | 3.063919000  | 3.145348000  | 0.457702000  |
| 1  | 2.201621000  | 6.040983000  | 0.911418000  |
| 6  | 3.561332000  | 5.129822000  | 2.299358000  |
| 1  | 1.549416000  | 4.656789000  | 1.770818000  |
| 1  | 3.797638000  | 4.124423000  | 2.646774000  |
| 6  | 3.190539000  | 6.000972000  | 3.480518000  |
| 1  | 4.463130000  | 5.514725000  | 1.817328000  |
| 8  | 2.244398000  | 1.509198000  | -3.586094000 |
| 6  | 2.639024000  | 0.162691000  | -3.968801000 |
| 1  | 3.226795000  | -0.267422000 | -3.161415000 |
| 1  | 3.281339000  | 0.307367000  | -4.831771000 |
| 6  | 1.448773000  | -0.694049000 | -4.300395000 |
| 6  | 1.874902000  | -2.053900000 | -4.818887000 |
| 1  | 0.833828000  | -0.182150000 | -5.044482000 |
| 1  | 0.832123000  | -0.829739000 | -3.409114000 |
| 1  | 2.460330000  | -1.929494000 | -5.734746000 |
| 6  | 0.699782000  | -2.973142000 | -5.085706000 |
| 1  | 2.532344000  | -2.531159000 | -4.090235000 |
| 1  | 0.144635000  | -3.103271000 | -4.155419000 |
| 6  | 1.137169000  | -4.321991000 | -5.615518000 |
| 1  | 0.019217000  | -2.494172000 | -5.794665000 |
| 8  | -1.163202000 | -1.729200000 | 4.273897000  |
| 6  | -0.602822000 | -0.509045000 | 4.836620000  |

|                                            |    |              |              |              |
|--------------------------------------------|----|--------------|--------------|--------------|
|                                            | 1  | 0.466689000  | -0.502109000 | 4.639481000  |
|                                            | 1  | -0.762555000 | -0.613719000 | 5.904996000  |
|                                            | 6  | -1.265450000 | 0.726202000  | 4.293137000  |
|                                            | 6  | -0.769198000 | 1.974530000  | 4.999039000  |
|                                            | 1  | -2.349109000 | 0.633211000  | 4.397325000  |
|                                            | 1  | -1.050260000 | 0.818942000  | 3.226961000  |
|                                            | 1  | -1.095033000 | 1.962449000  | 6.043001000  |
|                                            | 6  | -1.237486000 | 3.248480000  | 4.323816000  |
|                                            | 1  | 0.321872000  | 1.972810000  | 5.011577000  |
|                                            | 1  | -0.894848000 | 3.230430000  | 3.288916000  |
|                                            | 6  | -0.714437000 | 4.489784000  | 5.014304000  |
|                                            | 1  | -2.330507000 | 3.265622000  | 4.295620000  |
|                                            | 1  | 2.955943000  | 7.017551000  | 3.165801000  |
|                                            | 1  | 3.996158000  | 6.058020000  | 4.208410000  |
|                                            | 1  | 2.313710000  | 5.603489000  | 3.988922000  |
|                                            | 1  | -1.052798000 | 4.543265000  | 6.048645000  |
|                                            | 1  | -1.039300000 | 5.398914000  | 4.513584000  |
|                                            | 1  | 0.374079000  | 4.488582000  | 5.023708000  |
|                                            | 1  | 1.778215000  | -4.826234000 | -4.894729000 |
|                                            | 1  | 1.700250000  | -4.217658000 | -6.542412000 |
|                                            | 1  | 0.289743000  | -4.973326000 | -5.814239000 |
|                                            | 1  | -1.185597000 | -5.902713000 | -3.897312000 |
|                                            | 1  | -0.939031000 | -7.122077000 | -2.654868000 |
|                                            | 1  | 0.316607000  | -5.934656000 | -2.987702000 |
| Py-PO-C5*Cu(NO <sub>3</sub> ) <sub>2</sub> | 6  | -3.375706000 | -1.646675000 | 1.910011000  |
|                                            | 6  | -4.270514000 | -1.149739000 | 1.000364000  |
|                                            | 6  | -3.811576000 | -0.347417000 | -0.053905000 |
|                                            | 6  | -2.427870000 | -0.096609000 | -0.117204000 |
|                                            | 7  | -1.561332000 | -0.591880000 | 0.773696000  |
|                                            | 6  | -2.016089000 | -1.340760000 | 1.759247000  |
|                                            | 6  | -4.667648000 | 0.208244000  | -1.043512000 |
|                                            | 6  | -1.905975000 | 0.713908000  | -1.173562000 |
|                                            | 6  | -2.780036000 | 1.244798000  | -2.140440000 |
|                                            | 6  | -4.172012000 | 0.972580000  | -2.046823000 |
|                                            | 6  | -2.212546000 | 2.021309000  | -3.160957000 |
|                                            | 1  | -2.849003000 | 2.444299000  | -3.923812000 |
|                                            | 6  | -0.858736000 | 2.226548000  | -3.179727000 |
|                                            | 6  | -0.072813000 | 1.649142000  | -2.172706000 |
|                                            | 7  | -0.585847000 | 0.920591000  | -1.201322000 |
|                                            | 1  | -5.725771000 | 0.004234000  | -0.979844000 |
|                                            | 1  | -3.693525000 | -2.266319000 | 2.732772000  |
|                                            | 1  | -5.324964000 | -1.367660000 | 1.081691000  |
|                                            | 15 | -0.746359000 | -1.945925000 | 2.894172000  |
|                                            | 1  | -4.827607000 | 1.387882000  | -2.797139000 |
|                                            | 1  | -0.387480000 | 2.811821000  | -3.952620000 |
|                                            | 15 | 1.724389000  | 1.812650000  | -2.110481000 |
|                                            | 8  | 2.245414000  | 0.922078000  | -1.066988000 |
|                                            | 8  | 0.564159000  | -1.426244000 | 2.491222000  |
|                                            | 8  | -0.927067000 | -3.504116000 | 2.946787000  |
|                                            | 6  | -0.275491000 | -4.326565000 | 1.939143000  |
|                                            | 1  | -0.165110000 | -5.296978000 | 2.413035000  |
|                                            | 1  | 0.712140000  | -3.916036000 | 1.740893000  |



|    |              |              |              |
|----|--------------|--------------|--------------|
| 6  | -1.087217000 | -4.418042000 | 0.676273000  |
| 6  | -0.451898000 | -5.371656000 | -0.318157000 |
| 1  | -1.167095000 | -3.429124000 | 0.221096000  |
| 1  | -2.103349000 | -4.738731000 | 0.916989000  |
| 1  | 0.586917000  | -5.080088000 | -0.482447000 |
| 6  | -1.169336000 | -5.392233000 | -1.653998000 |
| 1  | -0.428018000 | -6.380418000 | 0.103922000  |
| 1  | -2.200156000 | -5.725169000 | -1.506388000 |
| 6  | -0.474032000 | -6.278393000 | -2.665468000 |
| 1  | -1.223750000 | -4.373329000 | -2.039633000 |
| 29 | 0.643347000  | -0.142763000 | 0.405877000  |
| 7  | 1.651426000  | 1.373730000  | 2.148549000  |
| 8  | 2.415880000  | 0.487187000  | 1.769373000  |
| 8  | 1.870914000  | 2.141424000  | 3.060650000  |
| 8  | 0.524877000  | 1.465483000  | 1.500015000  |
| 7  | 0.635155000  | -2.288774000 | -1.434055000 |
| 8  | 1.193491000  | -1.797873000 | -0.377208000 |
| 8  | 1.232756000  | -3.175085000 | -2.019972000 |
| 8  | -0.465635000 | -1.859084000 | -1.787896000 |
| 8  | 1.996948000  | 3.354839000  | -1.986264000 |
| 6  | 1.678423000  | 4.005531000  | -0.727041000 |
| 1  | 0.826672000  | 3.508463000  | -0.258447000 |
| 1  | 1.376220000  | 5.012463000  | -1.001887000 |
| 6  | 2.863303000  | 4.011616000  | 0.196051000  |
| 6  | 2.575766000  | 4.805435000  | 1.456026000  |
| 1  | 3.720271000  | 4.433844000  | -0.331169000 |
| 1  | 3.125401000  | 2.982803000  | 0.445056000  |
| 1  | 2.353556000  | 5.844337000  | 1.193365000  |
| 6  | 3.724552000  | 4.766306000  | 2.444023000  |
| 1  | 1.680631000  | 4.408389000  | 1.940092000  |
| 1  | 3.945119000  | 3.725527000  | 2.680503000  |
| 6  | 3.419008000  | 5.523772000  | 3.718275000  |
| 1  | 4.620676000  | 5.174250000  | 1.970868000  |
| 8  | 2.250879000  | 1.596739000  | -3.572103000 |
| 6  | 2.598029000  | 0.255080000  | -4.010598000 |
| 1  | 3.130610000  | -0.245103000 | -3.204923000 |
| 1  | 3.282262000  | 0.409618000  | -4.839180000 |
| 6  | 1.382341000  | -0.523107000 | -4.432849000 |
| 6  | 1.750265000  | -1.895913000 | -4.961327000 |
| 1  | 0.836231000  | 0.043400000  | -5.191034000 |
| 1  | 0.707740000  | -0.640649000 | -3.583040000 |
| 1  | 2.378599000  | -1.793594000 | -5.850955000 |
| 6  | 0.532398000  | -2.739094000 | -5.284329000 |
| 1  | 2.349068000  | -2.418310000 | -4.213472000 |
| 1  | -0.088395000 | -2.806354000 | -4.390499000 |
| 6  | 0.901138000  | -4.130187000 | -5.754157000 |
| 1  | -0.067658000 | -2.233043000 | -6.045222000 |
| 8  | -1.257625000 | -1.576811000 | 4.333641000  |
| 6  | -0.801695000 | -0.336654000 | 4.939516000  |
| 1  | 0.284076000  | -0.309246000 | 4.884872000  |
| 1  | -1.098420000 | -0.422305000 | 5.980131000  |
| 6  | -1.400919000 | 0.875920000  | 4.281002000  |

|                                            |    |              |              |              |
|--------------------------------------------|----|--------------|--------------|--------------|
|                                            | 6  | -0.925902000 | 2.160694000  | 4.932609000  |
|                                            | 1  | -2.491049000 | 0.808918000  | 4.309931000  |
|                                            | 1  | -1.104643000 | 0.897633000  | 3.231443000  |
|                                            | 1  | -1.301032000 | 2.224843000  | 5.957797000  |
|                                            | 6  | -1.344514000 | 3.390521000  | 4.151028000  |
|                                            | 1  | 0.163366000  | 2.145577000  | 4.997306000  |
|                                            | 1  | -0.967446000 | 3.292486000  | 3.131439000  |
|                                            | 6  | -0.829056000 | 4.673946000  | 4.766270000  |
|                                            | 1  | -2.434715000 | 3.421499000  | 4.077278000  |
|                                            | 1  | 3.195534000  | 6.570488000  | 3.514066000  |
|                                            | 1  | 4.252047000  | 5.494574000  | 4.416281000  |
|                                            | 1  | 2.553326000  | 5.096051000  | 4.221492000  |
|                                            | 1  | -1.191580000 | 4.799846000  | 5.785804000  |
|                                            | 1  | -1.136579000 | 5.548037000  | 4.197074000  |
|                                            | 1  | 0.258998000  | 4.671028000  | 4.803732000  |
|                                            | 1  | 1.471040000  | -4.653492000 | -4.988395000 |
|                                            | 1  | 1.512186000  | -4.097240000 | -6.655649000 |
|                                            | 1  | 0.019863000  | -4.728529000 | -5.973337000 |
|                                            | 1  | -0.997878000 | -6.292120000 | -3.618508000 |
|                                            | 1  | -0.403693000 | -7.306542000 | -2.311568000 |
|                                            | 1  | 0.536956000  | -5.920402000 | -2.850528000 |
| Py-PO-C5*Zn(NO <sub>3</sub> ) <sub>2</sub> | 6  | -3.433926000 | -1.533245000 | 2.004265000  |
|                                            | 6  | -4.360452000 | -0.982501000 | 1.155964000  |
|                                            | 6  | -3.931797000 | -0.192620000 | 0.078245000  |
|                                            | 6  | -2.544225000 | -0.001504000 | -0.060836000 |
|                                            | 7  | -1.648579000 | -0.539573000 | 0.768481000  |
|                                            | 6  | -2.074738000 | -1.285775000 | 1.765557000  |
|                                            | 6  | -4.809103000 | 0.406341000  | -0.868316000 |
|                                            | 6  | -2.039881000 | 0.786773000  | -1.142248000 |
|                                            | 6  | -2.933098000 | 1.355241000  | -2.069920000 |
|                                            | 6  | -4.330103000 | 1.145954000  | -1.900276000 |
|                                            | 6  | -2.372894000 | 2.100957000  | -3.118091000 |
|                                            | 1  | -3.019809000 | 2.554552000  | -3.854196000 |
|                                            | 6  | -1.010896000 | 2.243268000  | -3.196853000 |
|                                            | 6  | -0.213970000 | 1.636135000  | -2.215644000 |
|                                            | 7  | -0.716560000 | 0.936548000  | -1.220199000 |
|                                            | 1  | -5.871824000 | 0.255006000  | -0.752511000 |
|                                            | 1  | -3.731025000 | -2.151196000 | 2.836251000  |
|                                            | 1  | -5.416489000 | -1.153951000 | 1.302503000  |
|                                            | 15 | -0.712131000 | -1.958371000 | 2.737802000  |
|                                            | 1  | -5.006931000 | 1.590234000  | -2.614529000 |
|                                            | 1  | -0.550241000 | 2.807951000  | -3.991441000 |
|                                            | 15 | 1.585752000  | 1.726500000  | -2.149744000 |
|                                            | 8  | 2.061756000  | 0.844012000  | -1.069734000 |
|                                            | 8  | 0.557509000  | -1.497132000 | 2.148100000  |
|                                            | 8  | -0.923412000 | -3.509297000 | 2.811087000  |
|                                            | 6  | -0.362710000 | -4.354874000 | 1.768431000  |
|                                            | 1  | -0.356700000 | -5.348783000 | 2.204615000  |
|                                            | 1  | 0.664719000  | -4.043733000 | 1.591383000  |
|                                            | 6  | -1.173440000 | -4.302262000 | 0.503697000  |
|                                            | 6  | -0.630912000 | -5.253715000 | -0.545274000 |
|                                            | 1  | -1.142628000 | -3.289892000 | 0.098460000  |

|    |              |              |              |
|----|--------------|--------------|--------------|
| 1  | -2.217232000 | -4.531873000 | 0.729685000  |
| 1  | 0.444202000  | -5.099782000 | -0.651748000 |
| 6  | -1.279713000 | -5.048192000 | -1.899196000 |
| 1  | -0.768188000 | -6.288266000 | -0.218812000 |
| 1  | -2.359125000 | -5.199213000 | -1.813793000 |
| 6  | -0.707222000 | -5.964421000 | -2.958976000 |
| 1  | -1.132566000 | -4.007416000 | -2.193711000 |
| 30 | 0.843618000  | -0.244272000 | 0.373323000  |
| 7  | 1.588210000  | 1.451793000  | 2.171441000  |
| 8  | 2.429457000  | 0.601809000  | 1.841194000  |
| 8  | 1.743554000  | 2.237909000  | 3.088830000  |
| 8  | 0.495349000  | 1.469912000  | 1.484190000  |
| 7  | 1.518271000  | -2.325569000 | -1.003441000 |
| 8  | 2.345682000  | -1.905758000 | -0.176599000 |
| 8  | 1.729156000  | -3.252143000 | -1.764931000 |
| 8  | 0.384172000  | -1.713214000 | -1.027744000 |
| 8  | 1.935539000  | 3.250549000  | -2.050342000 |
| 6  | 1.611180000  | 3.952090000  | -0.816300000 |
| 1  | 0.740712000  | 3.490509000  | -0.346608000 |
| 1  | 1.340139000  | 4.956002000  | -1.131181000 |
| 6  | 2.781732000  | 3.957868000  | 0.123644000  |
| 6  | 2.488933000  | 4.795266000  | 1.354053000  |
| 1  | 3.656074000  | 4.346182000  | -0.401187000 |
| 1  | 3.015474000  | 2.931640000  | 0.408879000  |
| 1  | 2.283327000  | 5.828045000  | 1.055368000  |
| 6  | 3.623341000  | 4.774147000  | 2.358959000  |
| 1  | 1.583777000  | 4.422819000  | 1.838265000  |
| 1  | 3.829805000  | 3.738918000  | 2.628942000  |
| 6  | 3.302055000  | 5.569282000  | 3.606175000  |
| 1  | 4.529845000  | 5.162183000  | 1.888594000  |
| 8  | 2.141320000  | 1.430134000  | -3.581071000 |
| 6  | 2.566267000  | 0.083499000  | -3.930852000 |
| 1  | 3.141343000  | -0.323549000 | -3.102751000 |
| 1  | 3.226036000  | 0.225988000  | -4.780992000 |
| 6  | 1.401548000  | -0.802157000 | -4.277823000 |
| 6  | 1.876501000  | -2.134405000 | -4.825050000 |
| 1  | 0.773319000  | -0.296274000 | -5.014767000 |
| 1  | 0.789562000  | -0.970323000 | -3.388770000 |
| 1  | 2.439021000  | -1.967595000 | -5.748538000 |
| 6  | 0.740216000  | -3.101169000 | -5.090330000 |
| 1  | 2.567709000  | -2.592068000 | -4.115486000 |
| 1  | 0.228277000  | -3.300525000 | -4.147646000 |
| 6  | 1.221495000  | -4.400132000 | -5.701710000 |
| 1  | 0.007799000  | -2.628291000 | -5.749870000 |
| 8  | -0.979565000 | -1.590098000 | 4.235088000  |
| 6  | -0.497258000 | -0.328887000 | 4.778799000  |
| 1  | 0.555715000  | -0.227612000 | 4.525048000  |
| 1  | -0.587441000 | -0.453933000 | 5.853246000  |
| 6  | -1.289818000 | 0.848641000  | 4.282391000  |
| 6  | -0.873793000 | 2.128713000  | 4.984710000  |
| 1  | -2.355906000 | 0.658958000  | 4.427172000  |
| 1  | -1.120662000 | 0.968461000  | 3.211426000  |

|                                                |    |              |              |              |
|------------------------------------------------|----|--------------|--------------|--------------|
|                                                | 1  | -1.226110000 | 2.117749000  | 6.019705000  |
|                                                | 6  | -1.383735000 | 3.366423000  | 4.273791000  |
|                                                | 1  | 0.214915000  | 2.178819000  | 5.021876000  |
|                                                | 1  | -1.006691000 | 3.347439000  | 3.250080000  |
|                                                | 6  | -0.953405000 | 4.647052000  | 4.956801000  |
|                                                | 1  | -2.474234000 | 3.326190000  | 4.205497000  |
|                                                | 1  | 3.090945000  | 6.611754000  | 3.369022000  |
|                                                | 1  | 4.122584000  | 5.552976000  | 4.319296000  |
|                                                | 1  | 2.424269000  | 5.160793000  | 4.104245000  |
|                                                | 1  | -1.323635000 | 4.694808000  | 5.980219000  |
|                                                | 1  | -1.317312000 | 5.527821000  | 4.432907000  |
|                                                | 1  | 0.132603000  | 4.713471000  | 4.998264000  |
|                                                | 1  | 1.925175000  | -4.901869000 | -5.039673000 |
|                                                | 1  | 1.731175000  | -4.223366000 | -6.648166000 |
|                                                | 1  | 0.400632000  | -5.087388000 | -5.890659000 |
|                                                | 1  | -1.178488000 | -5.807532000 | -3.926647000 |
|                                                | 1  | -0.841371000 | -7.011968000 | -2.691418000 |
|                                                | 1  | 0.360174000  | -5.788396000 | -3.079360000 |
| Pb(NO <sub>3</sub> ) <sub>2</sub> *2Py-PO-cHex | 82 | 0.103313000  | 0.708466000  | 2.246166000  |
|                                                | 15 | 0.703190000  | -1.145152000 | -1.400741000 |
|                                                | 15 | -1.896949000 | 3.622191000  | 1.293261000  |
|                                                | 8  | 0.288812000  | -0.364192000 | -0.167067000 |
|                                                | 8  | 2.282320000  | -1.483198000 | -1.530581000 |
|                                                | 7  | 0.031196000  | -3.406319000 | -2.698818000 |
|                                                | 8  | 0.406870000  | -0.406012000 | -2.819135000 |
|                                                | 7  | -0.916621000 | 2.838434000  | 3.701965000  |
|                                                | 8  | 1.789178000  | 2.767957000  | 2.097380000  |
|                                                | 8  | -1.344296000 | 2.283075000  | 0.820823000  |
|                                                | 8  | 2.914022000  | 0.889983000  | 2.138712000  |
|                                                | 8  | -1.308470000 | 4.928228000  | 0.545052000  |
|                                                | 6  | -0.496734000 | -4.634779000 | -2.829045000 |
|                                                | 6  | -1.970240000 | 5.010405000  | 3.768047000  |
|                                                | 1  | -2.490340000 | 5.816789000  | 3.230052000  |
|                                                | 7  | 2.902437000  | 2.148121000  | 1.972499000  |
|                                                | 6  | -0.069779000 | -2.802150000 | -1.502384000 |
|                                                | 6  | -1.138356000 | -5.315569000 | -1.776282000 |
|                                                | 1  | -1.540989000 | -6.326193000 | -1.939101000 |
|                                                | 6  | -0.655950000 | 2.939313000  | 5.018211000  |
|                                                | 6  | -1.564800000 | 3.846074000  | 3.089037000  |
|                                                | 8  | 3.940562000  | 2.772946000  | 1.697929000  |
|                                                | 6  | -1.032801000 | 4.059705000  | 5.782598000  |
|                                                | 1  | -0.805714000 | 4.103821000  | 6.858060000  |
|                                                | 6  | -0.707672000 | -3.380612000 | -0.387319000 |
|                                                | 1  | -0.777659000 | -2.845389000 | 0.574085000  |
|                                                | 6  | -1.696753000 | 5.113901000  | 5.139178000  |
|                                                | 1  | -1.999564000 | 6.009047000  | 5.702868000  |
|                                                | 6  | 3.309411000  | -0.546235000 | -1.052349000 |
|                                                | 1  | 2.874228000  | 0.034930000  | -0.210930000 |
|                                                | 6  | 4.479283000  | -1.373554000 | -0.526353000 |
|                                                | 1  | 4.839662000  | -2.038742000 | -1.343023000 |
|                                                | 1  | 4.127772000  | -2.027241000 | 0.298849000  |
|                                                | 6  | -1.247653000 | -4.668017000 | -0.537120000 |

|  |    |              |              |              |
|--|----|--------------|--------------|--------------|
|  | 1  | -1.750040000 | -5.159983000 | 0.309750000  |
|  | 6  | 0.118681000  | 4.992368000  | 0.178301000  |
|  | 1  | 0.596578000  | 4.026604000  | 0.448659000  |
|  | 6  | 5.614770000  | -0.450095000 | -0.053954000 |
|  | 1  | 6.467576000  | -1.059759000 | 0.310550000  |
|  | 1  | 5.251278000  | 0.146832000  | 0.811068000  |
|  | 6  | -2.533901000 | 0.023396000  | -5.172453000 |
|  | 1  | -3.321441000 | -0.560253000 | -4.644276000 |
|  | 1  | -2.632712000 | -0.225483000 | -6.249915000 |
|  | 6  | 3.731559000  | 0.401140000  | -2.175917000 |
|  | 1  | 4.063508000  | -0.211578000 | -3.043390000 |
|  | 1  | 2.859450000  | 0.999022000  | -2.512343000 |
|  | 6  | 6.062861000  | 0.503777000  | -1.171145000 |
|  | 1  | 6.857872000  | 1.184598000  | -0.800303000 |
|  | 1  | 6.512938000  | -0.086752000 | -2.001023000 |
|  | 6  | -0.962401000 | -0.040814000 | -3.197798000 |
|  | 1  | -1.675787000 | -0.628790000 | -2.574852000 |
|  | 6  | 0.790762000  | 6.114368000  | 0.966216000  |
|  | 1  | 0.714783000  | 5.903710000  | 2.053325000  |
|  | 1  | 0.241598000  | 7.062621000  | 0.773418000  |
|  | 6  | -1.151699000 | -0.418308000 | -4.665691000 |
|  | 1  | -0.353306000 | 0.085458000  | -5.254581000 |
|  | 1  | -1.009552000 | -1.511786000 | -4.786244000 |
|  | 6  | -2.769789000 | 1.522484000  | -4.934934000 |
|  | 1  | -2.055525000 | 2.108141000  | -5.556623000 |
|  | 1  | -3.788734000 | 1.809576000  | -5.269882000 |
|  | 6  | 0.216847000  | 5.200738000  | -1.330591000 |
|  | 1  | -0.352608000 | 6.118301000  | -1.598329000 |
|  | 1  | -0.263533000 | 4.348488000  | -1.855112000 |
|  | 6  | -1.188506000 | 1.449748000  | -2.945957000 |
|  | 1  | -0.391590000 | 2.014730000  | -3.478788000 |
|  | 1  | -1.080978000 | 1.666721000  | -1.863554000 |
|  | 6  | 4.876824000  | 1.316520000  | -1.711193000 |
|  | 1  | 5.195459000  | 1.969845000  | -2.550131000 |
|  | 1  | 4.505230000  | 1.991894000  | -0.908028000 |
|  | 6  | 2.391707000  | 6.467345000  | -0.974176000 |
|  | 1  | 3.461700000  | 6.523713000  | -1.265229000 |
|  | 1  | 1.937356000  | 7.446761000  | -1.246281000 |
|  | 6  | -2.570654000 | 1.888051000  | -3.457119000 |
|  | 1  | -3.360490000 | 1.393378000  | -2.847739000 |
|  | 1  | -2.695553000 | 2.979864000  | -3.299690000 |
|  | 6  | 1.687186000  | 5.349420000  | -1.756626000 |
|  | 1  | 1.742123000  | 5.539166000  | -2.848783000 |
|  | 1  | 2.218338000  | 4.386918000  | -1.578593000 |
|  | 6  | 2.262714000  | 6.255026000  | 0.541111000  |
|  | 1  | 2.733003000  | 7.093341000  | 1.096074000  |
|  | 1  | 2.810818000  | 5.332947000  | 0.836720000  |
|  | 15 | -0.354919000 | -5.420845000 | -4.479921000 |
|  | 8  | -0.660670000 | -6.898508000 | -4.470631000 |
|  | 8  | -1.330176000 | -4.472902000 | -5.375541000 |
|  | 8  | 1.110938000  | -4.989749000 | -5.059962000 |
|  | 6  | -1.850395000 | -4.943494000 | -6.661114000 |

|    |              |              |               |
|----|--------------|--------------|---------------|
| 1  | -1.757630000 | -6.052390000 | -6.681823000  |
| 6  | -3.326271000 | -4.558016000 | -6.736786000  |
| 1  | -3.405728000 | -3.457777000 | -6.588464000  |
| 1  | -3.878143000 | -5.041724000 | -5.904311000  |
| 6  | -3.923781000 | -4.947680000 | -8.098436000  |
| 1  | -4.985138000 | -4.626652000 | -8.147392000  |
| 1  | -3.927074000 | -6.057035000 | -8.191446000  |
| 6  | 4.650958000  | -4.951676000 | -3.705286000  |
| 1  | 4.487995000  | -5.343294000 | -2.675839000  |
| 1  | 5.377341000  | -4.117510000 | -3.609426000  |
| 6  | -1.037726000 | -4.336950000 | -7.806186000  |
| 1  | -1.051076000 | -3.230025000 | -7.692776000  |
| 1  | 0.020016000  | -4.661679000 | -7.725482000  |
| 6  | -3.119530000 | -4.345964000 | -9.260098000  |
| 1  | -3.542944000 | -4.674850000 | -10.232419000 |
| 1  | -3.212633000 | -3.236751000 | -9.233619000  |
| 6  | 2.316544000  | -5.553759000 | -4.453211000  |
| 1  | 2.053668000  | -5.981133000 | -3.457298000  |
| 6  | 3.320525000  | -4.418780000 | -4.259907000  |
| 1  | 3.487387000  | -3.936561000 | -5.248842000  |
| 1  | 2.884282000  | -3.649038000 | -3.590687000  |
| 6  | 5.220791000  | -6.071314000 | -4.588995000  |
| 1  | 5.492702000  | -5.648811000 | -5.582594000  |
| 1  | 6.158419000  | -6.471196000 | -4.148811000  |
| 6  | 2.868301000  | -6.670884000 | -5.339135000  |
| 1  | 3.020723000  | -6.257167000 | -6.360689000  |
| 1  | 2.113162000  | -7.479975000 | -5.419936000  |
| 6  | -1.635767000 | -4.729928000 | -9.166994000  |
| 1  | -1.054066000 | -4.253538000 | -9.983491000  |
| 1  | -1.532036000 | -5.829307000 | -9.308397000  |
| 6  | 4.199798000  | -7.202267000 | -4.784413000  |
| 1  | 4.016139000  | -7.703306000 | -3.807230000  |
| 1  | 4.603923000  | -7.982466000 | -5.462732000  |
| 15 | 0.228379000  | 1.522143000  | 5.786596000   |
| 8  | 0.624690000  | 0.489016000  | 4.741148000   |
| 8  | 1.429807000  | 2.139167000  | 6.667022000   |
| 8  | -0.712925000 | 1.002300000  | 6.992181000   |
| 6  | 2.807629000  | 2.217720000  | 6.149235000   |
| 1  | 2.920800000  | 1.430947000  | 5.371850000   |
| 6  | 3.062323000  | 3.591435000  | 5.529077000   |
| 1  | 2.805206000  | 4.369374000  | 6.281384000   |
| 1  | 2.396016000  | 3.736897000  | 4.653035000   |
| 6  | 4.535389000  | 3.729118000  | 5.105221000   |
| 1  | 4.709510000  | 4.748015000  | 4.700982000   |
| 1  | 4.739110000  | 3.026339000  | 4.267516000   |
| 6  | -4.391587000 | 0.088729000  | 7.260467000   |
| 1  | -4.719131000 | 0.236749000  | 6.206312000   |
| 1  | -5.195876000 | 0.507647000  | 7.900130000   |
| 6  | 3.742220000  | 1.923425000  | 7.319158000   |
| 1  | 3.521291000  | 2.648280000  | 8.133494000   |
| 1  | 3.531602000  | 0.908392000  | 7.714551000   |
| 6  | 5.491462000  | 3.434706000  | 6.269285000   |

|                                                |    |              |              |              |
|------------------------------------------------|----|--------------|--------------|--------------|
|                                                | 1  | 6.545180000  | 3.493679000  | 5.924400000  |
|                                                | 1  | 5.371400000  | 4.217398000  | 7.052109000  |
|                                                | 6  | -1.954856000 | 0.276636000  | 6.660380000  |
|                                                | 1  | -2.178212000 | 0.421789000  | 5.578953000  |
|                                                | 6  | -3.086410000 | 0.867205000  | 7.495974000  |
|                                                | 1  | -2.795663000 | 0.808363000  | 8.568149000  |
|                                                | 1  | -3.212724000 | 1.941773000  | 7.248304000  |
|                                                | 6  | -4.207461000 | -1.411807000 | 7.529758000  |
|                                                | 1  | -3.991374000 | -1.563865000 | 8.611365000  |
|                                                | 1  | -5.149625000 | -1.959010000 | 7.316360000  |
|                                                | 6  | -1.747710000 | -1.213535000 | 6.924475000  |
|                                                | 1  | -1.407956000 | -1.336405000 | 7.976558000  |
|                                                | 1  | -0.938568000 | -1.593903000 | 6.267290000  |
|                                                | 6  | 5.210755000  | 2.056662000  | 6.885082000  |
|                                                | 1  | 5.874278000  | 1.871471000  | 7.755161000  |
|                                                | 1  | 5.444710000  | 1.265757000  | 6.137593000  |
|                                                | 6  | -3.055137000 | -1.991289000 | 6.696751000  |
|                                                | 1  | -3.321325000 | -1.953003000 | 5.616917000  |
|                                                | 1  | -2.895840000 | -3.062423000 | 6.940116000  |
|                                                | 8  | -2.289945000 | -0.101171000 | 2.972061000  |
|                                                | 8  | -0.976831000 | -1.816771000 | 2.615740000  |
|                                                | 7  | -2.141065000 | -1.371017000 | 2.860949000  |
|                                                | 8  | -3.108918000 | -2.132040000 | 2.987491000  |
|                                                | 8  | -3.457982000 | 3.932503000  | 1.044885000  |
|                                                | 6  | -4.595015000 | 3.028852000  | 1.292005000  |
|                                                | 1  | -5.460422000 | 3.682535000  | 1.052712000  |
|                                                | 6  | -4.693138000 | 2.591077000  | 2.753277000  |
|                                                | 1  | -4.711780000 | 3.481622000  | 3.415159000  |
|                                                | 1  | -3.796047000 | 1.989479000  | 3.016976000  |
|                                                | 6  | -4.587035000 | 1.837019000  | 0.333674000  |
|                                                | 1  | -3.675096000 | 1.233349000  | 0.523107000  |
|                                                | 1  | -4.530953000 | 2.201139000  | -0.713198000 |
|                                                | 6  | -5.967568000 | 0.520143000  | 2.013780000  |
|                                                | 1  | -6.901483000 | -0.063672000 | 2.154706000  |
|                                                | 1  | -5.125287000 | -0.159749000 | 2.269463000  |
|                                                | 6  | -5.838564000 | 0.969518000  | 0.550725000  |
|                                                | 1  | -5.801570000 | 0.091961000  | -0.127758000 |
|                                                | 1  | -6.743280000 | 1.550843000  | 0.262210000  |
|                                                | 6  | -5.947698000 | 1.724641000  | 2.966405000  |
|                                                | 1  | -5.987109000 | 1.389492000  | 4.024304000  |
|                                                | 1  | -6.856132000 | 2.345812000  | 2.798831000  |
| Cd(NO <sub>3</sub> ) <sub>2</sub> *2Py-PO-cHex | 48 | -0.215852000 | 1.194067000  | 1.895097000  |
|                                                | 15 | 0.643085000  | -0.928194000 | -1.232753000 |
|                                                | 15 | -2.365971000 | 3.714534000  | 1.003142000  |
|                                                | 8  | 0.347161000  | -0.053958000 | -0.027209000 |
|                                                | 8  | 2.148520000  | -1.515016000 | -1.319438000 |
|                                                | 7  | -0.260456000 | -3.147246000 | -2.455837000 |
|                                                | 8  | 0.496855000  | -0.186545000 | -2.671655000 |
|                                                | 7  | -1.180110000 | 2.985941000  | 3.318393000  |
|                                                | 8  | 1.363803000  | 2.746516000  | 1.302886000  |
|                                                | 8  | -1.695365000 | 2.447066000  | 0.483759000  |
|                                                | 8  | 2.792675000  | 1.187077000  | 1.886096000  |

|  |   |              |              |              |
|--|---|--------------|--------------|--------------|
|  | 8 | -1.904258000 | 5.110195000  | 0.333617000  |
|  | 6 | -0.965096000 | -4.285893000 | -2.566441000 |
|  | 6 | -2.674541000 | 4.856035000  | 3.602628000  |
|  | 1 | -3.381607000 | 5.569284000  | 3.154025000  |
|  | 7 | 2.586625000  | 2.347824000  | 1.463133000  |
|  | 6 | -0.378989000 | -2.445845000 | -1.314964000 |
|  | 6 | -1.810353000 | -4.775279000 | -1.551292000 |
|  | 1 | -2.354089000 | -5.720288000 | -1.697137000 |
|  | 6 | -0.888246000 | 3.025586000  | 4.631413000  |
|  | 6 | -2.053040000 | 3.874067000  | 2.809655000  |
|  | 8 | 3.507520000  | 3.137197000  | 1.192799000  |
|  | 6 | -1.468711000 | 3.963162000  | 5.503050000  |
|  | 1 | -1.215041000 | 3.964010000  | 6.573253000  |
|  | 6 | -1.205359000 | -2.831298000 | -0.241786000 |
|  | 1 | -1.282264000 | -2.212112000 | 0.667883000  |
|  | 6 | -2.375591000 | 4.893729000  | 4.972333000  |
|  | 1 | -2.848572000 | 5.643296000  | 5.624422000  |
|  | 6 | 3.305199000  | -0.754018000 | -0.822764000 |
|  | 1 | 2.962616000  | -0.148802000 | 0.043454000  |
|  | 6 | 4.346689000  | -1.762767000 | -0.347462000 |
|  | 1 | 4.611004000  | -2.431287000 | -1.197549000 |
|  | 1 | 3.909002000  | -2.400066000 | 0.448692000  |
|  | 6 | -1.933031000 | -4.025119000 | -0.373066000 |
|  | 1 | -2.590073000 | -4.362738000 | 0.443136000  |
|  | 6 | -0.489876000 | 5.525436000  | 0.389594000  |
|  | 1 | 0.048208000  | 4.879028000  | 1.117965000  |
|  | 6 | 5.602999000  | -1.033031000 | 0.156735000  |
|  | 1 | 6.364511000  | -1.774798000 | 0.475631000  |
|  | 1 | 5.339538000  | -0.440683000 | 1.061303000  |
|  | 6 | -2.333849000 | 0.388124000  | -5.131105000 |
|  | 1 | -3.202688000 | 0.010536000  | -4.545971000 |
|  | 1 | -2.473556000 | 0.019932000  | -6.169190000 |
|  | 6 | 3.851812000  | 0.170790000  | -1.911027000 |
|  | 1 | 4.091750000  | -0.441447000 | -2.808627000 |
|  | 1 | 3.070668000  | 0.899517000  | -2.210987000 |
|  | 6 | 6.174727000  | -0.092402000 | -0.914247000 |
|  | 1 | 7.054137000  | 0.455310000  | -0.514690000 |
|  | 1 | 6.542868000  | -0.697512000 | -1.773491000 |
|  | 6 | -0.797442000 | 0.330507000  | -3.131678000 |
|  | 1 | -1.598246000 | -0.051803000 | -2.457129000 |
|  | 6 | -0.443818000 | 6.975235000  | 0.864098000  |
|  | 1 | -0.894126000 | 7.052206000  | 1.875743000  |
|  | 1 | -1.069622000 | 7.587017000  | 0.177319000  |
|  | 6 | -1.038014000 | -0.195081000 | -4.545752000 |
|  | 1 | -0.170112000 | 0.102870000  | -5.175159000 |
|  | 1 | -1.065687000 | -1.303760000 | -4.531543000 |
|  | 6 | -2.327510000 | 1.923399000  | -5.093082000 |
|  | 1 | -1.529465000 | 2.302463000  | -5.770593000 |
|  | 1 | -3.287707000 | 2.322449000  | -5.482511000 |
|  | 6 | 0.144966000  | 5.344563000  | -0.987402000 |
|  | 1 | -0.463828000 | 5.906302000  | -1.730208000 |
|  | 1 | 0.111768000  | 4.273886000  | -1.274124000 |



|    |              |              |               |
|----|--------------|--------------|---------------|
| 6  | -0.782387000 | 1.856955000  | -3.073938000  |
| 1  | 0.100139000  | 2.215192000  | -3.648799000  |
| 1  | -0.653189000 | 2.184160000  | -2.022355000  |
| 6  | 5.111917000  | 0.898338000  | -1.411407000  |
| 1  | 5.520033000  | 1.537050000  | -2.222321000  |
| 1  | 4.828323000  | 1.584096000  | -0.582068000  |
| 6  | 1.665343000  | 7.322858000  | -0.510996000  |
| 1  | 2.721585000  | 7.663011000  | -0.472813000  |
| 1  | 1.149594000  | 7.975869000  | -1.250808000  |
| 6  | -2.072252000 | 2.443082000  | -3.670794000  |
| 1  | -2.932513000 | 2.170443000  | -3.018969000  |
| 1  | -2.015189000 | 3.551755000  | -3.660548000  |
| 6  | 1.592541000  | 5.864451000  | -0.985071000  |
| 1  | 2.026691000  | 5.760355000  | -2.001254000  |
| 1  | 2.205210000  | 5.222762000  | -0.313750000  |
| 6  | 1.003080000  | 7.496150000  | 0.863455000   |
| 1  | 1.015565000  | 8.561344000  | 1.174784000   |
| 1  | 1.591546000  | 6.939243000  | 1.626921000   |
| 15 | -0.781429000 | -5.220455000 | -4.132679000  |
| 8  | -1.353720000 | -6.615483000 | -4.069864000  |
| 8  | -1.450746000 | -4.193833000 | -5.203808000  |
| 8  | 0.797033000  | -5.113108000 | -4.545536000  |
| 6  | -1.742374000 | -4.642101000 | -6.568411000  |
| 1  | -1.663578000 | -5.752227000 | -6.592774000  |
| 6  | -3.176143000 | -4.236295000 | -6.904644000  |
| 1  | -3.269045000 | -3.136855000 | -6.758696000  |
| 1  | -3.874500000 | -4.722033000 | -6.191973000  |
| 6  | -3.521701000 | -4.602633000 | -8.356922000  |
| 1  | -4.553116000 | -4.267112000 | -8.592422000  |
| 1  | -3.519959000 | -5.710705000 | -8.464117000  |
| 6  | 4.113258000  | -5.637920000 | -2.789962000  |
| 1  | 3.770018000  | -5.898581000 | -1.763396000  |
| 1  | 4.978455000  | -4.953581000 | -2.664083000  |
| 6  | -0.729089000 | -4.033192000 | -7.538193000  |
| 1  | -0.749814000 | -2.927671000 | -7.413028000  |
| 1  | 0.291789000  | -4.374836000 | -7.271165000  |
| 6  | -2.513970000 | -3.997642000 | -9.345155000  |
| 1  | -2.757037000 | -4.309819000 | -10.382578000 |
| 1  | -2.598914000 | -2.887723000 | -9.320269000  |
| 6  | 1.795700000  | -5.845523000 | -3.767445000  |
| 1  | 1.352270000  | -6.124755000 | -2.783078000  |
| 6  | 2.981170000  | -4.911174000 | -3.532297000  |
| 1  | 3.342529000  | -4.559067000 | -4.524170000  |
| 1  | 2.639447000  | -4.016065000 | -2.972977000  |
| 6  | 4.535279000  | -6.919201000 | -3.524519000  |
| 1  | 4.987905000  | -6.645570000 | -4.504279000  |
| 1  | 5.323065000  | -7.451253000 | -2.950802000  |
| 6  | 2.199617000  | -7.121322000 | -4.506262000  |
| 1  | 2.532897000  | -6.837244000 | -5.529074000  |
| 1  | 1.309486000  | -7.774085000 | -4.618531000  |
| 6  | -1.075609000 | -4.401332000 | -8.990222000  |
| 1  | -0.350913000 | -3.922366000 | -9.681174000  |

|    |              |              |              |
|----|--------------|--------------|--------------|
| 1  | -0.959048000 | -5.500038000 | -9.126585000 |
| 6  | 3.334591000  | -7.846731000 | -3.765580000 |
| 1  | 2.955224000  | -8.217154000 | -2.786589000 |
| 1  | 3.642760000  | -8.745465000 | -4.339554000 |
| 15 | 0.363511000  | 1.794759000  | 5.166955000  |
| 8  | 0.597372000  | 0.746022000  | 4.086643000  |
| 8  | 1.629626000  | 2.717369000  | 5.548761000  |
| 8  | -0.085562000 | 1.234786000  | 6.615157000  |
| 6  | 3.006908000  | 2.335737000  | 5.187379000  |
| 1  | 2.948426000  | 1.676568000  | 4.294944000  |
| 6  | 3.753132000  | 3.616277000  | 4.825442000  |
| 1  | 3.699620000  | 4.314249000  | 5.690125000  |
| 1  | 3.250126000  | 4.107968000  | 3.967276000  |
| 6  | 5.219696000  | 3.301011000  | 4.488005000  |
| 1  | 5.761158000  | 4.244052000  | 4.265588000  |
| 1  | 5.247747000  | 2.697752000  | 3.553334000  |
| 6  | -3.172737000 | -0.347184000 | 8.159123000  |
| 1  | -3.887112000 | -0.256774000 | 7.310284000  |
| 1  | -3.740432000 | -0.085700000 | 9.076238000  |
| 6  | 3.664936000  | 1.584417000  | 6.342281000  |
| 1  | 3.612779000  | 2.219605000  | 7.254102000  |
| 1  | 3.098242000  | 0.654148000  | 6.557499000  |
| 6  | 5.910213000  | 2.534231000  | 5.625084000  |
| 1  | 6.950355000  | 2.273996000  | 5.336748000  |
| 1  | 5.986161000  | 3.194378000  | 6.518473000  |
| 6  | -1.205951000 | 0.277539000  | 6.726504000  |
| 1  | -1.839535000 | 0.368798000  | 5.816902000  |
| 6  | -2.023876000 | 0.655653000  | 7.956767000  |
| 1  | -1.351924000 | 0.652222000  | 8.843543000  |
| 1  | -2.415227000 | 1.688185000  | 7.843682000  |
| 6  | -2.657611000 | -1.792310000 | 8.232043000  |
| 1  | -2.038561000 | -1.914122000 | 9.149385000  |
| 1  | -3.509248000 | -2.497886000 | 8.330432000  |
| 6  | -0.658427000 | -1.146053000 | 6.808530000  |
| 1  | 0.047368000  | -1.203249000 | 7.666858000  |
| 1  | -0.081309000 | -1.374475000 | 5.889108000  |
| 6  | 5.130529000  | 1.265795000  | 6.000714000  |
| 1  | 5.610206000  | 0.747755000  | 6.857022000  |
| 1  | 5.157497000  | 0.552452000  | 5.146660000  |
| 6  | -1.809609000 | -2.147230000 | 7.001920000  |
| 1  | -2.450567000 | -2.142421000 | 6.091640000  |
| 1  | -1.400242000 | -3.174965000 | 7.091185000  |
| 8  | -1.447946000 | -0.699609000 | 2.135708000  |
| 8  | -2.969027000 | -1.838633000 | 3.199727000  |
| 7  | -2.365907000 | -0.765175000 | 3.055785000  |
| 8  | -2.607029000 | 0.249910000  | 3.742471000  |
| 8  | -3.947056000 | 3.884870000  | 0.749035000  |
| 6  | -4.939892000 | 2.795616000  | 0.789173000  |
| 1  | -5.899804000 | 3.353100000  | 0.760759000  |
| 6  | -4.855848000 | 1.996764000  | 2.087697000  |
| 1  | -4.991284000 | 2.674526000  | 2.956284000  |
| 1  | -3.841944000 | 1.550850000  | 2.178480000  |

|                                                |    |              |              |              |
|------------------------------------------------|----|--------------|--------------|--------------|
|                                                | 6  | -4.834695000 | 1.910801000  | -0.453796000 |
|                                                | 1  | -3.821077000 | 1.458235000  | -0.483191000 |
|                                                | 1  | -4.943371000 | 2.536389000  | -1.363954000 |
|                                                | 6  | -5.793601000 | -0.030037000 | 0.872072000  |
|                                                | 1  | -6.585288000 | -0.808062000 | 0.893719000  |
|                                                | 1  | -4.819680000 | -0.569349000 | 0.888329000  |
|                                                | 6  | -5.897405000 | 0.800276000  | -0.415200000 |
|                                                | 1  | -5.790749000 | 0.154437000  | -1.311391000 |
|                                                | 1  | -6.910901000 | 1.257033000  | -0.476122000 |
|                                                | 6  | -5.895045000 | 0.863166000  | 2.116666000  |
|                                                | 1  | -5.747263000 | 0.264984000  | 3.039579000  |
|                                                | 1  | -6.917229000 | 1.299413000  | 2.175965000  |
| Zn(NO <sub>3</sub> ) <sub>2</sub> *2Py-PO-cHex | 30 | -0.465368000 | 1.428207000  | 1.538562000  |
|                                                | 15 | 0.615367000  | -0.733640000 | -1.125665000 |
|                                                | 15 | -2.433612000 | 3.867319000  | 0.810519000  |
|                                                | 8  | 0.269042000  | 0.156679000  | 0.055478000  |
|                                                | 8  | 2.130526000  | -1.290150000 | -1.143311000 |
|                                                | 7  | -0.181375000 | -3.026182000 | -2.288610000 |
|                                                | 8  | 0.500229000  | -0.016600000 | -2.577946000 |
|                                                | 7  | -1.165598000 | 2.980423000  | 2.988350000  |
|                                                | 8  | 0.976335000  | 2.876731000  | 0.993321000  |
|                                                | 8  | -1.768936000 | 2.615509000  | 0.244874000  |
|                                                | 8  | 2.755982000  | 1.785228000  | 1.679275000  |
|                                                | 8  | -2.017937000 | 5.279601000  | 0.149756000  |
|                                                | 6  | -0.877073000 | -4.171416000 | -2.385028000 |
|                                                | 6  | -2.484597000 | 4.928909000  | 3.489285000  |
|                                                | 1  | -3.173325000 | 5.713365000  | 3.142646000  |
|                                                | 7  | 2.247735000  | 2.833072000  | 1.236725000  |
|                                                | 6  | -0.388299000 | -2.261152000 | -1.202199000 |
|                                                | 6  | -1.792839000 | -4.607025000 | -1.406328000 |
|                                                | 1  | -2.321321000 | -5.562973000 | -1.536216000 |
|                                                | 6  | -0.751100000 | 2.930726000  | 4.266369000  |
|                                                | 6  | -2.010047000 | 3.950551000  | 2.597676000  |
|                                                | 8  | 2.922886000  | 3.857561000  | 1.013211000  |
|                                                | 6  | -1.176651000 | 3.859388000  | 5.228919000  |
|                                                | 1  | -0.823849000 | 3.790229000  | 6.268438000  |
|                                                | 6  | -1.301749000 | -2.580288000 | -0.180070000 |
|                                                | 1  | -1.470847000 | -1.886647000 | 0.659646000  |
|                                                | 6  | -2.060588000 | 4.873911000  | 4.825842000  |
|                                                | 1  | -2.415890000 | 5.620177000  | 5.552174000  |
|                                                | 6  | 3.252898000  | -0.490579000 | -0.620465000 |
|                                                | 1  | 2.870909000  | 0.100947000  | 0.238084000  |
|                                                | 6  | 4.318469000  | -1.470363000 | -0.138514000 |
|                                                | 1  | 4.606475000  | -2.129033000 | -0.988558000 |
|                                                | 1  | 3.892710000  | -2.122636000 | 0.652010000  |
|                                                | 6  | -2.013042000 | -3.785741000 | -0.291925000 |
|                                                | 1  | -2.736353000 | -4.073361000 | 0.486447000  |
|                                                | 6  | -0.598220000 | 5.676778000  | 0.069875000  |
|                                                | 1  | 0.019034000  | 4.897838000  | 0.568157000  |
|                                                | 6  | 5.553764000  | -0.712732000 | 0.377167000  |
|                                                | 1  | 6.333446000  | -1.439297000 | 0.687099000  |
|                                                | 1  | 5.277411000  | -0.139373000 | 1.290429000  |

|    |              |              |              |
|----|--------------|--------------|--------------|
| 6  | -2.389181000 | 0.476098000  | -4.992527000 |
| 1  | -3.244157000 | 0.139292000  | -4.363899000 |
| 1  | -2.565673000 | 0.059196000  | -6.006321000 |
| 6  | 3.783573000  | 0.461017000  | -1.693323000 |
| 1  | 4.051760000  | -0.133623000 | -2.594778000 |
| 1  | 2.984604000  | 1.170120000  | -1.993447000 |
| 6  | 6.103846000  | 0.255443000  | -0.680410000 |
| 1  | 6.965771000  | 0.822645000  | -0.270161000 |
| 1  | 6.492339000  | -0.330031000 | -1.544224000 |
| 6  | -0.791980000 | 0.503482000  | -3.044881000 |
| 1  | -1.584239000 | 0.190323000  | -2.326108000 |
| 6  | -0.428539000 | 7.014312000  | 0.786238000  |
| 1  | -0.718147000 | 6.909994000  | 1.852763000  |
| 1  | -1.124138000 | 7.751061000  | 0.326633000  |
| 6  | -1.083769000 | -0.097690000 | -4.417955000 |
| 1  | -0.231634000 | 0.151737000  | -5.088433000 |
| 1  | -1.127555000 | -1.203639000 | -4.343948000 |
| 6  | -2.362407000 | 2.011590000  | -5.032791000 |
| 1  | -1.587527000 | 2.343706000  | -5.759948000 |
| 1  | -3.332484000 | 2.403256000  | -5.404831000 |
| 6  | -0.192864000 | 5.756736000  | -1.400059000 |
| 1  | -0.883673000 | 6.456751000  | -1.920527000 |
| 1  | -0.312610000 | 4.761114000  | -1.874170000 |
| 6  | -0.735489000 | 2.028365000  | -3.081332000 |
| 1  | 0.124772000  | 2.330563000  | -3.718911000 |
| 1  | -0.547381000 | 2.410846000  | -2.058088000 |
| 6  | 5.016324000  | 1.220891000  | -1.173498000 |
| 1  | 5.411728000  | 1.880449000  | -1.973959000 |
| 1  | 4.705080000  | 1.888293000  | -0.339365000 |
| 6  | 1.460158000  | 7.593474000  | -0.810970000 |
| 1  | 2.522472000  | 7.909636000  | -0.877539000 |
| 1  | 0.862991000  | 8.378583000  | -1.327478000 |
| 6  | -2.042354000 | 2.602078000  | -3.651574000 |
| 1  | -2.875726000 | 2.373725000  | -2.948921000 |
| 1  | -1.973444000 | 3.708886000  | -3.702151000 |
| 6  | 1.258858000  | 6.249404000  | -1.525549000 |
| 1  | 1.537110000  | 6.326575000  | -2.597191000 |
| 1  | 1.934909000  | 5.490683000  | -1.072868000 |
| 6  | 1.022494000  | 7.508891000  | 0.658580000  |
| 1  | 1.127366000  | 8.493793000  | 1.159291000  |
| 1  | 1.694894000  | 6.805600000  | 1.198734000  |
| 15 | -0.614581000 | -5.176726000 | -3.895368000 |
| 8  | -1.151304000 | -6.582640000 | -3.780649000 |
| 8  | -1.284733000 | -4.225498000 | -5.035348000 |
| 8  | 0.969825000  | -5.036937000 | -4.269040000 |
| 6  | -1.679407000 | -4.791000000 | -6.327912000 |
| 1  | -1.786281000 | -5.891454000 | -6.198732000 |
| 6  | -3.033052000 | -4.194359000 | -6.707971000 |
| 1  | -2.936789000 | -3.085467000 | -6.714862000 |
| 1  | -3.782479000 | -4.453370000 | -5.931592000 |
| 6  | -3.477258000 | -4.689648000 | -8.093685000 |
| 1  | -4.444373000 | -4.218729000 | -8.367155000 |

|    |              |              |               |
|----|--------------|--------------|---------------|
| 1  | -3.664270000 | -5.786044000 | -8.046337000  |
| 6  | 4.258829000  | -5.423896000 | -2.428751000  |
| 1  | 3.899997000  | -5.663569000 | -1.402390000  |
| 1  | 5.104233000  | -4.714858000 | -2.305500000  |
| 6  | -0.606265000 | -4.499219000 | -7.377971000  |
| 1  | -0.435738000 | -3.400119000 | -7.404565000  |
| 1  | 0.350581000  | -4.971823000 | -7.075174000  |
| 6  | -2.412024000 | -4.404741000 | -9.162511000  |
| 1  | -2.734483000 | -4.809747000 | -10.144767000 |
| 1  | -2.309767000 | -3.303670000 | -9.292726000  |
| 6  | 1.968283000  | -5.718183000 | -3.445362000  |
| 1  | 1.510237000  | -5.978521000 | -2.462588000  |
| 6  | 3.125087000  | -4.747520000 | -3.214965000  |
| 1  | 3.498205000  | -4.416291000 | -4.209598000  |
| 1  | 2.750512000  | -3.845392000 | -2.689124000  |
| 6  | 4.727660000  | -6.715519000 | -3.115492000  |
| 1  | 5.192555000  | -6.460273000 | -4.094454000  |
| 1  | 5.516917000  | -7.209112000 | -2.510311000  |
| 6  | 2.419411000  | -7.005492000 | -4.136058000  |
| 1  | 2.768696000  | -6.743237000 | -5.159393000  |
| 1  | 1.547890000  | -7.682941000 | -4.247976000  |
| 6  | -1.051573000 | -4.994530000 | -8.763567000  |
| 1  | -0.277448000 | -4.742234000 | -9.517932000  |
| 1  | -1.123902000 | -6.105392000 | -8.748945000  |
| 6  | 3.555511000  | -7.680165000 | -3.350700000  |
| 1  | 3.165262000  | -8.029356000 | -2.368216000  |
| 1  | 3.896635000  | -8.587999000 | -3.890604000  |
| 15 | 0.423200000  | 1.557515000  | 4.564235000   |
| 8  | 0.425700000  | 0.644941000  | 3.338142000   |
| 8  | 1.770831000  | 2.365427000  | 4.906820000   |
| 8  | 0.076635000  | 0.831724000  | 5.964874000   |
| 6  | 3.113591000  | 1.750999000  | 4.913711000   |
| 1  | 3.126842000  | 0.973641000  | 4.120610000   |
| 6  | 4.103434000  | 2.856144000  | 4.555097000   |
| 1  | 3.972621000  | 3.689113000  | 5.280947000   |
| 1  | 3.870005000  | 3.247082000  | 3.544572000   |
| 6  | 5.547099000  | 2.331144000  | 4.612983000   |
| 1  | 6.251720000  | 3.158836000  | 4.388936000   |
| 1  | 5.690687000  | 1.572912000  | 3.809854000   |
| 6  | -2.710412000 | -1.070433000 | 7.693163000   |
| 1  | -3.548323000 | -0.867569000 | 6.989189000   |
| 1  | -3.128849000 | -0.972194000 | 8.716370000   |
| 6  | 3.409905000  | 1.126253000  | 6.277039000   |
| 1  | 3.263481000  | 1.904528000  | 7.058333000   |
| 1  | 2.686201000  | 0.312738000  | 6.486014000   |
| 6  | 5.867072000  | 1.697522000  | 5.973871000   |
| 1  | 6.898301000  | 1.285994000  | 5.975482000   |
| 1  | 5.839011000  | 2.485221000  | 6.760151000   |
| 6  | -0.997646000 | -0.173612000 | 6.091965000   |
| 1  | -1.769333000 | 0.045776000  | 5.323317000   |
| 6  | -1.610253000 | -0.016593000 | 7.479731000   |
| 1  | -0.807991000 | -0.140877000 | 8.240601000   |

|                                                |    |              |              |              |
|------------------------------------------------|----|--------------|--------------|--------------|
|                                                | 1  | -2.016976000 | 1.009825000  | 7.593971000  |
|                                                | 6  | -2.185290000 | -2.494083000 | 7.454841000  |
|                                                | 1  | -1.432596000 | -2.742127000 | 8.236861000  |
|                                                | 1  | -3.009456000 | -3.229738000 | 7.566086000  |
|                                                | 6  | -0.433378000 | -1.574320000 | 5.863547000  |
|                                                | 1  | 0.397630000  | -1.743401000 | 6.584098000  |
|                                                | 1  | -0.007474000 | -1.639852000 | 4.841607000  |
|                                                | 6  | 4.853872000  | 0.599275000  | 6.325033000  |
|                                                | 1  | 5.061922000  | 0.177667000  | 7.330415000  |
|                                                | 1  | 4.960008000  | -0.242638000 | 5.604408000  |
|                                                | 6  | -1.535424000 | -2.626888000 | 6.069762000  |
|                                                | 1  | -2.309167000 | -2.496225000 | 5.280142000  |
|                                                | 1  | -1.112919000 | -3.643683000 | 5.930320000  |
|                                                | 8  | -1.950229000 | -0.054239000 | 1.654201000  |
|                                                | 8  | -3.259407000 | -1.400181000 | 2.752741000  |
|                                                | 7  | -2.701883000 | -0.290613000 | 2.682515000  |
|                                                | 8  | -2.850833000 | 0.593550000  | 3.551312000  |
|                                                | 8  | -4.018242000 | 4.038777000  | 0.616096000  |
|                                                | 6  | -5.088359000 | 3.052124000  | 0.828911000  |
|                                                | 1  | -5.981651000 | 3.617765000  | 0.487941000  |
|                                                | 6  | -5.257498000 | 2.700659000  | 2.305457000  |
|                                                | 1  | -5.373599000 | 3.628638000  | 2.903235000  |
|                                                | 1  | -4.343877000 | 2.177788000  | 2.665167000  |
|                                                | 6  | -4.931497000 | 1.806594000  | -0.043257000 |
|                                                | 1  | -4.012259000 | 1.261123000  | 0.258176000  |
|                                                | 1  | -4.809132000 | 2.104863000  | -1.105618000 |
|                                                | 6  | -6.374308000 | 0.521001000  | 1.610751000  |
|                                                | 1  | -7.292353000 | -0.094111000 | 1.719068000  |
|                                                | 1  | -5.529001000 | -0.111706000 | 1.962472000  |
|                                                | 6  | -6.156070000 | 0.891755000  | 0.135986000  |
|                                                | 1  | -6.030914000 | -0.020219000 | -0.483847000 |
|                                                | 1  | -7.061173000 | 1.412518000  | -0.249852000 |
|                                                | 6  | -6.472411000 | 1.774408000  | 2.493157000  |
|                                                | 1  | -6.560443000 | 1.493652000  | 3.563219000  |
|                                                | 1  | -7.400415000 | 2.333903000  | 2.237757000  |
| Cu(NO <sub>3</sub> ) <sub>2</sub> *2Py-PO-cHex | 29 | -0.278414000 | 1.435978000  | 1.469177000  |
|                                                | 15 | 0.935963000  | -0.199590000 | -1.308025000 |
|                                                | 15 | -1.472887000 | 4.496877000  | 1.306992000  |
|                                                | 8  | 0.610882000  | 0.895287000  | -0.300601000 |
|                                                | 8  | 2.468946000  | -0.189234000 | -1.816090000 |
|                                                | 7  | 0.759060000  | -2.850585000 | -1.668614000 |
|                                                | 8  | 0.105072000  | -0.083154000 | -2.696172000 |
|                                                | 7  | -1.002027000 | 2.555425000  | 3.167532000  |
|                                                | 8  | 1.439566000  | 2.424929000  | 1.924914000  |
|                                                | 8  | -1.152124000 | 3.382023000  | 0.332226000  |
|                                                | 8  | 2.766608000  | 0.684388000  | 1.668673000  |
|                                                | 8  | -0.516357000 | 5.804765000  | 1.280113000  |
|                                                | 6  | 0.667333000  | -4.138150000 | -1.297310000 |
|                                                | 6  | -1.718075000 | 4.645464000  | 4.133774000  |
|                                                | 1  | -2.020316000 | 5.692033000  | 3.982248000  |
|                                                | 7  | 2.625720000  | 1.913604000  | 1.725864000  |
|                                                | 6  | 0.743434000  | -1.915670000 | -0.702865000 |

|   |              |              |              |
|---|--------------|--------------|--------------|
| 6 | 0.563357000  | -4.548832000 | 0.046149000  |
| 1 | 0.504571000  | -5.619494000 | 0.291309000  |
| 6 | -0.935860000 | 2.018554000  | 4.403690000  |
| 6 | -1.389742000 | 3.840224000  | 3.027786000  |
| 8 | 3.569163000  | 2.715840000  | 1.630398000  |
| 6 | -1.265036000 | 2.750272000  | 5.557866000  |
| 1 | -1.203958000 | 2.275722000  | 6.548403000  |
| 6 | 0.625264000  | -2.210483000 | 0.667972000  |
| 1 | 0.599356000  | -1.415545000 | 1.427726000  |
| 6 | -1.657158000 | 4.088854000  | 5.417927000  |
| 1 | -1.911892000 | 4.692521000  | 6.301872000  |
| 6 | 3.205545000  | 1.063113000  | -2.050172000 |
| 1 | 2.662306000  | 1.881996000  | -1.529429000 |
| 6 | 4.593158000  | 0.906596000  | -1.432875000 |
| 1 | 5.067755000  | -0.001481000 | -1.867122000 |
| 1 | 4.489465000  | 0.743336000  | -0.340857000 |
| 6 | 0.534502000  | -3.561168000 | 1.040589000  |
| 1 | 0.444406000  | -3.837464000 | 2.102419000  |
| 6 | 0.932428000  | 5.660944000  | 1.066001000  |
| 1 | 1.248720000  | 4.664139000  | 1.442520000  |
| 6 | 5.459064000  | 2.143021000  | -1.724758000 |
| 1 | 6.476285000  | 1.991747000  | -1.307268000 |
| 1 | 5.029430000  | 3.019878000  | -1.190040000 |
| 6 | -3.342452000 | -1.214814000 | -3.814100000 |
| 1 | -3.743390000 | -1.619823000 | -2.857673000 |
| 1 | -3.648168000 | -1.928039000 | -4.608153000 |
| 6 | 3.260115000  | 1.351393000  | -3.549872000 |
| 1 | 3.696102000  | 0.464307000  | -4.060991000 |
| 1 | 2.230807000  | 1.482882000  | -3.942321000 |
| 6 | 5.527521000  | 2.447161000  | -3.228113000 |
| 1 | 6.120943000  | 3.368290000  | -3.407723000 |
| 1 | 6.063549000  | 1.619660000  | -3.745594000 |
| 6 | -1.365718000 | -0.148452000 | -2.675296000 |
| 1 | -1.691507000 | -0.495786000 | -1.669177000 |
| 6 | 1.626040000  | 6.753174000  | 1.875408000  |
| 1 | 1.385797000  | 6.628455000  | 2.951923000  |
| 1 | 1.217722000  | 7.738721000  | 1.558891000  |
| 6 | -1.808374000 | -1.157352000 | -3.732423000 |
| 1 | -1.386719000 | -0.841149000 | -4.712501000 |
| 1 | -1.381160000 | -2.153930000 | -3.499017000 |
| 6 | -3.944984000 | 0.174903000  | -4.067047000 |
| 1 | -3.636822000 | 0.529043000  | -5.076735000 |
| 1 | -5.053834000 | 0.117925000  | -4.077626000 |
| 6 | 1.247915000  | 5.761163000  | -0.426675000 |
| 1 | 0.824670000  | 6.715586000  | -0.811515000 |
| 1 | 0.742875000  | 4.932912000  | -0.964650000 |
| 6 | -1.939972000 | 1.244584000  | -2.924005000 |
| 1 | -1.518433000 | 1.631606000  | -3.878304000 |
| 1 | -1.615961000 | 1.929930000  | -2.114349000 |
| 6 | 4.122880000  | 2.592720000  | -3.830449000 |
| 1 | 4.179399000  | 2.768711000  | -4.924811000 |
| 1 | 3.628179000  | 3.489627000  | -3.393616000 |

|    |              |              |              |
|----|--------------|--------------|--------------|
| 6  | 3.488302000  | 6.812158000  | 0.146749000  |
| 1  | 4.586363000  | 6.738018000  | -0.000741000 |
| 1  | 3.185160000  | 7.813988000  | -0.233252000 |
| 6  | -3.474517000 | 1.185870000  | -3.011014000 |
| 1  | -3.881267000 | 0.895627000  | -2.016770000 |
| 1  | -3.875556000 | 2.197685000  | -3.229296000 |
| 6  | 2.767054000  | 5.723569000  | -0.661199000 |
| 1  | 2.981910000  | 5.829053000  | -1.745363000 |
| 1  | 3.155511000  | 4.725595000  | -0.358310000 |
| 6  | 3.145506000  | 6.712404000  | 1.640595000  |
| 1  | 3.634572000  | 7.528595000  | 2.211968000  |
| 1  | 3.549113000  | 5.757113000  | 2.043953000  |
| 15 | 0.672491000  | -5.389063000 | -2.638582000 |
| 8  | 0.911108000  | -6.794907000 | -2.144976000 |
| 8  | -0.756402000 | -5.102256000 | -3.365939000 |
| 8  | 1.707758000  | -4.827511000 | -3.770955000 |
| 6  | -1.425650000 | -6.151306000 | -4.137391000 |
| 1  | -1.056271000 | -7.133080000 | -3.765380000 |
| 6  | -2.925122000 | -6.037487000 | -3.871032000 |
| 1  | -3.249698000 | -5.005906000 | -4.134850000 |
| 1  | -3.119136000 | -6.174117000 | -2.786959000 |
| 6  | -3.708223000 | -7.061912000 | -4.707480000 |
| 1  | -4.796519000 | -6.937998000 | -4.528313000 |
| 1  | -3.449018000 | -8.088655000 | -4.363883000 |
| 6  | 5.205025000  | -3.366858000 | -3.782111000 |
| 1  | 5.442436000  | -3.373645000 | -2.694246000 |
| 1  | 5.580438000  | -2.399311000 | -4.176534000 |
| 6  | -1.091379000 | -6.008618000 | -5.623115000 |
| 1  | -1.357118000 | -4.976336000 | -5.942179000 |
| 1  | 0.001920000  | -6.124968000 | -5.772937000 |
| 6  | -3.385638000 | -6.932694000 | -6.203175000 |
| 1  | -3.927174000 | -7.710114000 | -6.782154000 |
| 1  | -3.753827000 | -5.949208000 | -6.573203000 |
| 6  | 3.141669000  | -4.789756000 | -3.482740000 |
| 1  | 3.291200000  | -4.865784000 | -2.380216000 |
| 6  | 3.681641000  | -3.445265000 | -3.967195000 |
| 1  | 3.424512000  | -3.341146000 | -5.044853000 |
| 1  | 3.167118000  | -2.624704000 | -3.426306000 |
| 6  | 5.917075000  | -4.545366000 | -4.462723000 |
| 1  | 5.777083000  | -4.470053000 | -5.564746000 |
| 1  | 7.010975000  | -4.492290000 | -4.279817000 |
| 6  | 3.836813000  | -5.972001000 | -4.158764000 |
| 1  | 3.583366000  | -5.946528000 | -5.241848000 |
| 1  | 3.430070000  | -6.918722000 | -3.747145000 |
| 6  | -1.874779000 | -7.034404000 | -6.458313000 |
| 1  | -1.647691000 | -6.892084000 | -7.535430000 |
| 1  | -1.527190000 | -8.059605000 | -6.198166000 |
| 6  | 5.360658000  | -5.891101000 | -3.973923000 |
| 1  | 5.606392000  | -6.018610000 | -2.895557000 |
| 1  | 5.848368000  | -6.734071000 | -4.506430000 |
| 15 | -0.343891000 | 0.280215000  | 4.510319000  |
| 8  | -0.082248000 | -0.240023000 | 3.108947000  |



|  |   |              |              |              |
|--|---|--------------|--------------|--------------|
|  | 8 | 0.893260000  | 0.272234000  | 5.547862000  |
|  | 8 | -1.394755000 | -0.524037000 | 5.435997000  |
|  | 6 | 2.281803000  | 0.415691000  | 5.082558000  |
|  | 1 | 2.277761000  | 0.378573000  | 3.972649000  |
|  | 6 | 2.836047000  | 1.758796000  | 5.556498000  |
|  | 1 | 2.713251000  | 1.818592000  | 6.660555000  |
|  | 1 | 2.242446000  | 2.584571000  | 5.111481000  |
|  | 6 | 4.322668000  | 1.896752000  | 5.183806000  |
|  | 1 | 4.717592000  | 2.854002000  | 5.583447000  |
|  | 1 | 4.416990000  | 1.959251000  | 4.076898000  |
|  | 6 | -5.154028000 | -1.034021000 | 5.530370000  |
|  | 1 | -5.466016000 | -0.320151000 | 4.735074000  |
|  | 1 | -5.882716000 | -0.918733000 | 6.359456000  |
|  | 6 | 3.086106000  | -0.766693000 | 5.616609000  |
|  | 1 | 2.986563000  | -0.791052000 | 6.724433000  |
|  | 1 | 2.656008000  | -1.712207000 | 5.225795000  |
|  | 6 | 5.148589000  | 0.710751000  | 5.702134000  |
|  | 1 | 6.205730000  | 0.808474000  | 5.377056000  |
|  | 1 | 5.157109000  | 0.727351000  | 6.815390000  |
|  | 6 | -2.729714000 | -0.849658000 | 4.901556000  |
|  | 1 | -2.957103000 | -0.146109000 | 4.071764000  |
|  | 6 | -3.746639000 | -0.653200000 | 6.020438000  |
|  | 1 | -3.454350000 | -1.293464000 | 6.882297000  |
|  | 1 | -3.718899000 | 0.400385000  | 6.368884000  |
|  | 6 | -5.189863000 | -2.463427000 | 4.969760000  |
|  | 1 | -4.992185000 | -3.184121000 | 5.795110000  |
|  | 1 | -6.203452000 | -2.698342000 | 4.582201000  |
|  | 6 | -2.732093000 | -2.276427000 | 4.355529000  |
|  | 1 | -2.406628000 | -2.965641000 | 5.166055000  |
|  | 1 | -1.991750000 | -2.358308000 | 3.532822000  |
|  | 6 | 4.565629000  | -0.626292000 | 5.222327000  |
|  | 1 | 5.145513000  | -1.479019000 | 5.632483000  |
|  | 1 | 4.653264000  | -0.687941000 | 4.114260000  |
|  | 6 | -4.139520000 | -2.658487000 | 3.866706000  |
|  | 1 | -4.402173000 | -2.028488000 | 2.987113000  |
|  | 1 | -4.137737000 | -3.709039000 | 3.508563000  |
|  | 8 | -3.339348000 | 0.929384000  | 2.247725000  |
|  | 8 | -1.842326000 | 0.392264000  | 0.726981000  |
|  | 7 | -3.046013000 | 0.312483000  | 1.210853000  |
|  | 8 | -3.854686000 | -0.395773000 | 0.587633000  |
|  | 8 | -2.861629000 | 5.307978000  | 1.174044000  |
|  | 6 | -4.217701000 | 4.782186000  | 0.970927000  |
|  | 1 | -4.816700000 | 5.715927000  | 0.907347000  |
|  | 6 | -4.701647000 | 3.962416000  | 2.165997000  |
|  | 1 | -4.610323000 | 4.562353000  | 3.095131000  |
|  | 1 | -4.052693000 | 3.067011000  | 2.274282000  |
|  | 6 | -4.350640000 | 4.018890000  | -0.347479000 |
|  | 1 | -3.685833000 | 3.129441000  | -0.321718000 |
|  | 1 | -4.007643000 | 4.660324000  | -1.185694000 |
|  | 6 | -6.309391000 | 2.732016000  | 0.631019000  |
|  | 1 | -7.370785000 | 2.444796000  | 0.476806000  |
|  | 1 | -5.728036000 | 1.784566000  | 0.687091000  |

|                                                |    |              |              |              |
|------------------------------------------------|----|--------------|--------------|--------------|
|                                                | 6  | -5.806515000 | 3.568426000  | -0.554788000 |
|                                                | 1  | -5.885108000 | 2.995924000  | -1.502325000 |
|                                                | 1  | -6.455856000 | 4.464909000  | -0.673619000 |
|                                                | 6  | -6.152579000 | 3.498258000  | 1.952445000  |
|                                                | 1  | -6.468011000 | 2.868989000  | 2.810833000  |
|                                                | 1  | -6.827076000 | 4.384138000  | 1.948124000  |
| Pb(NO <sub>3</sub> ) <sub>2</sub> *3Py-PO-cHex | 82 | -0.480380000 | 2.318560000  | 0.819846000  |
|                                                | 15 | -0.197151000 | 0.844601000  | -3.146682000 |
|                                                | 15 | -1.702519000 | 5.715761000  | -0.250261000 |
|                                                | 8  | -0.379094000 | 1.452041000  | -1.770121000 |
|                                                | 8  | 1.269230000  | 0.225878000  | -3.459225000 |
|                                                | 7  | -1.219136000 | -1.115734000 | -4.696173000 |
|                                                | 8  | -0.391959000 | 1.867427000  | -4.401033000 |
|                                                | 7  | -0.812781000 | 4.894616000  | 2.176181000  |
|                                                | 8  | 1.695324000  | 3.952957000  | 0.601546000  |
|                                                | 8  | -1.584502000 | 4.247075000  | -0.625604000 |
|                                                | 8  | 2.231789000  | 1.845202000  | 0.399836000  |
|                                                | 8  | -0.808444000 | 6.752508000  | -1.117252000 |
|                                                | 6  | -2.019934000 | -2.155536000 | -4.983475000 |
|                                                | 6  | -1.333352000 | 7.255042000  | 2.101987000  |
|                                                | 1  | -1.688064000 | 8.117257000  | 1.518062000  |
|                                                | 7  | 2.582871000  | 3.067795000  | 0.371922000  |
|                                                | 6  | -1.311836000 | -0.572911000 | -3.469498000 |
|                                                | 6  | -2.935118000 | -2.704336000 | -4.064204000 |
|                                                | 1  | -3.557591000 | -3.563789000 | -4.353565000 |
|                                                | 6  | -0.452681000 | 5.035587000  | 3.464862000  |
|                                                | 6  | -1.244313000 | 5.979623000  | 1.510324000  |
|                                                | 8  | 3.758508000  | 3.392340000  | 0.127677000  |
|                                                | 6  | -0.513566000 | 6.265613000  | 4.146990000  |
|                                                | 1  | -0.211720000 | 6.335191000  | 5.202679000  |
|                                                | 6  | -2.209444000 | -1.024062000 | -2.483076000 |
|                                                | 1  | -2.267064000 | -0.521236000 | -1.505890000 |
|                                                | 6  | -0.961682000 | 7.394617000  | 3.446116000  |
|                                                | 1  | -1.019321000 | 8.374395000  | 3.943611000  |
|                                                | 6  | 2.490546000  | 0.855413000  | -2.940312000 |
|                                                | 1  | 2.238709000  | 1.331689000  | -1.967923000 |
|                                                | 6  | 3.511639000  | -0.253549000 | -2.700954000 |
|                                                | 1  | 3.673853000  | -0.800393000 | -3.656931000 |
|                                                | 1  | 3.100694000  | -0.982912000 | -1.972261000 |
|                                                | 6  | -3.033412000 | -2.117287000 | -2.794674000 |
|                                                | 1  | -3.748629000 | -2.504380000 | -2.053389000 |
|                                                | 6  | 0.604380000  | 6.459578000  | -1.411597000 |
|                                                | 1  | 0.811491000  | 5.404678000  | -1.129557000 |
|                                                | 6  | 4.839829000  | 0.338663000  | -2.200581000 |
|                                                | 1  | 5.579769000  | -0.475099000 | -2.050276000 |
|                                                | 1  | 4.674172000  | 0.807771000  | -1.205336000 |
|                                                | 6  | -3.246418000 | 2.699748000  | -6.756159000 |
|                                                | 1  | -4.088419000 | 2.152703000  | -6.274977000 |
|                                                | 1  | -3.349809000 | 2.529545000  | -7.848516000 |
|                                                | 6  | 3.007843000  | 1.910647000  | -3.919196000 |
|                                                | 1  | 3.146493000  | 1.429497000  | -4.912803000 |
|                                                | 1  | 2.249780000  | 2.711103000  | -4.046526000 |

|    |              |              |               |
|----|--------------|--------------|---------------|
| 6  | 5.382248000  | 1.398424000  | -3.171097000  |
| 1  | 6.319320000  | 1.841400000  | -2.772706000  |
| 1  | 5.647893000  | 0.910765000  | -4.136297000  |
| 6  | -1.715077000 | 2.376371000  | -4.773855000  |
| 1  | -2.489864000 | 1.821873000  | -4.195350000  |
| 6  | 1.503451000  | 7.382151000  | -0.589158000  |
| 1  | 1.340188000  | 7.202679000  | 0.493530000   |
| 1  | 1.211402000  | 8.435473000  | -0.797184000  |
| 6  | -1.915064000 | 2.110158000  | -6.265173000  |
| 1  | -1.067246000 | 2.579337000  | -6.812368000  |
| 1  | -1.865630000 | 1.018944000  | -6.456695000  |
| 6  | -3.357210000 | 4.194880000  | -6.424201000  |
| 1  | -2.588244000 | 4.755556000  | -7.002080000  |
| 1  | -4.343878000 | 4.589969000  | -6.745535000  |
| 6  | 0.820512000  | 6.636575000  | -2.912717000  |
| 1  | 0.512178000  | 7.668629000  | -3.192096000  |
| 1  | 0.163580000  | 5.935442000  | -3.466683000  |
| 6  | -1.811411000 | 3.862181000  | -4.432730000  |
| 1  | -0.964051000 | 4.385709000  | -4.928545000  |
| 1  | -1.692279000 | 4.002623000  | -3.338961000  |
| 6  | 4.340748000  | 2.497905000  | -3.425975000  |
| 1  | 4.718968000  | 3.236374000  | -4.163499000  |
| 1  | 4.163938000  | 3.056507000  | -2.479774000  |
| 6  | 3.223885000  | 7.324087000  | -2.460177000  |
| 1  | 4.285885000  | 7.110777000  | -2.704422000  |
| 1  | 3.040010000  | 8.383875000  | -2.748242000  |
| 6  | -3.145385000 | 4.447903000  | -4.924208000  |
| 1  | -3.980980000 | 3.984227000  | -4.352802000  |
| 1  | -3.180567000 | 5.534195000  | -4.698232000  |
| 6  | 2.297065000  | 6.412190000  | -3.277338000  |
| 1  | 2.442062000  | 6.577196000  | -4.365292000  |
| 1  | 2.564224000  | 5.348508000  | -3.083534000  |
| 6  | 2.981097000  | 7.158056000  | -0.953287000  |
| 1  | 3.617854000  | 7.858935000  | -0.374040000  |
| 1  | 3.275637000  | 6.131642000  | -0.641280000  |
| 15 | -1.908830000 | -2.842190000 | -6.680277000  |
| 8  | -2.584167000 | -4.183205000 | -6.832953000  |
| 8  | -2.513535000 | -1.610080000 | -7.556395000  |
| 8  | -0.330539000 | -2.779736000 | -7.100857000  |
| 6  | -2.945907000 | -1.822620000 | -8.939804000  |
| 1  | -3.065496000 | -2.917970000 | -9.097282000  |
| 6  | -4.299487000 | -1.137834000 | -9.119339000  |
| 1  | -4.188045000 | -0.067497000 | -8.834574000  |
| 1  | -5.036063000 | -1.586978000 | -8.421260000  |
| 6  | -4.778941000 | -1.245336000 | -10.575748000 |
| 1  | -5.743820000 | -0.709489000 | -10.692879000 |
| 1  | -4.982259000 | -2.313345000 | -10.815191000 |
| 6  | 2.947423000  | -3.802157000 | -5.498914000  |
| 1  | 2.589608000  | -4.185615000 | -4.516800000  |
| 1  | 3.862993000  | -3.210746000 | -5.287847000  |
| 6  | -1.890968000 | -1.275499000 | -9.902389000  |
| 1  | -1.706180000 | -0.208875000 | -9.645077000  |

|  |    |              |              |               |
|--|----|--------------|--------------|---------------|
|  | 1  | -0.935205000 | -1.818459000 | -9.753612000  |
|  | 6  | -3.730886000 | -0.698468000 | -11.555899000 |
|  | 1  | -4.078956000 | -0.826698000 | -12.602433000 |
|  | 1  | -3.614477000 | 0.396905000  | -11.393503000 |
|  | 6  | 0.616647000  | -3.689900000 | -6.457144000  |
|  | 1  | 0.159672000  | -4.078005000 | -5.516718000  |
|  | 6  | 1.870511000  | -2.890724000 | -6.107627000  |
|  | 1  | 2.252619000  | -2.424446000 | -7.042976000  |
|  | 1  | 1.602016000  | -2.065605000 | -5.416491000  |
|  | 6  | 3.266353000  | -4.989903000 | -6.419221000  |
|  | 1  | 3.734624000  | -4.611640000 | -7.355936000  |
|  | 1  | 4.013701000  | -5.657417000 | -5.940907000  |
|  | 6  | 0.919053000  | -4.868667000 | -7.382745000  |
|  | 1  | 1.271555000  | -4.461622000 | -8.356361000  |
|  | 1  | -0.018774000 | -5.428304000 | -7.578542000  |
|  | 6  | -2.371811000 | -1.385504000 | -11.358476000 |
|  | 1  | -1.609650000 | -0.950729000 | -12.038278000 |
|  | 1  | -2.460870000 | -2.460245000 | -11.635024000 |
|  | 6  | 1.996842000  | -5.779142000 | -6.772798000  |
|  | 1  | 1.593625000  | -6.256010000 | -5.851133000  |
|  | 1  | 2.231191000  | -6.606058000 | -7.475088000  |
|  | 15 | 0.143673000  | 3.512724000  | 4.299389000   |
|  | 8  | 0.279176000  | 2.365681000  | 3.312421000   |
|  | 8  | 1.487521000  | 3.908810000  | 5.105147000   |
|  | 8  | -0.823329000 | 3.283802000  | 5.577540000   |
|  | 6  | 2.827285000  | 3.591929000  | 4.588037000   |
|  | 1  | 2.733587000  | 2.699035000  | 3.932184000   |
|  | 6  | 3.374788000  | 4.767082000  | 3.777992000   |
|  | 1  | 3.318312000  | 5.682992000  | 4.406836000   |
|  | 1  | 2.738064000  | 4.931513000  | 2.883366000   |
|  | 6  | 4.829140000  | 4.501967000  | 3.352468000   |
|  | 1  | 5.221350000  | 5.384244000  | 2.804933000   |
|  | 1  | 4.844318000  | 3.658401000  | 2.627553000   |
|  | 6  | -4.552798000 | 3.619845000  | 6.214695000   |
|  | 1  | -4.904699000 | 3.940151000  | 5.207769000   |
|  | 1  | -5.108131000 | 4.237522000  | 6.950830000   |
|  | 6  | 3.700948000  | 3.254704000  | 5.793846000   |
|  | 1  | 3.666609000  | 4.113955000  | 6.499489000   |
|  | 1  | 3.275039000  | 2.376652000  | 6.322716000   |
|  | 6  | 5.721194000  | 4.167888000  | 4.555801000   |
|  | 1  | 6.753437000  | 3.938134000  | 4.217354000   |
|  | 1  | 5.796843000  | 5.061140000  | 5.216253000   |
|  | 6  | -2.258303000 | 3.022627000  | 5.368209000   |
|  | 1  | -2.525368000 | 3.293041000  | 4.322629000   |
|  | 6  | -3.045507000 | 3.901820000  | 6.335717000   |
|  | 1  | -2.698564000 | 3.681637000  | 7.369663000   |
|  | 1  | -2.823517000 | 4.970701000  | 6.134978000   |
|  | 6  | -4.867184000 | 2.129130000  | 6.408159000   |
|  | 1  | -4.631957000 | 1.838992000  | 7.457231000   |
|  | 1  | -5.953100000 | 1.945511000  | 6.266825000   |
|  | 6  | -2.542477000 | 1.536265000  | 5.573651000   |
|  | 1  | -2.181168000 | 1.247194000  | 6.585777000   |

|  |    |              |              |              |
|--|----|--------------|--------------|--------------|
|  | 1  | -1.964369000 | 0.944306000  | 4.835424000  |
|  | 6  | 5.151693000  | 2.990857000  | 5.360666000  |
|  | 1  | 5.775881000  | 2.787082000  | 6.255478000  |
|  | 1  | 5.187165000  | 2.069005000  | 4.737579000  |
|  | 6  | -4.049023000 | 1.256124000  | 5.445858000  |
|  | 1  | -4.361292000 | 1.456031000  | 4.397182000  |
|  | 1  | -4.244965000 | 0.179049000  | 5.631404000  |
|  | 8  | -2.827343000 | 2.283482000  | 2.108188000  |
|  | 8  | -2.924982000 | 1.057655000  | 0.301245000  |
|  | 7  | -3.475514000 | 1.467732000  | 1.367338000  |
|  | 8  | -4.617125000 | 1.092888000  | 1.688854000  |
|  | 8  | -3.119461000 | 6.449068000  | -0.490666000 |
|  | 6  | -4.452634000 | 5.917530000  | -0.178184000 |
|  | 1  | -5.100173000 | 6.800672000  | -0.365046000 |
|  | 6  | -4.606236000 | 5.495945000  | 1.283395000  |
|  | 1  | -4.301868000 | 6.325435000  | 1.954675000  |
|  | 1  | -3.936805000 | 4.630636000  | 1.488312000  |
|  | 6  | -4.858092000 | 4.795079000  | -1.134345000 |
|  | 1  | -4.187236000 | 3.924005000  | -0.973402000 |
|  | 1  | -4.722791000 | 5.130669000  | -2.183298000 |
|  | 6  | -6.533432000 | 3.980502000  | 0.597123000  |
|  | 1  | -7.604889000 | 3.750020000  | 0.776168000  |
|  | 1  | -5.970215000 | 3.045214000  | 0.811484000  |
|  | 6  | -6.316951000 | 4.384663000  | -0.869051000 |
|  | 1  | -6.599475000 | 3.554600000  | -1.549445000 |
|  | 1  | -6.987003000 | 5.237729000  | -1.119732000 |
|  | 6  | -6.063234000 | 5.081999000  | 1.558934000  |
|  | 1  | -6.159286000 | 4.748767000  | 2.613715000  |
|  | 1  | -6.719368000 | 5.974490000  | 1.449288000  |
|  | 15 | 0.216131000  | -1.419361000 | 2.333972000  |
|  | 8  | -0.126069000 | -0.236139000 | 1.450433000  |
|  | 8  | -0.805540000 | -2.676591000 | 2.172754000  |
|  | 7  | 2.065252000  | -3.417765000 | 2.425116000  |
|  | 8  | 0.218858000  | -0.960957000 | 3.894754000  |
|  | 6  | 3.258287000  | -3.977735000 | 2.159944000  |
|  | 6  | 1.841717000  | -2.175081000 | 1.962652000  |
|  | 6  | 4.267107000  | -3.334259000 | 1.416322000  |
|  | 1  | 5.216279000  | -3.852683000 | 1.216338000  |
|  | 6  | 2.789914000  | -1.429510000 | 1.234984000  |
|  | 1  | 2.564508000  | -0.403006000 | 0.906522000  |
|  | 6  | -2.242234000 | -2.435647000 | 1.978013000  |
|  | 1  | -2.354226000 | -1.437906000 | 1.499671000  |
|  | 6  | -2.771138000 | -3.504291000 | 1.025255000  |
|  | 1  | -2.565128000 | -4.506125000 | 1.463815000  |
|  | 1  | -2.221221000 | -3.447609000 | 0.062783000  |
|  | 6  | 4.026839000  | -2.031843000 | 0.956935000  |
|  | 1  | 4.793586000  | -1.488493000 | 0.383838000  |
|  | 6  | -4.282844000 | -3.325320000 | 0.809246000  |
|  | 1  | -4.660689000 | -4.115594000 | 0.127529000  |
|  | 1  | -4.462971000 | -2.352506000 | 0.297728000  |
|  | 6  | 1.046562000  | -3.417152000 | 6.711972000  |
|  | 1  | 2.064456000  | -3.742361000 | 6.400738000  |

|  |    |              |              |              |
|--|----|--------------|--------------|--------------|
|  | 1  | 0.528931000  | -4.328249000 | 7.078334000  |
|  | 6  | -2.978044000 | -2.447298000 | 3.318619000  |
|  | 1  | -2.768488000 | -3.414631000 | 3.826857000  |
|  | 1  | -2.583430000 | -1.642298000 | 3.972263000  |
|  | 6  | -5.046860000 | -3.338728000 | 2.141136000  |
|  | 1  | -6.129981000 | -3.169352000 | 1.965050000  |
|  | 1  | -4.954933000 | -4.346372000 | 2.605852000  |
|  | 6  | 0.966197000  | -1.574568000 | 4.993885000  |
|  | 1  | 1.990188000  | -1.809292000 | 4.626193000  |
|  | 6  | 0.302964000  | -2.861473000 | 5.485623000  |
|  | 1  | -0.753484000 | -2.635047000 | 5.748896000  |
|  | 1  | 0.290119000  | -3.611016000 | 4.668308000  |
|  | 6  | 1.164203000  | -2.371897000 | 7.829939000  |
|  | 1  | 0.148596000  | -2.138091000 | 8.221791000  |
|  | 1  | 1.744861000  | -2.783423000 | 8.682253000  |
|  | 6  | 1.066517000  | -0.521394000 | 6.096275000  |
|  | 1  | 0.035821000  | -0.222217000 | 6.388277000  |
|  | 1  | 1.565546000  | 0.385575000  | 5.696158000  |
|  | 6  | -4.491810000 | -2.279929000 | 3.104501000  |
|  | 1  | -5.013855000 | -2.324996000 | 4.083267000  |
|  | 1  | -4.687443000 | -1.266797000 | 2.687792000  |
|  | 6  | 1.815368000  | -1.079465000 | 7.316276000  |
|  | 1  | 2.872147000  | -1.287699000 | 7.034557000  |
|  | 1  | 1.850187000  | -0.311124000 | 8.116563000  |
|  | 15 | 3.574035000  | -5.654772000 | 2.834678000  |
|  | 8  | 4.769455000  | -6.329016000 | 2.206455000  |
|  | 8  | 3.655581000  | -5.361006000 | 4.434568000  |
|  | 8  | 2.155585000  | -6.459309000 | 2.744115000  |
|  | 6  | 4.466702000  | -6.217088000 | 5.303473000  |
|  | 1  | 5.184651000  | -6.770792000 | 4.658541000  |
|  | 6  | 5.238912000  | -5.314428000 | 6.263052000  |
|  | 1  | 4.506294000  | -4.683875000 | 6.814796000  |
|  | 1  | 5.890334000  | -4.628479000 | 5.682804000  |
|  | 6  | 6.061240000  | -6.152135000 | 7.255276000  |
|  | 1  | 6.586620000  | -5.481558000 | 7.966752000  |
|  | 1  | 6.853408000  | -6.702278000 | 6.699257000  |
|  | 6  | -0.382517000 | -7.169195000 | 0.018248000  |
|  | 1  | 0.065914000  | -6.614301000 | -0.836621000 |
|  | 1  | -1.474243000 | -6.971403000 | -0.020452000 |
|  | 6  | 3.571138000  | -7.211960000 | 6.043425000  |
|  | 1  | 2.790051000  | -6.639671000 | 6.591469000  |
|  | 1  | 3.048039000  | -7.860540000 | 5.310430000  |
|  | 6  | 5.180038000  | -7.159662000 | 8.008112000  |
|  | 1  | 5.800565000  | -7.783085000 | 8.685688000  |
|  | 1  | 4.463170000  | -6.606303000 | 8.655898000  |
|  | 6  | 1.688302000  | -6.927564000 | 1.438118000  |
|  | 1  | 2.230145000  | -6.368550000 | 0.639937000  |
|  | 6  | 0.195463000  | -6.623821000 | 1.333522000  |
|  | 1  | -0.315267000 | -7.101401000 | 2.199259000  |
|  | 1  | 0.033612000  | -5.530123000 | 1.422575000  |
|  | 6  | -0.094138000 | -8.668976000 | -0.144888000 |
|  | 1  | -0.640885000 | -9.234124000 | 0.643380000  |

|                                                |    |              |               |              |
|------------------------------------------------|----|--------------|---------------|--------------|
|                                                | 1  | -0.482531000 | -9.031970000  | -1.119685000 |
|                                                | 6  | 1.989432000  | -8.418812000  | 1.287048000  |
|                                                | 1  | 1.537864000  | -8.951291000  | 2.153410000  |
|                                                | 1  | 3.086688000  | -8.574873000  | 1.338658000  |
|                                                | 6  | 4.395468000  | -8.050668000  | 7.033955000  |
|                                                | 1  | 3.726195000  | -8.743032000  | 7.585922000  |
|                                                | 1  | 5.109009000  | -8.690106000  | 6.467024000  |
|                                                | 6  | 1.408482000  | -8.964594000  | -0.027085000 |
|                                                | 1  | 1.942551000  | -8.497861000  | -0.885290000 |
|                                                | 1  | 1.600318000  | -10.055588000 | -0.097521000 |
| Cd(NO <sub>3</sub> ) <sub>2</sub> *3Py-PO-cHex | 48 | -0.680598000 | 2.458240000   | 0.998463000  |
|                                                | 15 | -0.067033000 | 0.999393000   | -2.585576000 |
|                                                | 15 | -1.847141000 | 5.718146000   | -0.034163000 |
|                                                | 8  | -0.431750000 | 1.620279000   | -1.250162000 |
|                                                | 8  | 1.499410000  | 0.706759000   | -2.857081000 |
|                                                | 7  | -0.584544000 | -1.239064000  | -4.001151000 |
|                                                | 8  | -0.490160000 | 1.882377000   | -3.884260000 |
|                                                | 7  | -0.768710000 | 4.892070000   | 2.288842000  |
|                                                | 8  | 1.212163000  | 3.623756000   | 0.432232000  |
|                                                | 8  | -1.808239000 | 4.237267000   | -0.375760000 |
|                                                | 8  | 2.335180000  | 1.760308000   | 0.729828000  |
|                                                | 8  | -1.001038000 | 6.712457000   | -0.994806000 |
|                                                | 6  | -1.095481000 | -2.464477000  | -4.206683000 |
|                                                | 6  | -1.221440000 | 7.266119000   | 2.272686000  |
|                                                | 1  | -1.613517000 | 8.141117000   | 1.733446000  |
|                                                | 7  | 2.324392000  | 2.964760000   | 0.394122000  |
|                                                | 6  | -0.789866000 | -0.669692000  | -2.800766000 |
|                                                | 6  | -1.831080000 | -3.170464000  | -3.234682000 |
|                                                | 1  | -2.219733000 | -4.174214000  | -3.461346000 |
|                                                | 6  | -0.269342000 | 5.014040000   | 3.530759000  |
|                                                | 6  | -1.230725000 | 5.992134000   | 1.672226000  |
|                                                | 8  | 3.351985000  | 3.563172000   | 0.023879000  |
|                                                | 6  | -0.209167000 | 6.242735000   | 4.214953000  |
|                                                | 1  | 0.212487000  | 6.297812000   | 5.229530000  |
|                                                | 6  | -1.507362000 | -1.283639000  | -1.757560000 |
|                                                | 1  | -1.620294000 | -0.771726000  | -0.789983000 |
|                                                | 6  | -0.698851000 | 7.387525000   | 3.568285000  |
|                                                | 1  | -0.671651000 | 8.366477000   | 4.070069000  |
|                                                | 6  | 2.508119000  | 1.720293000   | -3.202826000 |
|                                                | 1  | 2.160091000  | 2.707153000   | -2.823666000 |
|                                                | 6  | 3.807194000  | 1.333311000   | -2.498121000 |
|                                                | 1  | 4.069728000  | 0.295575000   | -2.804612000 |
|                                                | 1  | 3.651442000  | 1.330433000   | -1.400786000 |
|                                                | 6  | -2.039927000 | -2.561539000  | -1.989180000 |
|                                                | 1  | -2.607355000 | -3.080569000  | -1.202509000 |
|                                                | 6  | 0.388122000  | 6.412183000   | -1.373599000 |
|                                                | 1  | 0.624058000  | 5.372633000   | -1.059258000 |
|                                                | 6  | 4.942855000  | 2.295310000   | -2.882646000 |
|                                                | 1  | 5.882566000  | 1.978783000   | -2.383670000 |
|                                                | 1  | 4.704261000  | 3.306775000   | -2.485381000 |
|                                                | 6  | -3.612139000 | 1.988476000   | -6.042353000 |
|                                                | 1  | -4.313806000 | 1.388443000   | -5.420265000 |

|  |    |              |              |               |
|--|----|--------------|--------------|---------------|
|  | 1  | -3.774289000 | 1.667582000  | -7.092823000  |
|  | 6  | 2.681924000  | 1.778786000  | -4.721560000  |
|  | 1  | 2.920370000  | 0.753206000  | -5.081149000  |
|  | 1  | 1.727342000  | 2.080841000  | -5.196185000  |
|  | 6  | 5.132165000  | 2.373579000  | -4.403548000  |
|  | 1  | 5.924181000  | 3.109538000  | -4.656893000  |
|  | 1  | 5.484938000  | 1.387104000  | -4.780988000  |
|  | 6  | -1.902580000 | 2.142181000  | -4.193523000  |
|  | 1  | -2.535639000 | 1.556119000  | -3.488204000  |
|  | 6  | 1.334209000  | 7.379304000  | -0.661770000  |
|  | 1  | 1.250561000  | 7.251556000  | 0.437640000   |
|  | 1  | 1.018051000  | 8.419868000  | -0.897417000  |
|  | 6  | -2.167815000 | 1.671540000  | -5.623278000  |
|  | 1  | -1.455959000 | 2.200598000  | -6.295467000  |
|  | 1  | -1.951198000 | 0.587171000  | -5.709375000  |
|  | 6  | -3.932332000 | 3.480713000  | -5.871211000  |
|  | 1  | -3.312146000 | 4.071656000  | -6.582375000  |
|  | 1  | -4.992036000 | 3.680300000  | -6.135890000  |
|  | 6  | 0.491882000  | 6.527232000  | -2.892748000  |
|  | 1  | 0.147094000  | 7.542834000  | -3.189454000  |
|  | 1  | -0.194021000 | 5.795635000  | -3.366552000  |
|  | 6  | -2.199982000 | 3.628908000  | -4.013826000  |
|  | 1  | -1.484200000 | 4.200700000  | -4.645198000  |
|  | 1  | -2.023666000 | 3.922093000  | -2.958823000  |
|  | 6  | 3.817627000  | 2.741951000  | -5.105095000  |
|  | 1  | 3.946074000  | 2.744635000  | -6.207640000  |
|  | 1  | 3.528352000  | 3.779019000  | -4.821796000  |
|  | 6  | 2.914984000  | 7.255635000  | -2.647154000  |
|  | 1  | 3.958254000  | 7.039377000  | -2.960320000  |
|  | 1  | 2.701434000  | 8.302449000  | -2.961145000  |
|  | 6  | -3.642793000 | 3.949794000  | -4.438130000  |
|  | 1  | -4.347979000 | 3.448345000  | -3.737791000  |
|  | 1  | -3.826688000 | 5.039662000  | -4.335752000  |
|  | 6  | 1.940056000  | 6.305878000  | -3.358098000  |
|  | 1  | 2.002836000  | 6.429786000  | -4.459403000  |
|  | 1  | 2.234010000  | 5.253223000  | -3.145284000  |
|  | 6  | 2.783227000  | 7.145885000  | -1.121430000  |
|  | 1  | 3.457283000  | 7.868470000  | -0.615789000  |
|  | 1  | 3.101371000  | 6.130805000  | -0.795571000  |
|  | 15 | -0.764414000 | -3.232100000 | -5.837974000  |
|  | 8  | -1.193470000 | -4.676751000 | -5.918790000  |
|  | 8  | -1.486386000 | -2.186088000 | -6.853294000  |
|  | 8  | 0.813847000  | -2.937275000 | -6.154504000  |
|  | 6  | -1.751315000 | -2.572304000 | -8.242463000  |
|  | 1  | -1.648853000 | -3.678166000 | -8.316476000  |
|  | 6  | -3.188919000 | -2.178780000 | -8.576273000  |
|  | 1  | -3.306594000 | -1.089521000 | -8.379710000  |
|  | 1  | -3.885495000 | -2.711839000 | -7.896479000  |
|  | 6  | -3.510430000 | -2.482257000 | -10.048444000 |
|  | 1  | -4.545712000 | -2.156232000 | -10.280230000 |
|  | 1  | -3.485069000 | -3.583723000 | -10.207848000 |
|  | 6  | 4.034130000  | -3.314716000 | -4.187968000  |



|  |    |              |              |               |
|--|----|--------------|--------------|---------------|
|  | 1  | 3.648046000  | -3.730102000 | -3.229677000  |
|  | 1  | 4.803869000  | -2.563021000 | -3.913653000  |
|  | 6  | -0.739343000 | -1.898032000 | -9.169624000  |
|  | 1  | -0.782827000 | -0.800642000 | -8.991687000  |
|  | 1  | 0.285377000  | -2.232485000 | -8.907813000  |
|  | 6  | -2.504278000 | -1.811501000 | -10.994947000 |
|  | 1  | -2.729071000 | -2.080036000 | -12.048583000 |
|  | 1  | -2.612400000 | -0.705851000 | -10.920439000 |
|  | 6  | 1.834205000  | -3.644462000 | -5.380197000  |
|  | 1  | 1.356683000  | -4.086148000 | -4.474280000  |
|  | 6  | 2.884338000  | -2.626291000 | -4.939861000  |
|  | 1  | 3.275661000  | -2.118616000 | -5.849602000  |
|  | 1  | 2.404651000  | -1.846371000 | -4.313580000  |
|  | 6  | 4.651742000  | -4.449667000 | -5.018230000  |
|  | 1  | 5.144528000  | -4.018183000 | -5.918673000  |
|  | 1  | 5.448302000  | -4.961684000 | -4.438414000  |
|  | 6  | 2.435514000  | -4.772678000 | -6.218342000  |
|  | 1  | 2.813685000  | -4.334685000 | -7.168609000  |
|  | 1  | 1.636764000  | -5.496137000 | -6.482514000  |
|  | 6  | -1.062076000 | -2.202780000 | -10.641728000 |
|  | 1  | -0.339543000 | -1.676672000 | -11.299876000 |
|  | 1  | -0.921648000 | -3.291055000 | -10.829583000 |
|  | 6  | 3.584029000  | -5.460566000 | -5.462971000  |
|  | 1  | 3.173310000  | -5.977360000 | -4.566467000  |
|  | 1  | 4.032489000  | -6.250621000 | -6.100654000  |
|  | 15 | 0.322894000  | 3.444363000  | 4.269916000   |
|  | 8  | 0.263255000  | 2.322169000  | 3.249669000   |
|  | 8  | 1.768263000  | 3.725091000  | 4.935766000   |
|  | 8  | -0.508765000 | 3.241578000  | 5.644611000   |
|  | 6  | 3.023783000  | 3.405720000  | 4.241674000   |
|  | 1  | 2.804467000  | 2.623914000  | 3.482414000   |
|  | 6  | 3.573522000  | 4.654843000  | 3.552719000   |
|  | 1  | 3.649500000  | 5.466386000  | 4.309928000   |
|  | 1  | 2.861985000  | 4.995498000  | 2.770880000   |
|  | 6  | 4.953384000  | 4.372669000  | 2.934627000   |
|  | 1  | 5.350958000  | 5.303081000  | 2.477942000   |
|  | 1  | 4.829002000  | 3.647854000  | 2.100384000   |
|  | 6  | -4.140349000 | 3.948456000  | 6.524964000   |
|  | 1  | -4.563670000 | 4.158440000  | 5.516629000   |
|  | 1  | -4.585648000 | 4.696575000  | 7.213294000   |
|  | 6  | 3.988382000  | 2.848584000  | 5.285853000   |
|  | 1  | 4.090365000  | 3.597806000  | 6.101889000   |
|  | 1  | 3.557184000  | 1.930095000  | 5.735687000   |
|  | 6  | 5.935662000  | 3.812557000  | 3.972013000   |
|  | 1  | 6.907959000  | 3.574565000  | 3.491494000   |
|  | 1  | 6.144936000  | 4.591318000  | 4.739882000   |
|  | 6  | -1.971635000 | 3.077825000  | 5.580256000   |
|  | 1  | -2.304746000 | 3.226251000  | 4.528453000   |
|  | 6  | -2.614354000 | 4.131580000  | 6.478834000   |
|  | 1  | -2.186170000 | 4.025867000  | 7.500243000   |
|  | 1  | -2.348784000 | 5.146344000  | 6.115977000   |
|  | 6  | -4.524423000 | 2.522893000  | 6.947069000   |

|  |    |              |              |              |
|--|----|--------------|--------------|--------------|
|  | 1  | -4.205919000 | 2.354922000  | 8.000669000  |
|  | 1  | -5.627891000 | 2.401223000  | 6.927767000  |
|  | 6  | -2.330505000 | 1.655597000  | 6.005382000  |
|  | 1  | -1.896581000 | 1.470537000  | 7.013061000  |
|  | 1  | -1.861828000 | 0.933046000  | 5.305714000  |
|  | 6  | 5.363460000  | 2.565158000  | 4.660377000  |
|  | 1  | 6.058062000  | 2.191838000  | 5.441451000  |
|  | 1  | 5.263947000  | 1.746936000  | 3.912128000  |
|  | 6  | -3.857409000 | 1.476978000  | 6.042242000  |
|  | 1  | -4.256100000 | 1.574142000  | 5.007972000  |
|  | 1  | -4.105338000 | 0.449223000  | 6.380670000  |
|  | 8  | -2.642146000 | 2.374600000  | 2.162775000  |
|  | 8  | -3.562738000 | 1.379014000  | 0.431493000  |
|  | 7  | -3.656851000 | 1.789682000  | 1.604597000  |
|  | 8  | -4.701524000 | 1.676018000  | 2.274715000  |
|  | 8  | -3.247135000 | 6.512046000  | -0.162656000 |
|  | 6  | -4.588816000 | 6.013834000  | 0.156201000  |
|  | 1  | -5.199016000 | 6.940974000  | 0.105209000  |
|  | 6  | -4.696910000 | 5.436124000  | 1.567210000  |
|  | 1  | -4.356903000 | 6.188366000  | 2.309517000  |
|  | 1  | -4.024655000 | 4.555115000  | 1.660570000  |
|  | 6  | -5.086062000 | 5.037578000  | -0.909612000 |
|  | 1  | -4.436988000 | 4.135786000  | -0.901663000 |
|  | 1  | -4.990739000 | 5.504949000  | -1.911466000 |
|  | 6  | -6.692406000 | 4.049362000  | 0.788041000  |
|  | 1  | -7.757970000 | 3.815363000  | 0.995667000  |
|  | 1  | -6.139016000 | 3.087102000  | 0.849939000  |
|  | 6  | -6.542198000 | 4.637002000  | -0.622244000 |
|  | 1  | -6.886544000 | 3.910999000  | -1.388033000 |
|  | 1  | -7.195310000 | 5.533101000  | -0.723785000 |
|  | 6  | -6.147356000 | 5.007804000  | 1.858109000  |
|  | 1  | -6.194735000 | 4.537248000  | 2.862321000  |
|  | 1  | -6.790708000 | 5.915211000  | 1.904600000  |
|  | 15 | -0.319045000 | -1.221172000 | 2.057440000  |
|  | 8  | -0.746414000 | 0.048638000  | 1.342740000  |
|  | 8  | -1.438515000 | -2.399703000 | 2.056387000  |
|  | 7  | 1.386569000  | -3.309774000 | 1.715483000  |
|  | 8  | 0.073440000  | -0.890728000 | 3.593944000  |
|  | 6  | 2.411762000  | -3.960235000 | 1.137458000  |
|  | 6  | 1.093110000  | -2.077463000 | 1.263430000  |
|  | 6  | 3.175166000  | -3.422167000 | 0.083589000  |
|  | 1  | 3.993889000  | -4.010039000 | -0.356835000 |
|  | 6  | 1.797862000  | -1.440874000 | 0.224222000  |
|  | 1  | 1.518703000  | -0.428744000 | -0.099632000 |
|  | 6  | -2.887220000 | -2.172755000 | 2.074419000  |
|  | 1  | -3.124742000 | -1.441432000 | 1.270102000  |
|  | 6  | -3.537245000 | -3.519311000 | 1.759556000  |
|  | 1  | -3.195383000 | -4.254815000 | 2.520872000  |
|  | 1  | -3.182077000 | -3.887275000 | 0.774727000  |
|  | 6  | 2.858548000  | -2.135794000 | -0.376312000 |
|  | 1  | 3.429059000  | -1.677387000 | -1.198447000 |
|  | 6  | -5.069611000 | -3.415411000 | 1.789178000  |

|    |              |              |              |
|----|--------------|--------------|--------------|
| 1  | -5.513434000 | -4.411761000 | 1.583546000  |
| 1  | -5.409365000 | -2.744712000 | 0.968254000  |
| 6  | 0.890990000  | -3.557571000 | 6.212918000  |
| 1  | 1.738667000  | -4.081181000 | 5.717136000  |
| 1  | 0.269217000  | -4.348471000 | 6.681913000  |
| 6  | -3.361564000 | -1.619132000 | 3.418889000  |
| 1  | -3.001426000 | -2.295879000 | 4.224551000  |
| 1  | -2.908836000 | -0.622053000 | 3.598827000  |
| 6  | -5.563787000 | -2.863720000 | 3.133453000  |
| 1  | -6.668499000 | -2.752500000 | 3.122388000  |
| 1  | -5.326492000 | -3.595712000 | 3.938100000  |
| 6  | 0.881537000  | -1.688496000 | 4.520294000  |
| 1  | 1.732329000  | -2.124506000 | 3.952859000  |
| 6  | 0.065077000  | -2.819337000 | 5.146099000  |
| 1  | -0.847082000 | -2.381590000 | 5.608193000  |
| 1  | -0.266737000 | -3.521539000 | 4.354768000  |
| 6  | 1.440127000  | -2.594515000 | 7.274805000  |
| 1  | 0.591820000  | -2.157297000 | 7.848219000  |
| 1  | 2.066851000  | -3.145766000 | 8.007152000  |
| 6  | 1.421619000  | -0.716727000 | 5.568201000  |
| 1  | 0.559030000  | -0.203648000 | 6.048525000  |
| 1  | 2.024167000  | 0.068303000  | 5.066292000  |
| 6  | -4.896748000 | -1.519988000 | 3.454628000  |
| 1  | -5.216345000 | -1.147675000 | 4.450264000  |
| 1  | -5.221843000 | -0.752142000 | 2.719036000  |
| 6  | 2.248526000  | -1.461063000 | 6.627411000  |
| 1  | 3.158316000  | -1.888336000 | 6.148198000  |
| 1  | 2.606437000  | -0.742917000 | 7.394342000  |
| 15 | 2.801188000  | -5.633143000 | 1.780208000  |
| 8  | 3.846639000  | -6.356275000 | 0.966695000  |
| 8  | 3.164706000  | -5.318678000 | 3.335324000  |
| 8  | 1.363362000  | -6.394838000 | 1.945425000  |
| 6  | 4.018904000  | -6.233106000 | 4.097671000  |
| 1  | 4.622444000  | -6.819466000 | 3.369391000  |
| 6  | 4.950371000  | -5.386167000 | 4.962246000  |
| 1  | 4.327176000  | -4.715733000 | 5.595623000  |
| 1  | 5.570732000  | -4.736558000 | 4.310633000  |
| 6  | 5.828921000  | -6.278010000 | 5.854074000  |
| 1  | 6.471350000  | -5.644299000 | 6.500211000  |
| 1  | 6.518190000  | -6.870904000 | 5.211535000  |
| 6  | -1.630948000 | -6.859335000 | -0.335505000 |
| 1  | -1.273888000 | -6.331889000 | -1.249123000 |
| 1  | -2.694465000 | -6.569660000 | -0.203270000 |
| 6  | 3.159782000  | -7.183844000 | 4.933035000  |
| 1  | 2.477613000  | -6.573617000 | 5.565682000  |
| 1  | 2.522260000  | -7.796762000 | 4.262926000  |
| 6  | 4.980083000  | -7.235246000 | 6.702854000  |
| 1  | 5.634926000  | -7.896760000 | 7.308074000  |
| 1  | 4.373289000  | -6.643281000 | 7.424834000  |
| 6  | 0.650265000  | -6.812737000 | 0.736967000  |
| 1  | 1.098186000  | -6.293863000 | -0.142614000 |
| 6  | -0.809399000 | -6.386589000 | 0.873928000  |

|  |   |              |              |              |
|--|---|--------------|--------------|--------------|
|  | 1 | -1.215588000 | -6.835877000 | 1.807605000  |
|  | 1 | -0.864375000 | -5.285500000 | 0.994599000  |
|  | 6 | -1.501076000 | -8.375652000 | -0.543046000 |
|  | 1 | -1.966355000 | -8.903148000 | 0.320040000  |
|  | 1 | -2.065002000 | -8.690954000 | -1.446051000 |
|  | 6 | 0.796530000  | -8.322057000 | 0.544578000  |
|  | 1 | 0.442686000  | -8.824066000 | 1.472280000  |
|  | 1 | 1.870369000  | -8.572875000 | 0.421830000  |
|  | 6 | 4.041207000  | -8.074121000 | 5.824265000  |
|  | 1 | 3.399707000  | -8.730240000 | 6.448721000  |
|  | 1 | 4.647765000  | -8.750434000 | 5.180641000  |
|  | 6 | -0.029476000 | -8.800701000 | -0.660550000 |
|  | 1 | 0.402921000  | -8.372571000 | -1.592897000 |
|  | 1 | 0.053133000  | -9.903357000 | -0.757408000 |
